# Supplementary material for: 3,4-Dihydroxyphenylacetaldehyde synthase evolved an ordered and distinct active site to promote elastic cuticle formation and blood intake in Aedes aegypti
Source: Research Square preprint supplement (doi:10.21203/rs.3.rs-2667972/v1), 2023-03-28
Supplement: Supplementary file 1 [file b510d2a90a754c064779332b.xlsx]

## Sheet: development
gene id	go_f	interpro	pfam	kegg_pathway	kegg_reaction	reactome
5563771	GO:0000166///nucleotide binding+++GO:0004672///protein kinase activity+++GO:0004713///protein tyrosine kinase activity+++GO:0004715///non-membrane spanning protein tyrosine kinase activity+++GO:0005524///ATP binding+++GO:0016301///kinase activity+++GO:0016740///transferase activity	IPR000719///Protein kinase domain+++IPR000980///SH2 domain+++IPR001245///Serine-threonine/tyrosine-protein kinase, catalytic domain+++IPR001452///SH3 domain+++IPR001562///Zinc finger, Btk motif+++IPR001849///Pleckstrin homology domain+++IPR008266///Tyrosine-protein kinase, active site+++IPR011009///Protein kinase-like domain superfamily+++IPR011993///PH-like domain superfamily+++IPR017441///Prote…	PF00017///SH2 domain+++PF00018///SH3 domain+++PF00779///BTK motif+++PF07714///Protein tyrosine kinase	04013///MAPK signaling pathway - fly+++04380///Osteoclast differentiation+++04660///T cell receptor signaling pathway	NA	R-DME-111465///Apoptotic cleavage of cellular proteins+++R-DME-1660499///Synthesis of PIPs at the plasma membrane+++R-DME-2029482///Regulation of actin dynamics for phagocytic cup formation+++R-DME-2424491///DAP12 signaling+++R-DME-2871809///FCERI mediated Ca+2 mobilization+++R-DME-416476///G alpha (q) signalling events+++R-DME-416482///G alpha (12/13) signalling events+++R-DME-512988///Interleuk…
5564363	NA	IPR000980///SH2 domain+++IPR001452///SH3 domain+++IPR030219///Growth factor receptor-bound protein 2+++IPR036028///SH3-like domain superfamily+++IPR036860///SH2 domain superfamily	PF00017///SH2 domain+++PF00018///SH3 domain	01521///EGFR tyrosine kinase inhibitor resistance+++01522///Endocrine resistance+++04010///MAPK signaling pathway+++04012///ErbB signaling pathway+++04013///MAPK signaling pathway - fly+++04014///Ras signaling pathway+++04062///Chemokine signaling pathway+++04068///FoxO signaling pathway+++04072///Phospholipase D signaling pathway+++04150///mTOR signaling pathway+++04151///PI3K-Akt signaling path…	NA	R-DME-109704///PI3K Cascade+++R-DME-112412///SOS-mediated signalling+++R-DME-1250347///SHC1 events in ERBB4 signaling+++R-DME-1257604///PIP3 activates AKT signaling+++R-DME-1295596///Spry regulation of FGF signaling+++R-DME-1433557///Signaling by SCF-KIT+++R-DME-1433559///Regulation of KIT signaling+++R-DME-167044///Signalling to RAS+++R-DME-179812///GRB2 events in EGFR signaling+++R-DME-180292//…
5564544	GO:0000166///nucleotide binding+++GO:0004672///protein kinase activity+++GO:0004713///protein tyrosine kinase activity+++GO:0004714///transmembrane receptor protein tyrosine kinase activity+++GO:0005524///ATP binding+++GO:0016301///kinase activity+++GO:0016740///transferase activity	IPR000494///Receptor L-domain+++IPR000719///Protein kinase domain+++IPR001245///Serine-threonine/tyrosine-protein kinase, catalytic domain+++IPR006211///Furin-like cysteine-rich domain+++IPR006212///Furin-like repeat+++IPR008266///Tyrosine-protein kinase, active site+++IPR009030///Growth factor receptor cysteine-rich domain superfamily+++IPR011009///Protein kinase-like domain superfamily+++IPR016…	PF00757///Furin-like cysteine rich region+++PF01030///Receptor L domain+++PF07714///Protein tyrosine kinase+++PF14843///Growth factor receptor domain IV	01521///EGFR tyrosine kinase inhibitor resistance+++01522///Endocrine resistance+++04010///MAPK signaling pathway+++04012///ErbB signaling pathway+++04013///MAPK signaling pathway - fly+++04014///Ras signaling pathway+++04015///Rap1 signaling pathway+++04020///Calcium signaling pathway+++04066///HIF-1 signaling pathway+++04068///FoxO signaling pathway+++04072///Phospholipase D signaling pathway++…	NA	R-DME-1251985///Nuclear signaling by ERBB4+++R-DME-1253288///Downregulation of ERBB4 signaling+++R-DME-1358803///Downregulation of ERBB2:ERBB3 signaling+++R-DME-179812///GRB2 events in EGFR signaling+++R-DME-180292///GAB1 signalosome+++R-DME-180336///SHC1 events in EGFR signaling+++R-DME-182971///EGFR downregulation+++R-DME-2179392///EGFR Transactivation by Gastrin+++R-DME-445144///Signal transdu…
5564738	NA	IPR003598///Immunoglobulin subtype 2+++IPR003599///Immunoglobulin subtype+++IPR003961///Fibronectin type III+++IPR007110///Immunoglobulin-like domain+++IPR010560///Neogenin, C-terminal+++IPR013098///Immunoglobulin I-set+++IPR013783///Immunoglobulin-like fold+++IPR036116///Fibronectin type III superfamily+++IPR036179///Immunoglobulin-like domain superfamily	PF00041///Fibronectin type III domain+++PF06583///Neogenin C-terminus+++PF07679///Immunoglobulin I-set domain+++PF13927///Immunoglobulin domain+++PF16656///Purple acid Phosphatase, N-terminal domain	04350///TGF-beta signaling pathway+++04360///Axon guidance+++04514///Cell adhesion molecules (CAMs)	NA	NA
5564742	GO:0017154///semaphorin receptor activity	IPR001627///Sema domain+++IPR002165///Plexin repeat+++IPR002909///IPT domain+++IPR008936///Rho GTPase activation protein+++IPR013548///Plexin, cytoplasmic RasGAP domain+++IPR013783///Immunoglobulin-like fold+++IPR014756///Immunoglobulin E-set+++IPR015943///WD40/YVTN repeat-like-containing domain superfamily+++IPR016201///PSI domain+++IPR031146///Invertebrate plexin-B+++IPR031148///Plexin family++…	PF01403///Sema domain+++PF01437///Plexin repeat+++PF01833///IPT/TIG domain+++PF08337///Plexin cytoplasmic RasGAP domain+++PF17960///TIG domain+++PF18020///TIG domain found in plexin	04360///Axon guidance	NA	R-DME-416482///G alpha (12/13) signalling events+++R-DME-416700///Other semaphorin interactions
5564929	NA	IPR001799///Ephrin receptor-binding domain+++IPR008972///Cupredoxin+++IPR031328///Ephrin	PF00812///Ephrin	04360///Axon guidance	NA	NA
5565233	GO:0004672///protein kinase activity+++GO:0004713///protein tyrosine kinase activity+++GO:0005524///ATP binding	IPR000299///FERM domain+++IPR000719///Protein kinase domain+++IPR001245///Serine-threonine/tyrosine-protein kinase, catalytic domain+++IPR005189///Focal adhesion kinase, targeting (FAT) domain+++IPR008266///Tyrosine-protein kinase, active site+++IPR011009///Protein kinase-like domain superfamily+++IPR011993///PH-like domain superfamily+++IPR014352///FERM/acyl-CoA-binding protein superfamily+++IPR…	PF00373///FERM central domain+++PF03623///Focal adhesion targeting region+++PF07714///Protein tyrosine kinase+++PF18038///FERM N-terminal domain	01522///Endocrine resistance+++04012///ErbB signaling pathway+++04062///Chemokine signaling pathway+++04151///PI3K-Akt signaling pathway+++04360///Axon guidance+++04370///VEGF signaling pathway+++04510///Focal adhesion+++04670///Leukocyte transendothelial migration+++04810///Regulation of actin cytoskeleton+++05100///Bacterial invasion of epithelial cells+++05146///Amoebiasis+++05163///Human cyto…	NA	NA
5565963	GO:0003676///nucleic acid binding+++GO:0003723///RNA binding	IPR000504///RNA recognition motif domain+++IPR012677///Nucleotide-binding alpha-beta plait domain superfamily+++IPR035979///RNA-binding domain superfamily	PF00076///RNA recognition motif. (a.k.a. RRM, RBD, or RNP domain)	04320///Dorso-ventral axis formation	NA	R-DME-450408///AUF1 (hnRNP D0) binds and destabilizes mRNA+++R-DME-72163///mRNA Splicing - Major Pathway+++R-DME-72203///Processing of Capped Intron-Containing Pre-mRNA
5566181	GO:0004672///protein kinase activity+++GO:0005524///ATP binding	IPR000719///Protein kinase domain+++IPR011009///Protein kinase-like domain superfamily+++IPR017441///Protein kinase, ATP binding site	PF00069///Protein kinase domain	04012///ErbB signaling pathway+++04014///Ras signaling pathway+++04360///Axon guidance+++04510///Focal adhesion+++04660///T cell receptor signaling pathway+++04810///Regulation of actin cytoskeleton+++05170///Human immunodeficiency virus 1 infection+++05211///Renal cell carcinoma	NA	NA
5567324	NA	IPR001627///Sema domain+++IPR002165///Plexin repeat+++IPR003599///Immunoglobulin subtype+++IPR007110///Immunoglobulin-like domain+++IPR013783///Immunoglobulin-like fold+++IPR015943///WD40/YVTN repeat-like-containing domain superfamily+++IPR027231///Semaphorin+++IPR036179///Immunoglobulin-like domain superfamily+++IPR036352///Sema domain superfamily	PF01403///Sema domain+++PF01437///Plexin repeat	04360///Axon guidance	NA	NA
5567461	GO:0003676///nucleic acid binding	IPR000210///BTB/POZ domain+++IPR011333///SKP1/BTB/POZ domain superfamily+++IPR013087///Zinc finger C2H2-type+++IPR015318///Zinc finger, GAGA-binding factor	PF00651///BTB/POZ domain+++PF09237///GAGA factor	04214///Apoptosis - fly+++04320///Dorso-ventral axis formation	NA	NA
5567743	GO:0003779///actin binding	IPR011011///Zinc finger, FYVE/PHD-type+++IPR013083///Zinc finger, RING/FYVE/PHD-type+++IPR029901///Protein Spire+++IPR029905///Protein Spire1	NA	04320///Dorso-ventral axis formation	NA	NA
5568014	NA	IPR000270///PB1 domain+++IPR001478///PDZ domain+++IPR034874///Partitioning defective 6 homologue gamma+++IPR036034///PDZ superfamily	PF00564///PB1 domain+++PF00595///PDZ domain	04015///Rap1 signaling pathway+++04144///Endocytosis+++04360///Axon guidance+++04390///Hippo signaling pathway+++04391///Hippo signaling pathway - fly+++04530///Tight junction+++05165///Human papillomavirus infection	NA	R-MMU-420029///Tight junction interactions
5568816	GO:0003677///DNA binding+++GO:0005085///guanyl-nucleotide exchange factor activity+++GO:0005089///Rho guanyl-nucleotide exchange factor activity+++GO:0046982///protein heterodimerization activity	IPR000219///Dbl homology (DH) domain+++IPR000651///Ras-like guanine nucleotide exchange factor, N-terminal+++IPR001849///Pleckstrin homology domain+++IPR001895///Ras guanine-nucleotide exchange factors catalytic domain+++IPR002119///Histone H2A+++IPR007125///Histone H2A/H2B/H3+++IPR008937///Ras-like guanine nucleotide exchange factor+++IPR009072///Histone-fold+++IPR011993///PH-like domain superfa…	PF00125///Core histone H2A/H2B/H3/H4+++PF00169///PH domain+++PF00617///RasGEF domain+++PF00618///RasGEF N-terminal motif+++PF00621///RhoGEF domain	01521///EGFR tyrosine kinase inhibitor resistance+++01522///Endocrine resistance+++04010///MAPK signaling pathway+++04012///ErbB signaling pathway+++04013///MAPK signaling pathway - fly+++04014///Ras signaling pathway+++04062///Chemokine signaling pathway+++04068///FoxO signaling pathway+++04072///Phospholipase D signaling pathway+++04150///mTOR signaling pathway+++04151///PI3K-Akt signaling path…	NA	R-DME-112412///SOS-mediated signalling+++R-DME-1250347///SHC1 events in ERBB4 signaling+++R-DME-1433557///Signaling by SCF-KIT+++R-DME-1433559///Regulation of KIT signaling+++R-DME-167044///Signalling to RAS+++R-DME-179812///GRB2 events in EGFR signaling+++R-DME-180336///SHC1 events in EGFR signaling+++R-DME-193648///NRAGE signals death through JNK+++R-DME-194840///Rho GTPase cycle+++R-DME-196364…
5568887	GO:0005042///netrin receptor activity	IPR000884///Thrombospondin type-1 (TSP1) repeat+++IPR003598///Immunoglobulin subtype 2+++IPR003599///Immunoglobulin subtype+++IPR007110///Immunoglobulin-like domain+++IPR013098///Immunoglobulin I-set+++IPR013783///Immunoglobulin-like fold+++IPR036179///Immunoglobulin-like domain superfamily+++IPR036383///Thrombospondin type-1 (TSP1) repeat superfamily+++IPR037936///Netrin receptor UNC5	PF07679///Immunoglobulin I-set domain	04360///Axon guidance	NA	NA
5569656	NA	IPR000884///Thrombospondin type-1 (TSP1) repeat+++IPR001627///Sema domain+++IPR002165///Plexin repeat+++IPR015943///WD40/YVTN repeat-like-containing domain superfamily+++IPR016201///PSI domain+++IPR027231///Semaphorin+++IPR036352///Sema domain superfamily+++IPR036383///Thrombospondin type-1 (TSP1) repeat superfamily	PF00090///Thrombospondin type 1 domain+++PF01403///Sema domain+++PF01437///Plexin repeat	04360///Axon guidance	NA	R-RNO-416700///Other semaphorin interactions+++R-RNO-5173214///O-glycosylation of TSR domain-containing proteins
5569680	GO:0003676///nucleic acid binding	IPR003100///PAZ domain+++IPR003165///Piwi domain+++IPR012337///Ribonuclease H-like superfamily+++IPR014811///Argonaute, linker 1 domain+++IPR036085///PAZ domain superfamily+++IPR036397///Ribonuclease H superfamily	PF02170///PAZ domain+++PF02171///Piwi domain+++PF08699///Argonaute linker 1 domain	04320///Dorso-ventral axis formation	NA	NA
5570082	GO:0046983///protein dimerization activity	IPR024097///Basic helix-loop-helix leucine zipper transcription factor+++IPR024098///Transcription factor EB+++IPR031867///MiT/TFE transcription factors, N-terminal	PF15951///MITF/TFEB/TFEC/TFE3 N-terminus	04137///Mitophagy - animal+++04380///Osteoclast differentiation+++04916///Melanogenesis	NA	NA
5570107	GO:0003676///nucleic acid binding	IPR003100///PAZ domain+++IPR003165///Piwi domain+++IPR012337///Ribonuclease H-like superfamily+++IPR036085///PAZ domain superfamily+++IPR036397///Ribonuclease H superfamily	PF02170///PAZ domain+++PF02171///Piwi domain+++PF16486///N-terminal domain of argonaute	04320///Dorso-ventral axis formation	NA	NA
5570618	GO:0003676///nucleic acid binding	IPR000210///BTB/POZ domain+++IPR011333///SKP1/BTB/POZ domain superfamily+++IPR013087///Zinc finger C2H2-type+++IPR036236///Zinc finger C2H2 superfamily	PF00651///BTB/POZ domain+++PF13912///C2H2-type zinc finger	04214///Apoptosis - fly+++04320///Dorso-ventral axis formation	NA	NA
5570857	GO:0000166///nucleotide binding+++GO:0004672///protein kinase activity+++GO:0004674///protein serine/threonine kinase activity+++GO:0004707///MAP kinase activity+++GO:0005524///ATP binding+++GO:0016301///kinase activity+++GO:0016740///transferase activity	IPR000719///Protein kinase domain+++IPR003527///Mitogen-activated protein (MAP) kinase, conserved site+++IPR008271///Serine/threonine-protein kinase, active site+++IPR008351///Mitogen-activated protein (MAP) kinase, JNK+++IPR011009///Protein kinase-like domain superfamily	PF00069///Protein kinase domain	01522///Endocrine resistance+++04010///MAPK signaling pathway+++04012///ErbB signaling pathway+++04013///MAPK signaling pathway - fly+++04014///Ras signaling pathway+++04024///cAMP signaling pathway+++04068///FoxO signaling pathway+++04071///Sphingolipid signaling pathway+++04137///Mitophagy - animal+++04140///Autophagy - animal+++04141///Protein processing in endoplasmic reticulum+++04210///Apop…	NA	R-DME-193648///NRAGE signals death through JNK+++R-DME-209397///Formation of the cytosolic BSK 'scaffolding complex'+++R-DME-209409///Formation of the nuclear AP-1 transcription factor 'scaffolding complex'+++R-DME-209425///Transcriptional activtion by AP-1 transcription factor+++R-DME-209478///Dephosphorylation of BSK+++R-DME-2559580///Oxidative Stress Induced Senescence+++R-DME-2871796///FCERI …
5571049	GO:0000166///nucleotide binding+++GO:0004672///protein kinase activity+++GO:0004713///protein tyrosine kinase activity+++GO:0004715///non-membrane spanning protein tyrosine kinase activity+++GO:0005524///ATP binding+++GO:0016301///kinase activity+++GO:0016740///transferase activity	IPR000719///Protein kinase domain+++IPR000980///SH2 domain+++IPR001245///Serine-threonine/tyrosine-protein kinase, catalytic domain+++IPR001452///SH3 domain+++IPR008266///Tyrosine-protein kinase, active site+++IPR011009///Protein kinase-like domain superfamily+++IPR015015///F-actin binding+++IPR017441///Protein kinase, ATP binding site+++IPR020635///Tyrosine-protein kinase, catalytic domain+++IPR…	PF00017///SH2 domain+++PF00018///SH3 domain+++PF07714///Protein tyrosine kinase+++PF08919///F-actin binding	04012///ErbB signaling pathway+++04014///Ras signaling pathway+++04110///Cell cycle+++04360///Axon guidance+++04722///Neurotrophin signaling pathway+++05130///Pathogenic Escherichia coli infection+++05131///Shigellosis+++05200///Pathways in cancer+++05206///MicroRNAs in cancer+++05220///Chronic myeloid leukemia+++05416///Viral myocarditis	NA	R-DME-2029482///Regulation of actin dynamics for phagocytic cup formation+++R-DME-375170///CDO in myogenesis+++R-DME-428890///Role of ABL in ROBO-SLIT signaling+++R-DME-5663213///RHO GTPases Activate WASPs and WAVEs+++R-DME-5693565///Recruitment and ATM-mediated phosphorylation of repair and signaling proteins at DNA double strand breaks+++R-DME-8939236///RUNX1 regulates transcription of genes in…
5571157	GO:0005102///signaling receptor binding	IPR005817///Wnt+++IPR018161///Wnt protein, conserved site	PF00110///wnt family	04150///mTOR signaling pathway+++04310///Wnt signaling pathway+++04360///Axon guidance+++04390///Hippo signaling pathway+++04550///Signaling pathways regulating pluripotency of stem cells+++04916///Melanogenesis+++04919///Thyroid hormone signaling pathway	NA	R-HSA-3238698///WNT ligand biogenesis and trafficking+++R-HSA-373080///Class B/2 (Secretin family receptors)
5571592	GO:0005509///calcium ion binding	IPR000152///EGF-type aspartate/asparagine hydroxylation site+++IPR000372///Leucine-rich repeat N-terminal domain+++IPR000483///Cysteine-rich flanking region, C-terminal+++IPR000742///EGF-like domain+++IPR001611///Leucine-rich repeat+++IPR001791///Laminin G domain+++IPR001881///EGF-like calcium-binding domain+++IPR003591///Leucine-rich repeat, typical subtype+++IPR006207///Cystine knot, C-terminal…	PF00008///EGF-like domain+++PF00054///Laminin G domain+++PF01462///Leucine rich repeat N-terminal domain+++PF01463///Leucine rich repeat C-terminal domain+++PF13855///Leucine rich repeat	04360///Axon guidance	NA	NA
5572726	GO:0003677///DNA binding	IPR009057///Homeobox-like domain superfamily	NA	04214///Apoptosis - fly+++04320///Dorso-ventral axis formation	NA	NA
5573016	GO:0008270///zinc ion binding+++GO:0046872///metal ion binding	IPR001781///Zinc finger, LIM-type+++IPR010442///PET domain+++IPR037987///Four and a half LIM domains protein 2/3/5	PF00412///LIM domain+++PF06297///PET Domain	04380///Osteoclast differentiation	NA	NA
5573035	GO:0005509///calcium ion binding+++GO:0046872///metal ion binding	IPR000152///EGF-type aspartate/asparagine hydroxylation site+++IPR000742///EGF-like domain+++IPR000800///Notch domain+++IPR001881///EGF-like calcium-binding domain+++IPR002110///Ankyrin repeat+++IPR008297///Notch+++IPR009030///Growth factor receptor cysteine-rich domain superfamily+++IPR010660///Notch, NOD domain+++IPR011656///Notch, NODP domain+++IPR013032///EGF-like, conserved site+++IPR018097/…	PF00008///EGF-like domain+++PF00023///Ankyrin repeat+++PF00066///LNR domain+++PF06816///NOTCH protein+++PF07645///Calcium-binding EGF domain+++PF07684///NOTCH protein+++PF11936///Domain of unknown function (DUF3454)+++PF12661///Human growth factor-like EGF+++PF12796///Ankyrin repeats (3 copies)+++PF13857///Ankyrin repeats (many copies)	01522///Endocrine resistance+++04320///Dorso-ventral axis formation+++04330///Notch signaling pathway+++04658///Th1 and Th2 cell differentiation+++04919///Thyroid hormone signaling pathway+++05020///Prion diseases+++05165///Human papillomavirus infection+++05200///Pathways in cancer+++05206///MicroRNAs in cancer+++05224///Breast cancer	NA	NA
5574317	GO:0017154///semaphorin receptor activity	IPR001627///Sema domain+++IPR002165///Plexin repeat+++IPR002909///IPT domain+++IPR008936///Rho GTPase activation protein+++IPR013548///Plexin, cytoplasmic RasGAP domain+++IPR013783///Immunoglobulin-like fold+++IPR014756///Immunoglobulin E-set+++IPR015943///WD40/YVTN repeat-like-containing domain superfamily+++IPR016201///PSI domain+++IPR031148///Plexin family+++IPR036352///Sema domain superfamily	PF01403///Sema domain+++PF01437///Plexin repeat+++PF01833///IPT/TIG domain+++PF08337///Plexin cytoplasmic RasGAP domain+++PF17960///TIG domain+++PF18020///TIG domain found in plexin	04360///Axon guidance	NA	R-HSA-399954///Sema3A PAK dependent Axon repulsion+++R-HSA-399955///SEMA3A-Plexin repulsion signaling by inhibiting Integrin adhesion+++R-HSA-399956///CRMPs in Sema3A signaling+++R-HSA-416700///Other semaphorin interactions
5574452	GO:0000166///nucleotide binding+++GO:0003924///GTPase activity+++GO:0005525///GTP binding+++GO:0019001///guanyl nucleotide binding+++GO:0031683///G-protein beta/gamma-subunit complex binding	IPR001019///Guanine nucleotide binding protein (G-protein), alpha subunit+++IPR001408///G-protein alpha subunit, group I+++IPR011025///G protein alpha subunit, helical insertion+++IPR027417///P-loop containing nucleoside triphosphate hydrolase	PF00503///G-protein alpha subunit	04015///Rap1 signaling pathway+++04022///cGMP-PKG signaling pathway+++04024///cAMP signaling pathway+++04062///Chemokine signaling pathway+++04071///Sphingolipid signaling pathway+++04261///Adrenergic signaling in cardiomyocytes+++04360///Axon guidance+++04371///Apelin signaling pathway+++04540///Gap junction+++04611///Platelet activation+++04670///Leukocyte transendothelial migration+++04713///C…	NA	R-DME-112043///PLC beta mediated events+++R-DME-170670///Adenylate cyclase inhibitory pathway+++R-DME-202040///G-protein activation+++R-DME-2514859///Inactivation, recovery and regulation of the phototransduction cascade+++R-DME-418594///G alpha (i) signalling events+++R-DME-418597///G alpha (z) signalling events
5574902	GO:0003924///GTPase activity+++GO:0005525///GTP binding	IPR001806///Small GTPase+++IPR005225///Small GTP-binding protein domain+++IPR027417///P-loop containing nucleoside triphosphate hydrolase	PF00071///Ras family	04010///MAPK signaling pathway+++04011///MAPK signaling pathway - yeast+++04014///Ras signaling pathway+++04015///Rap1 signaling pathway+++04062///Chemokine signaling pathway+++04144///Endocytosis+++04360///Axon guidance+++04370///VEGF signaling pathway+++04510///Focal adhesion+++04520///Adherens junction+++04530///Tight junction+++04660///T cell receptor signaling pathway+++04666///Fc gamma R-me…	NA	NA
5575168	GO:0004672///protein kinase activity+++GO:0005524///ATP binding	IPR000719///Protein kinase domain+++IPR001245///Serine-threonine/tyrosine-protein kinase, catalytic domain+++IPR003306///WIF domain+++IPR008266///Tyrosine-protein kinase, active site+++IPR011009///Protein kinase-like domain superfamily+++IPR038677///WIF domain superfamily	PF02019///WIF domain+++PF07714///Protein tyrosine kinase	04310///Wnt signaling pathway+++04360///Axon guidance	NA	R-DME-201681///TCF dependent signaling in response to WNT
5575304	GO:0004672///protein kinase activity+++GO:0005524///ATP binding	IPR000095///CRIB domain+++IPR000719///Protein kinase domain+++IPR008271///Serine/threonine-protein kinase, active site+++IPR011009///Protein kinase-like domain superfamily+++IPR017441///Protein kinase, ATP binding site+++IPR036936///CRIB domain superfamily	PF00069///Protein kinase domain+++PF00786///P21-Rho-binding domain	04010///MAPK signaling pathway+++04011///MAPK signaling pathway - yeast+++04012///ErbB signaling pathway+++04014///Ras signaling pathway+++04024///cAMP signaling pathway+++04062///Chemokine signaling pathway+++04360///Axon guidance+++04392///Hippo signaling pathway - multiple species+++04510///Focal adhesion+++04625///C-type lectin receptor signaling pathway+++04650///Natural killer cell mediated…	NA	R-MMU-202433///Generation of second messenger molecules+++R-MMU-389359///CD28 dependent Vav1 pathway+++R-MMU-3928664///Ephrin signaling+++R-MMU-399954///Sema3A PAK dependent Axon repulsion+++R-MMU-5218920///VEGFR2 mediated vascular permeability+++R-MMU-5621575///CD209 (DC-SIGN) signaling+++R-MMU-5627123///RHO GTPases activate PAKs+++R-MMU-5687128///MAPK6/MAPK4 signaling
5575438	NA	IPR001627///Sema domain+++IPR002165///Plexin repeat+++IPR015943///WD40/YVTN repeat-like-containing domain superfamily+++IPR016201///PSI domain+++IPR027231///Semaphorin+++IPR036352///Sema domain superfamily	PF01403///Sema domain+++PF01437///Plexin repeat	04360///Axon guidance	NA	NA
5575808	GO:0003924///GTPase activity+++GO:0005525///GTP binding	IPR001806///Small GTPase+++IPR005225///Small GTP-binding protein domain+++IPR020849///Small GTPase superfamily, Ras-type+++IPR027417///P-loop containing nucleoside triphosphate hydrolase	PF00071///Ras family	01521///EGFR tyrosine kinase inhibitor resistance+++01522///Endocrine resistance+++04010///MAPK signaling pathway+++04012///ErbB signaling pathway+++04013///MAPK signaling pathway - fly+++04014///Ras signaling pathway+++04015///Rap1 signaling pathway+++04062///Chemokine signaling pathway+++04068///FoxO signaling pathway+++04071///Sphingolipid signaling pathway+++04072///Phospholipase D signaling …	NA	NA
5576197	GO:0003676///nucleic acid binding	IPR000210///BTB/POZ domain+++IPR011333///SKP1/BTB/POZ domain superfamily+++IPR013087///Zinc finger C2H2-type+++IPR036236///Zinc finger C2H2 superfamily	PF00096///Zinc finger, C2H2 type+++PF00651///BTB/POZ domain+++PF12874///Zinc-finger of C2H2 type	04214///Apoptosis - fly+++04320///Dorso-ventral axis formation	NA	NA
5576239	NA	IPR000731///Sterol-sensing domain+++IPR003392///Protein patched/dispatched	PF02460///Patched family	04024///cAMP signaling pathway+++04340///Hedgehog signaling pathway+++04341///Hedgehog signaling pathway - fly+++04360///Axon guidance+++05200///Pathways in cancer+++05205///Proteoglycans in cancer+++05217///Basal cell carcinoma	NA	R-DME-209338///Assembly of the 'signalling complexes'+++R-DME-5610787///Hedgehog 'off' state+++R-DME-5632681///Ligand-receptor interactions+++R-DME-5632684///Hedgehog 'on' state
5576370	GO:0003676///nucleic acid binding+++GO:0003700///DNA-binding transcription factor activity+++GO:0008270///zinc ion binding	IPR002369///Integrin beta subunit, VWA domain+++IPR012896///Integrin beta subunit, tail+++IPR012934///Zinc finger, AD-type+++IPR013087///Zinc finger C2H2-type+++IPR014836///Integrin beta subunit, cytoplasmic domain+++IPR015812///Integrin beta subunit+++IPR032695///Integrin domain superfamily+++IPR036236///Zinc finger C2H2 superfamily+++IPR036349///Integrin beta tail domain superfamily+++IPR036465…	PF00096///Zinc finger, C2H2 type+++PF00362///Integrin beta chain VWA domain+++PF07776///Zinc-finger associated domain (zf-AD) +++PF07965///Integrin beta tail domain+++PF08725///Integrin beta cytoplasmic domain	04015///Rap1 signaling pathway+++04145///Phagosome+++04151///PI3K-Akt signaling pathway+++04360///Axon guidance+++04510///Focal adhesion+++04512///ECM-receptor interaction+++04514///Cell adhesion molecules (CAMs)+++04530///Tight junction+++04611///Platelet activation+++04670///Leukocyte transendothelial migration+++04810///Regulation of actin cytoskeleton+++05100///Bacterial invasion of epithelia…	NA	R-DME-114608///Platelet degranulation +++R-DME-1236973///Cross-presentation of particulate exogenous antigens (phagosomes)+++R-DME-1566948///Elastic fibre formation+++R-DME-1566977///Fibronectin matrix formation+++R-DME-202733///Cell surface interactions at the vascular wall+++R-DME-210991///Basigin interactions+++R-DME-2129379///Molecules associated with elastic fibres+++R-DME-216083///Integrin …
5576468	GO:0000166///nucleotide binding+++GO:0005524///ATP binding+++GO:0016301///kinase activity+++GO:0016303///1-phosphatidylinositol-3-kinase activity+++GO:0016740///transferase activity+++GO:0046934///phosphatidylinositol-4,5-bisphosphate 3-kinase activity+++GO:0052812///phosphatidylinositol-3,4-bisphosphate 5-kinase activity	IPR000341///Phosphatidylinositol 3-kinase Ras-binding (PI3K RBD) domain+++IPR000403///Phosphatidylinositol 3-/4-kinase, catalytic domain+++IPR001263///Phosphoinositide 3-kinase, accessory (PIK) domain+++IPR002420///Phosphatidylinositol 3-kinase, C2 domain+++IPR003113///Phosphatidylinositol 3-kinase adaptor-binding (PI3K ABD) domain+++IPR008290///Phosphatidylinositol 3-kinase, Vps34 type+++IPR0110…	PF00454///Phosphatidylinositol 3- and 4-kinase+++PF00613///Phosphoinositide 3-kinase family, accessory domain (PIK domain)+++PF00792///Phosphoinositide 3-kinase C2+++PF00794///PI3-kinase family, ras-binding domain+++PF02192///PI3-kinase family, p85-binding domain	00562///Inositol phosphate metabolism+++01100///Metabolic pathways+++01521///EGFR tyrosine kinase inhibitor resistance+++01522///Endocrine resistance+++01524///Platinum drug resistance+++04012///ErbB signaling pathway+++04014///Ras signaling pathway+++04015///Rap1 signaling pathway+++04024///cAMP signaling pathway+++04062///Chemokine signaling pathway+++04066///HIF-1 signaling pathway+++04068///F…	R04545///ATP:1-phosphatidyl-1D-myo-inositol-4,5-bisphosphate 3-phosphotransferase ATP + 1-Phosphatidyl-D-myo-inositol 4,5-bisphosphate <=> ADP + Phosphatidylinositol-3,4,5-trisphosphate	R-HSA-109704///PI3K Cascade+++R-HSA-112399///IRS-mediated signalling+++R-HSA-114604///GPVI-mediated activation cascade+++R-HSA-1257604///PIP3 activates AKT signaling+++R-HSA-1660499///Synthesis of PIPs at the plasma membrane+++R-HSA-186763///Downstream signal transduction+++R-HSA-198203///PI3K/AKT activation+++R-HSA-202424///Downstream TCR signaling+++R-HSA-2029485///Role of phospholipids in phag…
5576696	GO:0004674///protein serine/threonine kinase activity+++GO:0005524///ATP binding	IPR000719///Protein kinase domain+++IPR008271///Serine/threonine-protein kinase, active site+++IPR011009///Protein kinase-like domain superfamily+++IPR017441///Protein kinase, ATP binding site	PF00069///Protein kinase domain	01521///EGFR tyrosine kinase inhibitor resistance+++01522///Endocrine resistance+++04010///MAPK signaling pathway+++04012///ErbB signaling pathway+++04013///MAPK signaling pathway - fly+++04014///Ras signaling pathway+++04015///Rap1 signaling pathway+++04022///cGMP-PKG signaling pathway+++04024///cAMP signaling pathway+++04062///Chemokine signaling pathway+++04066///HIF-1 signaling pathway+++0406…	NA	R-DME-110056///MAPK3 (ERK1) activation+++R-DME-112411///MAPK1 (ERK2) activation+++R-DME-209190///Phosphorylation of CI+++R-DME-209214///Phosphorylation of SMO+++R-DME-432553///Phosphorylation of PER and TIM+++R-DME-445144///Signal transduction by L1+++R-DME-5673000///RAF activation+++R-DME-5674135///MAP2K and MAPK activation+++R-DME-5674499///Negative feedback regulation of MAPK pathway
5576881	NA	IPR001134///Netrin domain+++IPR002049///Laminin EGF domain+++IPR008211///Laminin, N-terminal+++IPR008993///Tissue inhibitor of metalloproteinases-like, OB-fold+++IPR018933///Netrin module, non-TIMP type	PF00053///Laminin EGF domain+++PF00055///Laminin N-terminal (Domain VI)+++PF01759///UNC-6/NTR/C345C module	04360///Axon guidance	NA	R-DME-373752///Netrin-1 signaling+++R-DME-418885///DCC mediated attractive signaling
5576886	NA	IPR001134///Netrin domain+++IPR002049///Laminin EGF domain+++IPR008211///Laminin, N-terminal+++IPR008993///Tissue inhibitor of metalloproteinases-like, OB-fold+++IPR018933///Netrin module, non-TIMP type+++IPR038684///Laminin, N-terminal domain superfamily	PF00053///Laminin EGF domain+++PF00055///Laminin N-terminal (Domain VI)+++PF01759///UNC-6/NTR/C345C module	04360///Axon guidance	NA	R-DME-373752///Netrin-1 signaling+++R-DME-418885///DCC mediated attractive signaling
5576948	GO:0005509///calcium ion binding	IPR000152///EGF-type aspartate/asparagine hydroxylation site+++IPR000742///EGF-like domain+++IPR001507///Zona pellucida domain+++IPR001881///EGF-like calcium-binding domain+++IPR003645///Follistatin-like, N-terminal+++IPR006150///Cysteine-rich repeat+++IPR009030///Growth factor receptor cysteine-rich domain superfamily+++IPR013032///EGF-like, conserved site+++IPR018097///EGF-like calcium-binding,…	PF07645///Calcium-binding EGF domain	04320///Dorso-ventral axis formation+++04330///Notch signaling pathway+++04371///Apelin signaling pathway+++04658///Th1 and Th2 cell differentiation+++04919///Thyroid hormone signaling pathway	NA	NA
5576976	NA	IPR001627///Sema domain+++IPR002165///Plexin repeat+++IPR015943///WD40/YVTN repeat-like-containing domain superfamily+++IPR016201///PSI domain+++IPR027231///Semaphorin+++IPR036352///Sema domain superfamily	PF01403///Sema domain+++PF01437///Plexin repeat	04360///Axon guidance	NA	NA
5577365	GO:0005096///GTPase activator activity	IPR000008///C2 domain+++IPR000980///SH2 domain+++IPR001452///SH3 domain+++IPR001849///Pleckstrin homology domain+++IPR001936///Ras GTPase-activating domain+++IPR008936///Rho GTPase activation protein+++IPR011993///PH-like domain superfamily+++IPR023152///Ras GTPase-activating protein, conserved site+++IPR028554///Ras GTPase-activating protein 1+++IPR035652///RasGAP, SH3 domain+++IPR035841///Ras G…	PF00017///SH2 domain+++PF00018///SH3 domain+++PF00168///C2 domain+++PF00169///PH domain+++PF00616///GTPase-activator protein for Ras-like GTPase	04010///MAPK signaling pathway+++04013///MAPK signaling pathway - fly+++04014///Ras signaling pathway+++04360///Axon guidance	NA	NA
5577415	NA	IPR015425///Formin, FH2 domain	PF02181///Formin Homology 2 Domain	04320///Dorso-ventral axis formation	NA	NA
5577490	GO:0003676///nucleic acid binding	IPR003100///PAZ domain+++IPR003165///Piwi domain+++IPR012337///Ribonuclease H-like superfamily+++IPR032474///Protein argonaute, N-terminal+++IPR036085///PAZ domain superfamily+++IPR036397///Ribonuclease H superfamily	PF02170///PAZ domain+++PF02171///Piwi domain+++PF16486///N-terminal domain of argonaute	04320///Dorso-ventral axis formation	NA	NA
5577491	GO:0003676///nucleic acid binding	IPR003100///PAZ domain+++IPR003165///Piwi domain+++IPR012337///Ribonuclease H-like superfamily+++IPR036085///PAZ domain superfamily+++IPR036397///Ribonuclease H superfamily	PF02170///PAZ domain+++PF02171///Piwi domain+++PF16486///N-terminal domain of argonaute	04320///Dorso-ventral axis formation	NA	NA
5577744	GO:0005096///GTPase activator activity	IPR000198///Rho GTPase-activating protein domain+++IPR001060///FCH domain+++IPR001452///SH3 domain+++IPR008936///Rho GTPase activation protein+++IPR027267///AH/BAR domain superfamily+++IPR031160///F-BAR domain+++IPR036028///SH3-like domain superfamily	PF00018///SH3 domain+++PF00611///Fes/CIP4, and EFC/F-BAR homology domain+++PF00620///RhoGAP domain	04360///Axon guidance	NA	R-HSA-194840///Rho GTPase cycle+++R-HSA-428543///Inactivation of CDC42 and RAC1
5578019	GO:0004672///protein kinase activity+++GO:0005524///ATP binding	IPR000719///Protein kinase domain+++IPR008271///Serine/threonine-protein kinase, active site+++IPR011009///Protein kinase-like domain superfamily+++IPR017441///Protein kinase, ATP binding site	PF00069///Protein kinase domain	04010///MAPK signaling pathway+++04012///ErbB signaling pathway+++04013///MAPK signaling pathway - fly+++04141///Protein processing in endoplasmic reticulum+++04214///Apoptosis - fly+++04380///Osteoclast differentiation+++04530///Tight junction+++04620///Toll-like receptor signaling pathway+++04624///Toll and Imd signaling pathway+++04660///T cell receptor signaling pathway+++04664///Fc epsilon R…	NA	R-DME-209397///Formation of the cytosolic BSK 'scaffolding complex'+++R-DME-209447///Activation of the IkappaB kinase complex, KEY:IRD5 dimer:KEY+++R-DME-2559580///Oxidative Stress Induced Senescence+++R-DME-2871796///FCERI mediated MAPK activation+++R-DME-350376///Activation of RAC1:GTP by FZ:DSH complex+++R-DME-450321///JNK (c-Jun kinases) phosphorylation and activation mediated by activated hu…
5578257	GO:0035014///phosphatidylinositol 3-kinase regulator activity	IPR000980///SH2 domain+++IPR001720///PI3K p85/p55 subunit+++IPR032498///PI3K p85 subunit, inter-SH2 domain+++IPR035020///PI3K p85 subunit, C-terminal SH2 domain+++IPR035022///PI3K p85 subunit, N-terminal SH2 domain+++IPR036860///SH2 domain superfamily	PF00017///SH2 domain+++PF16454///Phosphatidylinositol 3-kinase regulatory subunit P85 inter-SH2 domain	04012///ErbB signaling pathway+++04014///Ras signaling pathway+++04015///Rap1 signaling pathway+++04024///cAMP signaling pathway+++04062///Chemokine signaling pathway+++04066///HIF-1 signaling pathway+++04068///FoxO signaling pathway+++04070///Phosphatidylinositol signaling system+++04071///Sphingolipid signaling pathway+++04072///Phospholipase D signaling pathway+++04140///Autophagy - animal+++0…	R03362///ATP:1-phosphatidyl-1D-myo-inositol 3-phosphotransferase ATP + 1-Phosphatidyl-D-myo-inositol <=> ADP + 1-Phosphatidyl-1D-myo-inositol 3-phosphate+++R04545///ATP:1-phosphatidyl-1D-myo-inositol-4,5-bisphosphate 3-phosphotransferase ATP + 1-Phosphatidyl-D-myo-inositol 4,5-bisphosphate <=> ADP + Phosphatidylinositol-3,4,5-trisphosphate+++R05795///ATP:1-phosphatidyl-1D-myo-inositol-4-phosphate…	R-BTA-109704///PI3K Cascade+++R-BTA-112399///IRS-mediated signalling+++R-BTA-114604///GPVI-mediated activation cascade+++R-BTA-1250342///PI3K events in ERBB4 signaling+++R-BTA-1257604///PIP3 activates AKT signaling+++R-BTA-1266695///Interleukin-7 signaling+++R-BTA-1433557///Signaling by SCF-KIT+++R-BTA-1660499///Synthesis of PIPs at the plasma membrane+++R-BTA-180292///GAB1 signalosome+++R-BTA-18…
5578405	GO:0003676///nucleic acid binding	IPR003100///PAZ domain+++IPR003165///Piwi domain+++IPR012337///Ribonuclease H-like superfamily+++IPR036085///PAZ domain superfamily+++IPR036397///Ribonuclease H superfamily	PF02170///PAZ domain+++PF02171///Piwi domain	04320///Dorso-ventral axis formation	NA	NA
5578717	GO:0003676///nucleic acid binding	IPR000210///BTB/POZ domain+++IPR011333///SKP1/BTB/POZ domain superfamily+++IPR013087///Zinc finger C2H2-type+++IPR036236///Zinc finger C2H2 superfamily	PF00096///Zinc finger, C2H2 type+++PF00651///BTB/POZ domain	04214///Apoptosis - fly+++04320///Dorso-ventral axis formation	NA	NA
5579494	GO:0003924///GTPase activity+++GO:0005525///GTP binding	IPR001806///Small GTPase+++IPR003578///Small GTPase Rho+++IPR005225///Small GTP-binding protein domain+++IPR027417///P-loop containing nucleoside triphosphate hydrolase	PF00071///Ras family	04010///MAPK signaling pathway+++04013///MAPK signaling pathway - fly+++04014///Ras signaling pathway+++04015///Rap1 signaling pathway+++04024///cAMP signaling pathway+++04062///Chemokine signaling pathway+++04071///Sphingolipid signaling pathway+++04145///Phagosome+++04151///PI3K-Akt signaling pathway+++04310///Wnt signaling pathway+++04360///Axon guidance+++04370///VEGF signaling pathway+++0438…	NA	NA
5579522	GO:0005102///signaling receptor binding	IPR005817///Wnt+++IPR018161///Wnt protein, conserved site	PF00110///wnt family	04150///mTOR signaling pathway+++04310///Wnt signaling pathway+++04360///Axon guidance+++04390///Hippo signaling pathway+++04550///Signaling pathways regulating pluripotency of stem cells+++04916///Melanogenesis+++04934///Cushing syndrome+++05165///Human papillomavirus infection+++05200///Pathways in cancer+++05205///Proteoglycans in cancer+++05217///Basal cell carcinoma+++05224///Breast cancer++…	NA	R-DME-3238698///WNT ligand biogenesis and trafficking+++R-DME-4641262///Disassembly of the destruction complex and recruitment of AXIN to the membrane
5579816	GO:0000166///nucleotide binding+++GO:0004672///protein kinase activity+++GO:0004674///protein serine/threonine kinase activity+++GO:0005524///ATP binding+++GO:0016301///kinase activity+++GO:0016740///transferase activity+++GO:0017048///Rho GTPase binding+++GO:0046872///metal ion binding	IPR000719///Protein kinase domain+++IPR000961///AGC-kinase, C-terminal+++IPR001849///Pleckstrin homology domain+++IPR002219///Protein kinase C-like, phorbol ester/diacylglycerol-binding domain+++IPR008271///Serine/threonine-protein kinase, active site+++IPR011009///Protein kinase-like domain superfamily+++IPR011993///PH-like domain superfamily+++IPR015008///Rho binding domain+++IPR017441///Protei…	PF00069///Protein kinase domain+++PF08912///Rho Binding	04022///cGMP-PKG signaling pathway+++04024///cAMP signaling pathway+++04062///Chemokine signaling pathway+++04071///Sphingolipid signaling pathway+++04270///Vascular smooth muscle contraction+++04350///TGF-beta signaling pathway+++04360///Axon guidance+++04510///Focal adhesion+++04530///Tight junction+++04611///Platelet activation+++04670///Leukocyte transendothelial migration+++04810///Regulatio…	NA	R-HSA-3928662///EPHB-mediated forward signaling+++R-HSA-3928663///EPHA-mediated growth cone collapse+++R-HSA-416482///G alpha (12/13) signalling events+++R-HSA-416572///Sema4D induced cell migration and growth-cone collapse+++R-HSA-4420097///VEGFA-VEGFR2 Pathway+++R-HSA-5627117///RHO GTPases Activate ROCKs
5580128	GO:0003676///nucleic acid binding	IPR000210///BTB/POZ domain+++IPR011333///SKP1/BTB/POZ domain superfamily+++IPR013087///Zinc finger C2H2-type+++IPR036236///Zinc finger C2H2 superfamily	PF00096///Zinc finger, C2H2 type+++PF00651///BTB/POZ domain	04214///Apoptosis - fly+++04320///Dorso-ventral axis formation	NA	NA
5580173	GO:0005509///calcium ion binding	IPR002048///EF-hand domain+++IPR011992///EF-hand domain pair+++IPR018247///EF-Hand 1, calcium-binding site	PF13405///EF-hand domain	04360///Axon guidance+++04510///Focal adhesion+++04530///Tight junction+++04611///Platelet activation+++04670///Leukocyte transendothelial migration+++04810///Regulation of actin cytoskeleton	NA	NA
23687660	GO:0003677///DNA binding	IPR000210///BTB/POZ domain+++IPR005312///Protein of unknown function DUF1759+++IPR007889///DNA binding HTH domain, Psq-type+++IPR009057///Homeobox-like domain superfamily+++IPR011333///SKP1/BTB/POZ domain superfamily	PF00651///BTB/POZ domain+++PF03564///Protein of unknown function (DUF1759)+++PF05225///helix-turn-helix, Psq domain	04214///Apoptosis - fly+++04320///Dorso-ventral axis formation	NA	NA
110678287	NA	NA	NA	04320///Dorso-ventral axis formation	NA	NA

## Sheet: cuticle protein
gene id	go_f	interpro	pfam	kegg_pathway	kegg_reaction	reactome
5563640	GO:0042302///structural constituent of cuticle	IPR000618///Insect cuticle protein+++IPR031311///Chitin-binding type R&R consensus	PF00379///Insect cuticle protein	NA	NA	NA
5564387	GO:0042302///structural constituent of cuticle	IPR000618///Insect cuticle protein+++IPR031311///Chitin-binding type R&R consensus	PF00379///Insect cuticle protein	NA	NA	NA
5565204	GO:0042302///structural constituent of cuticle	IPR000618///Insect cuticle protein+++IPR031311///Chitin-binding type R&R consensus	PF00379///Insect cuticle protein	04151///PI3K-Akt signaling pathway+++04510///Focal adhesion+++04512///ECM-receptor interaction+++04611///Platelet activation+++04926///Relaxin signaling pathway+++04974///Protein digestion and absorption	NA	NA
5565247	NA	IPR039750///Dynein regulatory complex protein	NA	NA	NA	NA
5565248	GO:0042302///structural constituent of cuticle	IPR000618///Insect cuticle protein+++IPR031311///Chitin-binding type R&R consensus	PF00379///Insect cuticle protein	NA	NA	NA
5565357	NA	IPR031874///Adult cuticle protein 1	PF15955///Cuticle protein	03020///RNA polymerase	NA	NA
5565371	GO:0042302///structural constituent of cuticle	IPR000618///Insect cuticle protein	PF00379///Insect cuticle protein	NA	NA	NA
5565379	GO:0042302///structural constituent of cuticle	IPR000618///Insect cuticle protein+++IPR031311///Chitin-binding type R&R consensus	PF00379///Insect cuticle protein	03020///RNA polymerase	NA	NA
5565382	NA	NA	NA	03020///RNA polymerase	NA	NA
5565390	GO:0042302///structural constituent of cuticle	IPR000618///Insect cuticle protein+++IPR031311///Chitin-binding type R&R consensus	PF00379///Insect cuticle protein	03020///RNA polymerase	NA	NA
5565391	GO:0042302///structural constituent of cuticle	IPR000618///Insect cuticle protein+++IPR031311///Chitin-binding type R&R consensus	PF00379///Insect cuticle protein	03020///RNA polymerase	NA	NA
5565392	GO:0042302///structural constituent of cuticle	IPR000618///Insect cuticle protein+++IPR031311///Chitin-binding type R&R consensus	PF00379///Insect cuticle protein	NA	NA	NA
5565431	NA	NA	NA	NA	NA	NA
5565692	NA	IPR031874///Adult cuticle protein 1	PF15955///Cuticle protein	NA	NA	NA
5565790	NA	NA	NA	NA	NA	NA
5566568	GO:0042302///structural constituent of cuticle	IPR000618///Insect cuticle protein+++IPR031311///Chitin-binding type R&R consensus	PF00379///Insect cuticle protein	NA	NA	NA
5566838	NA	NA	NA	NA	NA	NA
5566839	GO:0042302///structural constituent of cuticle	IPR000618///Insect cuticle protein	PF00379///Insect cuticle protein	NA	NA	NA
5567225	GO:0042302///structural constituent of cuticle	IPR000618///Insect cuticle protein+++IPR031311///Chitin-binding type R&R consensus	PF00379///Insect cuticle protein
5567226	GO:0042302///structural constituent of cuticle	IPR000618///Insect cuticle protein	PF00379///Insect cuticle protein
5567227	GO:0042302///structural constituent of cuticle	IPR000618///Insect cuticle protein	PF00379///Insect cuticle protein	NA	NA	NA
5567228	GO:0042302///structural constituent of cuticle	IPR000618///Insect cuticle protein+++IPR031311///Chitin-binding type R&R consensus	PF00379///Insect cuticle protein
5567229	GO:0042302///structural constituent of cuticle	IPR000618///Insect cuticle protein	PF00379///Insect cuticle protein
5567230	GO:0042302///structural constituent of cuticle	IPR000618///Insect cuticle protein	PF00379///Insect cuticle protein	NA	NA	NA
5567232	GO:0042302///structural constituent of cuticle	IPR000618///Insect cuticle protein+++IPR031311///Chitin-binding type R&R consensus	PF00379///Insect cuticle protein	NA	NA	NA
5567233	GO:0042302///structural constituent of cuticle	IPR000618///Insect cuticle protein+++IPR031311///Chitin-binding type R&R consensus	PF00379///Insect cuticle protein	NA	NA	NA
5567555	GO:0042302///structural constituent of cuticle	IPR000618///Insect cuticle protein	PF00379///Insect cuticle protein	03020///RNA polymerase	NA	NA
5568885				04151///PI3K-Akt signaling pathway+++04510///Focal adhesion+++04512///ECM-receptor interaction+++04611///Platelet activation+++04926///Relaxin signaling pathway+++04974///Protein digestion and absorption	NA	NA
5568889	GO:0042302///structural constituent of cuticle	IPR000618///Insect cuticle protein	PF00379///Insect cuticle protein	04151///PI3K-Akt signaling pathway+++04510///Focal adhesion+++04512///ECM-receptor interaction+++04611///Platelet activation+++04926///Relaxin signaling pathway+++04974///Protein digestion and absorption	NA	NA
5570308	NA	NA	NA	NA	NA	NA
5570384	GO:0042302///structural constituent of cuticle	IPR000618///Insect cuticle protein+++IPR031311///Chitin-binding type R&R consensus	PF00379///Insect cuticle protein	04151///PI3K-Akt signaling pathway+++04510///Focal adhesion+++04512///ECM-receptor interaction+++04611///Platelet activation+++04926///Relaxin signaling pathway+++04974///Protein digestion and absorption	NA	NA
5570386	GO:0042302///structural constituent of cuticle	IPR000618///Insect cuticle protein	PF00379///Insect cuticle protein	04151///PI3K-Akt signaling pathway+++04510///Focal adhesion+++04512///ECM-receptor interaction+++04611///Platelet activation+++04926///Relaxin signaling pathway+++04974///Protein digestion and absorption	NA	NA
5570387	GO:0042302///structural constituent of cuticle	IPR000618///Insect cuticle protein	PF00379///Insect cuticle protein	04151///PI3K-Akt signaling pathway+++04510///Focal adhesion+++04512///ECM-receptor interaction+++04611///Platelet activation+++04926///Relaxin signaling pathway+++04974///Protein digestion and absorption	NA	NA
5570390	GO:0042302///structural constituent of cuticle	IPR000618///Insect cuticle protein+++IPR031311///Chitin-binding type R&R consensus	PF00379///Insect cuticle protein	04151///PI3K-Akt signaling pathway+++04510///Focal adhesion+++04512///ECM-receptor interaction+++04611///Platelet activation+++04926///Relaxin signaling pathway+++04974///Protein digestion and absorption	NA	NA
5570391	GO:0042302///structural constituent of cuticle	IPR000618///Insect cuticle protein	PF00379///Insect cuticle protein	04151///PI3K-Akt signaling pathway+++04510///Focal adhesion+++04512///ECM-receptor interaction+++04611///Platelet activation+++04926///Relaxin signaling pathway+++04974///Protein digestion and absorption	NA	NA
5570392				04151///PI3K-Akt signaling pathway+++04510///Focal adhesion+++04512///ECM-receptor interaction+++04611///Platelet activation+++04926///Relaxin signaling pathway+++04974///Protein digestion and absorption	NA	NA
5571030	GO:0042302///structural constituent of cuticle	IPR000618///Insect cuticle protein+++IPR031311///Chitin-binding type R&R consensus	PF00379///Insect cuticle protein	04062///Chemokine signaling pathway+++04144///Endocytosis+++04520///Adherens junction+++04530///Tight junction+++04666///Fc gamma R-mediated phagocytosis+++04810///Regulation of actin cytoskeleton	NA	NA
5571160	GO:0042302///structural constituent of cuticle	IPR000618///Insect cuticle protein+++IPR031311///Chitin-binding type R&R consensus	PF00379///Insect cuticle protein	04151///PI3K-Akt signaling pathway+++04510///Focal adhesion+++04512///ECM-receptor interaction+++04611///Platelet activation+++04926///Relaxin signaling pathway+++04974///Protein digestion and absorption	NA	NA
5571161	GO:0042302///structural constituent of cuticle	IPR000618///Insect cuticle protein	PF00379///Insect cuticle protein	04151///PI3K-Akt signaling pathway+++04510///Focal adhesion+++04512///ECM-receptor interaction+++04611///Platelet activation+++04926///Relaxin signaling pathway+++04974///Protein digestion and absorption	NA	NA
5571165	GO:0042302///structural constituent of cuticle	IPR000618///Insect cuticle protein+++IPR031311///Chitin-binding type R&R consensus	PF00379///Insect cuticle protein	04151///PI3K-Akt signaling pathway+++04510///Focal adhesion+++04512///ECM-receptor interaction+++04611///Platelet activation+++04926///Relaxin signaling pathway+++04974///Protein digestion and absorption	NA	NA
5571167	GO:0042302///structural constituent of cuticle	IPR000618///Insect cuticle protein+++IPR031311///Chitin-binding type R&R consensus	PF00379///Insect cuticle protein	NA	NA	NA
5571328	NA	IPR022727///Pupal cuticle protein C1	PF11018///Pupal cuticle protein C1	NA	NA	NA
5571329	NA	NA	NA	NA	NA	NA
5571330	GO:0042302///structural constituent of cuticle	IPR000618///Insect cuticle protein+++IPR031311///Chitin-binding type R&R consensus	PF00379///Insect cuticle protein	NA	NA	NA
5571333	GO:0042302///structural constituent of cuticle	IPR000618///Insect cuticle protein+++IPR031311///Chitin-binding type R&R consensus	PF00379///Insect cuticle protein	NA	NA	NA
5571336	GO:0042302///structural constituent of cuticle	IPR000618///Insect cuticle protein+++IPR031311///Chitin-binding type R&R consensus	PF00379///Insect cuticle protein	NA	NA	NA
5571343	GO:0042302///structural constituent of cuticle	IPR000618///Insect cuticle protein+++IPR031311///Chitin-binding type R&R consensus	PF00379///Insect cuticle protein	NA	NA	NA
5571347	GO:0042302///structural constituent of cuticle	IPR000618///Insect cuticle protein	PF00379///Insect cuticle protein	NA	NA	NA
5571359	NA	NA	NA	NA	NA	NA
5571360	GO:0042302///structural constituent of cuticle	IPR000618///Insect cuticle protein	PF00379///Insect cuticle protein	NA	NA	NA
5571362	GO:0042302///structural constituent of cuticle	IPR000618///Insect cuticle protein+++IPR031311///Chitin-binding type R&R consensus	PF00379///Insect cuticle protein	NA	NA	NA
5571363	GO:0042302///structural constituent of cuticle	IPR000618///Insect cuticle protein	PF00379///Insect cuticle protein	NA	NA	NA
5571365	GO:0042302///structural constituent of cuticle	IPR000618///Insect cuticle protein	PF00379///Insect cuticle protein	NA	NA	NA
5571371	GO:0042302///structural constituent of cuticle	IPR000618///Insect cuticle protein+++IPR031311///Chitin-binding type R&R consensus	PF00379///Insect cuticle protein	NA	NA	NA
5571372	GO:0042302///structural constituent of cuticle	IPR000618///Insect cuticle protein+++IPR031311///Chitin-binding type R&R consensus	PF00379///Insect cuticle protein	NA	NA	NA
5571374	GO:0042302///structural constituent of cuticle	IPR000618///Insect cuticle protein	PF00379///Insect cuticle protein	03020///RNA polymerase	NA	NA
5571375	GO:0042302///structural constituent of cuticle	IPR000618///Insect cuticle protein+++IPR031311///Chitin-binding type R&R consensus	PF00379///Insect cuticle protein	NA	NA	NA
5571995	GO:0042302///structural constituent of cuticle	IPR000618///Insect cuticle protein	PF00379///Insect cuticle protein	NA	NA	NA
5572411	GO:0042302///structural constituent of cuticle	IPR000618///Insect cuticle protein+++IPR031311///Chitin-binding type R&R consensus	PF00379///Insect cuticle protein	03020///RNA polymerase	NA	NA
5572416	GO:0042302///structural constituent of cuticle	IPR000618///Insect cuticle protein	PF00379///Insect cuticle protein	03020///RNA polymerase	NA	NA
5572417	NA	IPR031874///Adult cuticle protein 1	PF15955///Cuticle protein	03020///RNA polymerase	NA	NA
5572418	GO:0042302///structural constituent of cuticle	IPR000618///Insect cuticle protein+++IPR031311///Chitin-binding type R&R consensus	PF00379///Insect cuticle protein	03020///RNA polymerase	NA	NA
5572419	NA	NA	NA	03020///RNA polymerase	NA	NA
5572420	NA	IPR031874///Adult cuticle protein 1	PF15955///Cuticle protein	03020///RNA polymerase	NA	NA
5572675	GO:0042302///structural constituent of cuticle	IPR000618///Insect cuticle protein+++IPR031311///Chitin-binding type R&R consensus	PF00379///Insect cuticle protein	NA	NA	NA
5572911	GO:0042302///structural constituent of cuticle	IPR000618///Insect cuticle protein+++IPR031311///Chitin-binding type R&R consensus	PF00379///Insect cuticle protein	04151///PI3K-Akt signaling pathway+++04510///Focal adhesion+++04512///ECM-receptor interaction+++04611///Platelet activation+++04926///Relaxin signaling pathway+++04974///Protein digestion and absorption	NA	NA
5573507	GO:0042302///structural constituent of cuticle	IPR000618///Insect cuticle protein+++IPR031311///Chitin-binding type R&R consensus	PF00379///Insect cuticle protein	03008///Ribosome biogenesis in eukaryotes	NA	NA
5573908	GO:0042302///structural constituent of cuticle	IPR000618///Insect cuticle protein+++IPR031311///Chitin-binding type R&R consensus	PF00379///Insect cuticle protein	NA	NA	NA
5573911	GO:0042302///structural constituent of cuticle	IPR000618///Insect cuticle protein+++IPR031311///Chitin-binding type R&R consensus	PF00379///Insect cuticle protein	NA	NA	NA
5573912	GO:0042302///structural constituent of cuticle	IPR000618///Insect cuticle protein+++IPR031311///Chitin-binding type R&R consensus	PF00379///Insect cuticle protein	NA	NA	NA
5573914	GO:0003676///nucleic acid binding	IPR001214///SET domain+++IPR013087///Zinc finger C2H2-type+++IPR036236///Zinc finger C2H2 superfamily	PF00096///Zinc finger, C2H2 type	NA	NA	NA
5573918	GO:0042302///structural constituent of cuticle	IPR000618///Insect cuticle protein	PF00379///Insect cuticle protein	NA	NA	NA
5573924	GO:0042302///structural constituent of cuticle	IPR000618///Insect cuticle protein	PF00379///Insect cuticle protein	NA	NA	NA
5574260	NA	NA	NA	04151///PI3K-Akt signaling pathway+++04510///Focal adhesion+++04512///ECM-receptor interaction+++04926///Relaxin signaling pathway+++04974///Protein digestion and absorption	NA	R-DRE-2470946///Cohesin Loading onto Chromatin
5574261	NA	NA	NA	04151///PI3K-Akt signaling pathway+++04510///Focal adhesion+++04512///ECM-receptor interaction+++04926///Relaxin signaling pathway+++04974///Protein digestion and absorption	NA	NA
5574268	GO:0042302///structural constituent of cuticle	IPR000618///Insect cuticle protein+++IPR031311///Chitin-binding type R&R consensus	PF00379///Insect cuticle protein	NA	NA	NA
5574269	GO:0042302///structural constituent of cuticle	IPR000618///Insect cuticle protein+++IPR031311///Chitin-binding type R&R consensus	PF00379///Insect cuticle protein	NA	NA	NA
5574271	NA	NA	NA	03020///RNA polymerase	NA	NA
5574294	NA	NA	NA	NA	NA	NA
5574768	NA	IPR031874///Adult cuticle protein 1	PF15955///Cuticle protein	NA	NA	NA
5574896				NA	NA	NA
5575766	NA	NA	NA	NA	NA	NA
5577134	GO:0042302///structural constituent of cuticle	IPR000618///Insect cuticle protein+++IPR031311///Chitin-binding type R&R consensus	PF00379///Insect cuticle protein	NA	NA	NA
5577597	GO:0003677///DNA binding+++GO:0003700///DNA-binding transcription factor activity+++GO:0043565///sequence-specific DNA binding	IPR001356///Homeobox domain+++IPR001827///Homeobox protein, antennapedia type, conserved site+++IPR009057///Homeobox-like domain superfamily+++IPR017970///Homeobox, conserved site+++IPR017995///Homeobox protein, antennapedia type+++IPR020479///Homeobox domain, metazoa	PF00046///Homeodomain	NA	NA	NA
5577602	GO:0042302///structural constituent of cuticle	IPR000618///Insect cuticle protein	PF00379///Insect cuticle protein	04151///PI3K-Akt signaling pathway+++04510///Focal adhesion+++04512///ECM-receptor interaction+++04611///Platelet activation+++04926///Relaxin signaling pathway+++04974///Protein digestion and absorption	NA	NA
5577604	GO:0042302///structural constituent of cuticle	IPR000618///Insect cuticle protein	PF00379///Insect cuticle protein	NA	NA	NA
5577605	NA	NA	NA	NA	NA	NA
5577609	NA	NA	NA	NA	NA	NA
5577610				NA	NA	NA
5577614
5577643	NA	IPR004145///Domain of unknown function DUF243	PF03103///Domain of unknown function (DUF243)	NA	NA	NA
5577796	GO:0042302///structural constituent of cuticle	IPR000618///Insect cuticle protein+++IPR031311///Chitin-binding type R&R consensus	PF00379///Insect cuticle protein	03020///RNA polymerase	NA	NA
5578136	NA	NA	NA	04151///PI3K-Akt signaling pathway+++04510///Focal adhesion+++04512///ECM-receptor interaction+++04611///Platelet activation+++04926///Relaxin signaling pathway+++04974///Protein digestion and absorption	NA	NA
5578395	GO:0042302///structural constituent of cuticle	IPR000618///Insect cuticle protein+++IPR031311///Chitin-binding type R&R consensus	PF00379///Insect cuticle protein	NA	NA	NA
5578584	NA	IPR031874///Adult cuticle protein 1	PF15955///Cuticle protein	NA	NA	NA
5579042	GO:0042302///structural constituent of cuticle	IPR000618///Insect cuticle protein+++IPR031311///Chitin-binding type R&R consensus	PF00379///Insect cuticle protein	04151///PI3K-Akt signaling pathway+++04510///Focal adhesion+++04512///ECM-receptor interaction+++04926///Relaxin signaling pathway+++04974///Protein digestion and absorption	NA	NA
5579385	GO:0004222///metalloendopeptidase activity+++GO:0008237///metallopeptidase activity	IPR000718///Peptidase M13+++IPR008753///Peptidase M13, N-terminal domain+++IPR029736///Endothelin-converting enzyme-like 1	PF05649///Peptidase family M13	NA	NA	NA
5579980	NA	NA	NA	NA	NA	NA
5579984				NA	NA	NA
5579985	GO:0042302///structural constituent of cuticle	IPR000618///Insect cuticle protein+++IPR031311///Chitin-binding type R&R consensus	PF00379///Insect cuticle protein	NA	NA	NA
5580149	GO:0042302///structural constituent of cuticle	IPR000618///Insect cuticle protein	PF00379///Insect cuticle protein	NA	NA	NA
23687562	GO:0042302///structural constituent of cuticle	IPR000618///Insect cuticle protein+++IPR031311///Chitin-binding type R&R consensus	PF00379///Insect cuticle protein
23687616	GO:0042302///structural constituent of cuticle	IPR000618///Insect cuticle protein+++IPR031311///Chitin-binding type R&R consensus	PF00379///Insect cuticle protein	NA	NA	NA
110674133	GO:0042302///structural constituent of cuticle	IPR000618///Insect cuticle protein	PF00379///Insect cuticle protein	03020///RNA polymerase	NA	NA
110675242	GO:0042302///structural constituent of cuticle	IPR000618///Insect cuticle protein	PF00379///Insect cuticle protein	03008///Ribosome biogenesis in eukaryotes	NA	NA
110675243	GO:0042302///structural constituent of cuticle	IPR000618///Insect cuticle protein	PF00379///Insect cuticle protein	03008///Ribosome biogenesis in eukaryotes	NA	NA
110675632	GO:0042302///structural constituent of cuticle	IPR000618///Insect cuticle protein+++IPR031311///Chitin-binding type R&R consensus	PF00379///Insect cuticle protein	04151///PI3K-Akt signaling pathway+++04510///Focal adhesion+++04512///ECM-receptor interaction+++04611///Platelet activation+++04926///Relaxin signaling pathway+++04974///Protein digestion and absorption	NA	NA
110676075	GO:0042302///structural constituent of cuticle	IPR000618///Insect cuticle protein+++IPR031311///Chitin-binding type R&R consensus	PF00379///Insect cuticle protein	03008///Ribosome biogenesis in eukaryotes	NA	NA
110676948	GO:0042302///structural constituent of cuticle	IPR000618///Insect cuticle protein	PF00379///Insect cuticle protein	03008///Ribosome biogenesis in eukaryotes	NA	NA
110677097	NA	NA	NA	00600///Sphingolipid metabolism+++01100///Metabolic pathways	R02541///Sphingomyelin cholinephosphohydrolase Sphingomyelin + H2O <=> N-Acylsphingosine + Choline phosphate	NA
110677170	GO:0042302///structural constituent of cuticle	IPR000618///Insect cuticle protein	PF00379///Insect cuticle protein	03008///Ribosome biogenesis in eukaryotes	NA	NA
110677171	GO:0042302///structural constituent of cuticle	IPR000618///Insect cuticle protein+++IPR031311///Chitin-binding type R&R consensus	PF00379///Insect cuticle protein	03008///Ribosome biogenesis in eukaryotes	NA	NA
110677172	GO:0042302///structural constituent of cuticle	IPR000618///Insect cuticle protein	PF00379///Insect cuticle protein	03008///Ribosome biogenesis in eukaryotes	NA	NA
110677177	GO:0042302///structural constituent of cuticle	IPR000618///Insect cuticle protein	PF00379///Insect cuticle protein	03008///Ribosome biogenesis in eukaryotes	NA	NA
110677178	NA	NA	NA	03008///Ribosome biogenesis in eukaryotes	NA	NA
110677179	NA	NA	NA	03008///Ribosome biogenesis in eukaryotes	NA	NA
110678802	GO:0042302///structural constituent of cuticle	IPR000618///Insect cuticle protein+++IPR031311///Chitin-binding type R&R consensus	PF00379///Insect cuticle protein
110679003				NA	NA	NA

## Sheet: chitin metabolism
gene_id	go_f	interpro	pfam	kegg_pathway	kegg_reaction	reactome
5564236	GO:0008061///chitin binding	IPR002557///Chitin binding domain+++IPR036508///Chitin binding domain superfamily	PF01607///Chitin binding Peritrophin-A domain	NA	NA	NA
5564619	GO:0003824///catalytic activity	IPR005195///Glycoside hydrolase, family 65, central catalytic+++IPR008928///Six-hairpin glycosidase superfamily+++IPR012341///Six-hairpin glycosidase-like superfamily	PF03632///Glycosyl hydrolase family 65 central catalytic domain	NA	NA	NA
5564630	GO:0015929///hexosaminidase activity	IPR015883///Glycoside hydrolase family 20, catalytic domain+++IPR017853///Glycoside hydrolase superfamily+++IPR038901///Hexosaminidase D	PF00728///Glycosyl hydrolase family 20, catalytic domain	00511///Other glycan degradation+++00513///Various types of N-glycan biosynthesis+++01100///Metabolic pathways	R09323///NA G13057 + H2O <=> N-Acetyl-D-glucosamine + G13058	NA
5564649	GO:0004553///hydrolase activity, hydrolyzing O-glycosyl compounds+++GO:0016787///hydrolase activity+++GO:0016798///hydrolase activity, acting on glycosyl bonds	IPR000322///Glycoside hydrolase family 31+++IPR013780///Glycosyl hydrolase, all-beta+++IPR017853///Glycoside hydrolase superfamily	PF01055///Glycosyl hydrolases family 31	00052///Galactose metabolism+++00500///Starch and sucrose metabolism+++01100///Metabolic pathways	R00028///maltose glucohydrolase Maltose + H2O <=> 2 D-Glucose+++R00801///sucrose glucohydrolase Sucrose + H2O <=> D-Fructose + D-Glucose+++R00802///sucrose alpha-glucohydrolase Sucrose + H2O <=> beta-D-Fructose + alpha-D-Glucose+++R06087///NA Sucrose + H2O <=> D-Fructose + D-Glucose+++R06088///NA Sucrose + H2O <=> beta-D-Fructose + alpha-D-Glucose	NA
5564678	GO:0003824///catalytic activity+++GO:0004559///alpha-mannosidase activity+++GO:0016787///hydrolase activity+++GO:0016798///hydrolase activity, acting on glycosyl bonds+++GO:0030246///carbohydrate binding+++GO:0046872///metal ion binding	IPR000602///Glycoside hydrolase family 38, N-terminal domain+++IPR011013///Galactose mutarotase-like domain superfamily+++IPR011330///Glycoside hydrolase/deacetylase, beta/alpha-barrel+++IPR011682///Glycosyl hydrolase family 38, C-terminal+++IPR013780///Glycosyl hydrolase, all-beta+++IPR015341///Glycoside hydrolase family 38, central domain+++IPR027291///Glycoside hydrolase 38, N-terminal domain …	PF01074///Glycosyl hydrolases family 38 N-terminal domain+++PF07748///Glycosyl hydrolases family 38 C-terminal domain+++PF09261///Alpha mannosidase middle domain	00511///Other glycan degradation	NA	R-MMU-6811438///Intra-Golgi traffic+++R-MMU-975578///Reactions specific to the complex N-glycan synthesis pathway
5564939	GO:0004061///arylformamidase activity+++GO:0016787///hydrolase activity	IPR013094///Alpha/beta hydrolase fold-3+++IPR027519///Kynurenine formamidase, vertebrates/fungi-type+++IPR029058///Alpha/Beta hydrolase fold	PF07859///alpha/beta hydrolase fold	00380///Tryptophan metabolism+++00630///Glyoxylate and dicarboxylate metabolism+++01100///Metabolic pathways	R00988///N-Formylanthranilate amidohydrolase Formylanthranilate + H2O <=> Formate + Anthranilate+++R01959///N-Formyl-L-kynurenine amidohydrolase L-Formylkynurenine + H2O <=> Formate + L-Kynurenine+++R04911///Aryl-formylamine amidohydrolase 5-Hydroxy-N-formylkynurenine + H2O <=> 5-Hydroxykynurenine + Formate	NA
5565066	GO:0004553///hydrolase activity, hydrolyzing O-glycosyl compounds+++GO:0004565///beta-galactosidase activity+++GO:0016787///hydrolase activity+++GO:0016798///hydrolase activity, acting on glycosyl bonds	IPR001944///Glycoside hydrolase, family 35+++IPR008979///Galactose-binding-like domain superfamily+++IPR017853///Glycoside hydrolase superfamily+++IPR019801///Glycoside hydrolase, family 35, conserved site+++IPR026283///Beta-galactosidase 1-like+++IPR031330///Glycoside hydrolase 35, catalytic domain	PF01301///Glycosyl hydrolases family 35	00052///Galactose metabolism+++00511///Other glycan degradation+++00531///Glycosaminoglycan degradation+++00600///Sphingolipid metabolism+++00604///Glycosphingolipid biosynthesis - ganglio series+++01100///Metabolic pathways+++04142///Lysosome	R01678///Lactose galactohydrolase Lactose + H2O <=> alpha-D-Glucose + D-Galactose+++R03355///beta-D-Galactosyl-1,4-beta-D-glucosylceramide galactohydrolase beta-D-Galactosyl-(1->4)-beta-D-glucosyl-(1<->1)-ceramide + H2O <=> beta-D-Glucosyl-(1<->1)-ceramide + D-Galactose+++R04633///D-Galactosyl-N-acetyl-D-galactosaminyl-(N-acetylneuraminyl)-D- galactosyl-D-glucosylceramide galactohydrolase D-Galac…	NA
5565074	GO:0003824///catalytic activity	IPR006047///Glycosyl hydrolase, family 13, catalytic domain+++IPR017853///Glycoside hydrolase superfamily	PF00128///Alpha amylase, catalytic domain	00052///Galactose metabolism+++00500///Starch and sucrose metabolism+++01100///Metabolic pathways	R00028///maltose glucohydrolase Maltose + H2O <=> 2 D-Glucose+++R00801///sucrose glucohydrolase Sucrose + H2O <=> D-Fructose + D-Glucose+++R00802///sucrose alpha-glucohydrolase Sucrose + H2O <=> beta-D-Fructose + alpha-D-Glucose+++R06087///NA Sucrose + H2O <=> D-Fructose + D-Glucose+++R06088///NA Sucrose + H2O <=> beta-D-Fructose + alpha-D-Glucose	NA
5565108	GO:0004407///histone deacetylase activity+++GO:0016787///hydrolase activity+++GO:0032041///NAD-dependent histone deacetylase activity (H3-K14 specific)+++GO:0046872///metal ion binding	IPR000286///Histone deacetylase family+++IPR003084///Histone deacetylase+++IPR023696///Ureohydrolase domain superfamily+++IPR023801///Histone deacetylase domain+++IPR037138///Histone deacetylase domain superfamily	PF00850///Histone deacetylase domain	04110///Cell cycle+++04213///Longevity regulating pathway - multiple species+++04330///Notch signaling pathway+++04919///Thyroid hormone signaling pathway+++05016///Huntington disease+++05034///Alcoholism+++05165///Human papillomavirus infection+++05169///Epstein-Barr virus infection+++05200///Pathways in cancer+++05202///Transcriptional misregulation in cancer+++05203///Viral carcinogenesis+++05…	NA	R-DME-1538133///G0 and Early G1+++R-DME-201722///Formation of the beta-catenin:TCF transactivating complex+++R-DME-209394///Transcriptional activtion and repression of REL-68 target genes+++R-DME-2173795///Downregulation of SMAD2/3:SMAD4 transcriptional activity+++R-DME-3769402///Deactivation of the beta-catenin transactivating complex+++R-DME-8936459///RUNX1 regulates genes involved in megakaryo…
5565215	GO:0004553///hydrolase activity, hydrolyzing O-glycosyl compounds+++GO:0004563///beta-N-acetylhexosaminidase activity+++GO:0016787///hydrolase activity+++GO:0016798///hydrolase activity, acting on glycosyl bonds+++GO:0102148///N-acetyl-beta-D-galactosaminidase activity	IPR015883///Glycoside hydrolase family 20, catalytic domain+++IPR017853///Glycoside hydrolase superfamily+++IPR025705///Beta-hexosaminidase+++IPR029018///Beta-hexosaminidase-like, domain 2+++IPR029019///Beta-hexosaminidase, eukaryotic type, N-terminal	PF00728///Glycosyl hydrolase family 20, catalytic domain+++PF14845///beta-acetyl hexosaminidase like	00511///Other glycan degradation+++00513///Various types of N-glycan biosynthesis+++00520///Amino sugar and nucleotide sugar metabolism+++00531///Glycosaminoglycan degradation+++00603///Glycosphingolipid biosynthesis - globo and isoglobo series+++00604///Glycosphingolipid biosynthesis - ganglio series+++01100///Metabolic pathways+++04142///Lysosome	R00022///chitobiose N-acetylglucosaminohydrolase Chitobiose + H2O <=> 2 N-Acetyl-D-glucosamine+++R06004///NA GM2 + H2O <=> GM3 + N-Acetyl-D-galactosamine+++R11316///NA G13056 + H2O <=> N-Acetyl-D-glucosamine + G10665	NA
5565449	GO:0003824///catalytic activity	IPR006047///Glycosyl hydrolase, family 13, catalytic domain+++IPR017853///Glycoside hydrolase superfamily	PF00128///Alpha amylase, catalytic domain	00052///Galactose metabolism+++00500///Starch and sucrose metabolism+++01100///Metabolic pathways	R00028///maltose glucohydrolase Maltose + H2O <=> 2 D-Glucose+++R00801///sucrose glucohydrolase Sucrose + H2O <=> D-Fructose + D-Glucose+++R00802///sucrose alpha-glucohydrolase Sucrose + H2O <=> beta-D-Fructose + alpha-D-Glucose+++R06087///NA Sucrose + H2O <=> D-Fructose + D-Glucose+++R06088///NA Sucrose + H2O <=> beta-D-Fructose + alpha-D-Glucose	R-DME-352230///Amino acid transport across the plasma membrane
5565534	GO:0046872///metal ion binding	IPR001965///Zinc finger, PHD-type+++IPR011011///Zinc finger, FYVE/PHD-type+++IPR013083///Zinc finger, RING/FYVE/PHD-type+++IPR019542///Enhancer of polycomb-like, N-terminal+++IPR019786///Zinc finger, PHD-type, conserved site+++IPR019787///Zinc finger, PHD-finger+++IPR034732///Extended PHD (ePHD) domain	PF10513///Enhancer of polycomb-like+++PF13831///PHD-finger+++PF13832///PHD-zinc-finger like domain	NA	NA	NA
5565659	GO:0008061///chitin binding	IPR002557///Chitin binding domain+++IPR036508///Chitin binding domain superfamily	PF01607///Chitin binding Peritrophin-A domain	04151///PI3K-Akt signaling pathway+++04510///Focal adhesion+++04512///ECM-receptor interaction+++04611///Platelet activation+++04926///Relaxin signaling pathway+++04974///Protein digestion and absorption	NA	NA
5565699	GO:0004563///beta-N-acetylhexosaminidase activity+++GO:0102148///N-acetyl-beta-D-galactosaminidase activity	IPR015883///Glycoside hydrolase family 20, catalytic domain+++IPR017853///Glycoside hydrolase superfamily+++IPR025705///Beta-hexosaminidase+++IPR029018///Beta-hexosaminidase-like, domain 2+++IPR029019///Beta-hexosaminidase, eukaryotic type, N-terminal	PF00728///Glycosyl hydrolase family 20, catalytic domain+++PF14845///beta-acetyl hexosaminidase like	00511///Other glycan degradation+++00513///Various types of N-glycan biosynthesis+++00520///Amino sugar and nucleotide sugar metabolism+++00531///Glycosaminoglycan degradation+++00603///Glycosphingolipid biosynthesis - globo and isoglobo series+++00604///Glycosphingolipid biosynthesis - ganglio series+++01100///Metabolic pathways+++04142///Lysosome	R00022///chitobiose N-acetylglucosaminohydrolase Chitobiose + H2O <=> 2 N-Acetyl-D-glucosamine+++R06004///NA GM2 + H2O <=> GM3 + N-Acetyl-D-galactosamine+++R11316///NA G13056 + H2O <=> N-Acetyl-D-glucosamine + G10665	R-MMU-1660662///Glycosphingolipid metabolism+++R-MMU-6798695///Neutrophil degranulation
5565972	GO:0004553///hydrolase activity, hydrolyzing O-glycosyl compounds	IPR001360///Glycoside hydrolase family 1+++IPR017853///Glycoside hydrolase superfamily+++IPR033132///Glycosyl hydrolases family 1, N-terminal conserved site	PF00232///Glycosyl hydrolase family 1	00052///Galactose metabolism+++01100///Metabolic pathways+++04973///Carbohydrate digestion and absorption	R01678///Lactose galactohydrolase Lactose + H2O <=> alpha-D-Glucose + D-Galactose+++R06114///NA Lactose + H2O <=> D-Glucose + D-Galactose	NA
5565973	GO:0004553///hydrolase activity, hydrolyzing O-glycosyl compounds+++GO:0016787///hydrolase activity+++GO:0016798///hydrolase activity, acting on glycosyl bonds	IPR001360///Glycoside hydrolase family 1+++IPR017853///Glycoside hydrolase superfamily+++IPR018120///Glycoside hydrolase family 1, active site+++IPR033132///Glycosyl hydrolases family 1, N-terminal conserved site	PF00232///Glycosyl hydrolase family 1	00052///Galactose metabolism+++01100///Metabolic pathways+++04973///Carbohydrate digestion and absorption	R01678///Lactose galactohydrolase Lactose + H2O <=> alpha-D-Glucose + D-Galactose+++R06114///NA Lactose + H2O <=> D-Glucose + D-Galactose	NA
5566037	GO:0004553///hydrolase activity, hydrolyzing O-glycosyl compounds	IPR001360///Glycoside hydrolase family 1+++IPR017853///Glycoside hydrolase superfamily+++IPR033132///Glycosyl hydrolases family 1, N-terminal conserved site	PF00232///Glycosyl hydrolase family 1	00052///Galactose metabolism+++01100///Metabolic pathways+++04973///Carbohydrate digestion and absorption	R01678///Lactose galactohydrolase Lactose + H2O <=> alpha-D-Glucose + D-Galactose+++R06114///NA Lactose + H2O <=> D-Glucose + D-Galactose	NA
5566120	GO:0003824///catalytic activity+++GO:0004553///hydrolase activity, hydrolyzing O-glycosyl compounds+++GO:0016787///hydrolase activity+++GO:0016798///hydrolase activity, acting on glycosyl bonds	IPR000111///Glycoside hydrolase family 27/36, conserved site+++IPR002241///Glycoside hydrolase, family 27+++IPR013780///Glycosyl hydrolase, all-beta+++IPR013785///Aldolase-type TIM barrel+++IPR017853///Glycoside hydrolase superfamily+++IPR035373///Alpha galactosidase A, C-terminal beta-sandwich domain	PF16499///Alpha galactosidase A+++PF17450///Alpha galactosidase A C-terminal beta sandwich domain	00052///Galactose metabolism+++00561///Glycerolipid metabolism+++00600///Sphingolipid metabolism+++00603///Glycosphingolipid biosynthesis - globo and isoglobo series+++01100///Metabolic pathways+++04142///Lysosome	R01101///melibiose galactohydrolase Melibiose + H2O <=> D-Galactose + D-Glucose+++R01103///Raffinose galactohydrolase Raffinose + H2O <=> D-Galactose + Sucrose+++R01104///Galactosylglycerol galactohydrolase 3-beta-D-Galactosyl-sn-glycerol + H2O <=> D-Galactose + Glycerol+++R01194///3-O-alpha-D-Galactosyl-1D-myo-inositol galactohydrolase; 1-alpha-D-Galactosyl-myo-inositol alpha-D-Galactosyl-(1->3)…	NA
5566933	GO:0008061///chitin binding	IPR036508///Chitin binding domain superfamily	NA	NA	NA	NA
5567015	GO:0004559///alpha-mannosidase activity+++GO:0030246///carbohydrate binding+++GO:0046872///metal ion binding	IPR000602///Glycoside hydrolase family 38, N-terminal domain+++IPR011013///Galactose mutarotase-like domain superfamily+++IPR011330///Glycoside hydrolase/deacetylase, beta/alpha-barrel+++IPR011682///Glycosyl hydrolase family 38, C-terminal+++IPR013780///Glycosyl hydrolase, all-beta+++IPR015341///Glycoside hydrolase family 38, central domain+++IPR027291///Glycoside hydrolase 38, N-terminal domain …	PF01074///Glycosyl hydrolases family 38 N-terminal domain+++PF07748///Glycosyl hydrolases family 38 C-terminal domain+++PF09261///Alpha mannosidase middle domain+++PF17677///Glycosyl hydrolases family 38 C-terminal beta sandwich domain	00511///Other glycan degradation+++04142///Lysosome	R08717///NA G00309 + H2O <=> G00319 + D-Mannose+++R08718///NA G00595 + H2O <=> G00971 + D-Mannose	NA
5567352	GO:0016811///hydrolase activity, acting on carbon-nitrogen (but not peptide) bonds, in linear amides	IPR003010///Carbon-nitrogen hydrolase+++IPR012101///Biotinidase-like, eukaryotic+++IPR036526///Carbon-nitrogen hydrolase superfamily	PF00795///Carbon-nitrogen hydrolase	00780///Biotin metabolism+++01100///Metabolic pathways+++04977///Vitamin digestion and absorption	R01077///N6-D-Biotinyl-L-lysine amidohydrolase Biocytin + H2O <=> Biotin + L-Lysine	R-DME-196780///Biotin transport and metabolism+++R-DME-199220///Vitamin B5 (pantothenate) metabolism+++R-DME-6798695///Neutrophil degranulation
5567542	GO:0004252///serine-type endopeptidase activity+++GO:0004553///hydrolase activity, hydrolyzing O-glycosyl compounds+++GO:0008061///chitin binding+++GO:0016787///hydrolase activity+++GO:0016798///hydrolase activity, acting on glycosyl bonds	IPR001223///Glycoside hydrolase family 18, catalytic domain+++IPR001254///Serine proteases, trypsin domain+++IPR001314///Peptidase S1A, chymotrypsin family+++IPR001579///Glycoside hydrolase, chitinase active site+++IPR009003///Peptidase S1, PA clan+++IPR011583///Chitinase II+++IPR017853///Glycoside hydrolase superfamily+++IPR018114///Serine proteases, trypsin family, histidine active site+++IPR02…	PF00089///Trypsin+++PF00704///Glycosyl hydrolases family 18	00520///Amino sugar and nucleotide sugar metabolism+++01100///Metabolic pathways	R01206///[1,4-(N-Acetyl-beta-D-glucosaminyl)]n glycanohydrolase Chitin + H2O <=> N-Acetyl-D-glucosamine + Chitin+++R02334///[1,4-(N-Acetyl-beta-D-glucosaminyl)]n glycanohydrolase Chitin + H2O <=> Chitobiose + Chitin	NA
5567569	GO:0008061///chitin binding	IPR002557///Chitin binding domain+++IPR036508///Chitin binding domain superfamily	PF01607///Chitin binding Peritrophin-A domain	NA	NA	NA
5567690	GO:0003824///catalytic activity	IPR005195///Glycoside hydrolase, family 65, central catalytic+++IPR008928///Six-hairpin glycosidase superfamily+++IPR012341///Six-hairpin glycosidase-like superfamily	PF03632///Glycosyl hydrolase family 65 central catalytic domain	NA	NA	NA
5567839	GO:0005509///calcium ion binding+++GO:0046872///metal ion binding+++GO:0051082///unfolded protein binding	IPR001580///Calreticulin/calnexin+++IPR009033///Calreticulin/calnexin, P domain superfamily+++IPR009169///Calreticulin+++IPR013320///Concanavalin A-like lectin/glucanase domain superfamily+++IPR018124///Calreticulin/calnexin, conserved site	PF00262///Calreticulin family	04141///Protein processing in endoplasmic reticulum+++04145///Phagosome+++04612///Antigen processing and presentation+++05142///Chagas disease (American trypanosomiasis)+++05163///Human cytomegalovirus infection+++05166///Human T-cell leukemia virus 1 infection+++05169///Epstein-Barr virus infection+++05170///Human immunodeficiency virus 1 infection	NA	R-DME-901042///Calnexin/calreticulin cycle
5567903	GO:0008061///chitin binding	IPR002557///Chitin binding domain+++IPR017853///Glycoside hydrolase superfamily	PF01607///Chitin binding Peritrophin-A domain	NA	NA	NA
5568186	GO:0008061///chitin binding	IPR002557///Chitin binding domain+++IPR036508///Chitin binding domain superfamily	PF01607///Chitin binding Peritrophin-A domain	NA	NA	NA
5568259	GO:0008061///chitin binding	IPR002557///Chitin binding domain+++IPR036508///Chitin binding domain superfamily	PF01607///Chitin binding Peritrophin-A domain	NA	NA	NA
5568365	GO:0004470///malic enzyme activity+++GO:0004471///malate dehydrogenase (decarboxylating) (NAD+) activity+++GO:0016491///oxidoreductase activity+++GO:0046872///metal ion binding+++GO:0051287///NAD binding	IPR001891///Malic oxidoreductase+++IPR012301///Malic enzyme, N-terminal domain+++IPR012302///Malic enzyme, NAD-binding+++IPR015884///Malic enzyme, conserved site+++IPR036291///NAD(P)-binding domain superfamily+++IPR037062///Malic enzyme, N-terminal domain superfamily	PF00390///Malic enzyme, N-terminal domain+++PF03949///Malic enzyme, NAD binding domain	00620///Pyruvate metabolism+++00710///Carbon fixation in photosynthetic organisms+++01100///Metabolic pathways+++01120///Microbial metabolism in diverse environments+++01200///Carbon metabolism	R00216///(S)-Malate:NADP+ oxidoreductase(oxaloacetate-decarboxylating) (S)-Malate + NADP+ <=> Pyruvate + CO2 + NADPH + H+	NA
5568677	GO:0008270///zinc ion binding+++GO:0008745///N-acetylmuramoyl-L-alanine amidase activity+++GO:0042834///peptidoglycan binding	IPR002502///N-acetylmuramoyl-L-alanine amidase domain+++IPR006619///Peptidoglycan recognition protein family domain, metazoa/bacteria+++IPR015510///Peptidoglycan recognition protein+++IPR017331///Peptidoglycan recognition protein, PGRP-S+++IPR036505///N-acetylmuramoyl-L-alanine amidase/PGRP domain superfamily	PF01510///N-acetylmuramoyl-L-alanine amidase	NA	R04112///N-Acetylmuramoyl-Ala amidohydrolase N-Acetylmuramoyl-Ala + H2O <=> N-Acetylmuramate + L-Alanine	NA
5568816	GO:0003677///DNA binding+++GO:0005085///guanyl-nucleotide exchange factor activity+++GO:0005089///Rho guanyl-nucleotide exchange factor activity+++GO:0046982///protein heterodimerization activity	IPR000219///Dbl homology (DH) domain+++IPR000651///Ras-like guanine nucleotide exchange factor, N-terminal+++IPR001849///Pleckstrin homology domain+++IPR001895///Ras guanine-nucleotide exchange factors catalytic domain+++IPR002119///Histone H2A+++IPR007125///Histone H2A/H2B/H3+++IPR008937///Ras-like guanine nucleotide exchange factor+++IPR009072///Histone-fold+++IPR011993///PH-like domain superfa…	PF00125///Core histone H2A/H2B/H3/H4+++PF00169///PH domain+++PF00617///RasGEF domain+++PF00618///RasGEF N-terminal motif+++PF00621///RhoGEF domain	01521///EGFR tyrosine kinase inhibitor resistance+++01522///Endocrine resistance+++04010///MAPK signaling pathway+++04012///ErbB signaling pathway+++04013///MAPK signaling pathway - fly+++04014///Ras signaling pathway+++04062///Chemokine signaling pathway+++04068///FoxO signaling pathway+++04072///Phospholipase D signaling pathway+++04150///mTOR signaling pathway+++04151///PI3K-Akt signaling path…	NA	R-DME-112412///SOS-mediated signalling+++R-DME-1250347///SHC1 events in ERBB4 signaling+++R-DME-1433557///Signaling by SCF-KIT+++R-DME-1433559///Regulation of KIT signaling+++R-DME-167044///Signalling to RAS+++R-DME-179812///GRB2 events in EGFR signaling+++R-DME-180336///SHC1 events in EGFR signaling+++R-DME-193648///NRAGE signals death through JNK+++R-DME-194840///Rho GTPase cycle+++R-DME-196364…
5569000	GO:0003824///catalytic activity	IPR000873///AMP-dependent synthetase/ligase+++IPR025110///AMP-binding enzyme, C-terminal domain+++IPR032387///Acetyl-coenzyme A synthetase, N-terminal domain	PF00501///AMP-binding enzyme+++PF13193///AMP-binding enzyme C-terminal domain+++PF16177///Acetyl-coenzyme A synthetase N-terminus	00640///Propanoate metabolism+++01100///Metabolic pathways	R00925///Propanoate:CoA ligase (AMP-forming) ATP + Propanoate + CoA <=> AMP + Diphosphate + Propanoyl-CoA+++R00926///Propionyladenylate:CoA propionyltransferase Propionyladenylate + CoA <=> AMP + Propanoyl-CoA+++R01354///ATP:propanoate adenylyltransferase ATP + Propanoate <=> Diphosphate + Propionyladenylate	R-MMU-77111///Synthesis of Ketone Bodies
5569413	GO:0008061///chitin binding	IPR002557///Chitin binding domain+++IPR036508///Chitin binding domain superfamily	NA	NA	NA	NA
5569414	GO:0008061///chitin binding	IPR036508///Chitin binding domain superfamily	NA	NA	NA	NA
5569491	GO:0003824///catalytic activity+++GO:0004556///alpha-amylase activity+++GO:0016787///hydrolase activity+++GO:0016798///hydrolase activity, acting on glycosyl bonds+++GO:0043169///cation binding+++GO:0103025///alpha-amylase activity (releasing maltohexaose)	IPR006046///Alpha amylase+++IPR006047///Glycosyl hydrolase, family 13, catalytic domain+++IPR006048///Alpha-amylase/branching enzyme, C-terminal all beta+++IPR013780///Glycosyl hydrolase, all-beta+++IPR017853///Glycoside hydrolase superfamily+++IPR031319///Alpha-amylase, C-terminal domain	PF00128///Alpha amylase, catalytic domain+++PF02806///Alpha amylase, C-terminal all-beta domain	00500///Starch and sucrose metabolism+++01100///Metabolic pathways+++04973///Carbohydrate digestion and absorption	R02108///1,4-alpha-D-Glucan glucanohydrolase Starch + H2O <=> Dextrin + Starch+++R02112///1,4-alpha-D-Glucan maltohydrolase Starch <=> Dextrin + Maltose+++R11262///maltodextrin maltohydrolase Maltodextrin + H2O <=> Maltose	NA
5569492	GO:0003824///catalytic activity+++GO:0004556///alpha-amylase activity+++GO:0016787///hydrolase activity+++GO:0016798///hydrolase activity, acting on glycosyl bonds+++GO:0043169///cation binding+++GO:0103025///alpha-amylase activity (releasing maltohexaose)	IPR006046///Alpha amylase+++IPR006047///Glycosyl hydrolase, family 13, catalytic domain+++IPR006048///Alpha-amylase/branching enzyme, C-terminal all beta+++IPR013780///Glycosyl hydrolase, all-beta+++IPR017853///Glycoside hydrolase superfamily+++IPR031319///Alpha-amylase, C-terminal domain	PF00128///Alpha amylase, catalytic domain+++PF02806///Alpha amylase, C-terminal all-beta domain	00500///Starch and sucrose metabolism+++01100///Metabolic pathways+++04973///Carbohydrate digestion and absorption	R02108///1,4-alpha-D-Glucan glucanohydrolase Starch + H2O <=> Dextrin + Starch+++R02112///1,4-alpha-D-Glucan maltohydrolase Starch <=> Dextrin + Maltose+++R11262///maltodextrin maltohydrolase Maltodextrin + H2O <=> Maltose	NA
5569536	GO:0008061///chitin binding	IPR002557///Chitin binding domain+++IPR036508///Chitin binding domain superfamily	PF01607///Chitin binding Peritrophin-A domain	NA	NA	NA
5570579	GO:0008061///chitin binding	IPR002557///Chitin binding domain+++IPR036508///Chitin binding domain superfamily	PF01607///Chitin binding Peritrophin-A domain	NA	NA	NA
5570640	GO:0003824///catalytic activity+++GO:0004556///alpha-amylase activity+++GO:0016787///hydrolase activity+++GO:0016798///hydrolase activity, acting on glycosyl bonds+++GO:0043169///cation binding+++GO:0103025///alpha-amylase activity (releasing maltohexaose)	IPR006046///Alpha amylase+++IPR006047///Glycosyl hydrolase, family 13, catalytic domain+++IPR006048///Alpha-amylase/branching enzyme, C-terminal all beta+++IPR013780///Glycosyl hydrolase, all-beta+++IPR017853///Glycoside hydrolase superfamily+++IPR031319///Alpha-amylase, C-terminal domain	PF00128///Alpha amylase, catalytic domain+++PF02806///Alpha amylase, C-terminal all-beta domain	00500///Starch and sucrose metabolism+++01100///Metabolic pathways+++04973///Carbohydrate digestion and absorption	R02108///1,4-alpha-D-Glucan glucanohydrolase Starch + H2O <=> Dextrin + Starch+++R02112///1,4-alpha-D-Glucan maltohydrolase Starch <=> Dextrin + Maltose+++R11262///maltodextrin maltohydrolase Maltodextrin + H2O <=> Maltose	NA
5570644	GO:0003824///catalytic activity+++GO:0004556///alpha-amylase activity+++GO:0016787///hydrolase activity+++GO:0016798///hydrolase activity, acting on glycosyl bonds+++GO:0043169///cation binding+++GO:0103025///alpha-amylase activity (releasing maltohexaose)	IPR006046///Alpha amylase+++IPR006047///Glycosyl hydrolase, family 13, catalytic domain+++IPR006048///Alpha-amylase/branching enzyme, C-terminal all beta+++IPR013780///Glycosyl hydrolase, all-beta+++IPR017853///Glycoside hydrolase superfamily+++IPR031319///Alpha-amylase, C-terminal domain	PF00128///Alpha amylase, catalytic domain+++PF02806///Alpha amylase, C-terminal all-beta domain	00500///Starch and sucrose metabolism+++01100///Metabolic pathways+++04973///Carbohydrate digestion and absorption	R02108///1,4-alpha-D-Glucan glucanohydrolase Starch + H2O <=> Dextrin + Starch+++R02112///1,4-alpha-D-Glucan maltohydrolase Starch <=> Dextrin + Maltose+++R11262///maltodextrin maltohydrolase Maltodextrin + H2O <=> Maltose	NA
5570646	GO:0003824///catalytic activity+++GO:0004556///alpha-amylase activity+++GO:0016787///hydrolase activity+++GO:0016798///hydrolase activity, acting on glycosyl bonds+++GO:0043169///cation binding+++GO:0103025///alpha-amylase activity (releasing maltohexaose)	IPR006046///Alpha amylase+++IPR006047///Glycosyl hydrolase, family 13, catalytic domain+++IPR006048///Alpha-amylase/branching enzyme, C-terminal all beta+++IPR013780///Glycosyl hydrolase, all-beta+++IPR017853///Glycoside hydrolase superfamily+++IPR031319///Alpha-amylase, C-terminal domain	PF00128///Alpha amylase, catalytic domain+++PF02806///Alpha amylase, C-terminal all-beta domain	00500///Starch and sucrose metabolism+++01100///Metabolic pathways+++04973///Carbohydrate digestion and absorption	R02108///1,4-alpha-D-Glucan glucanohydrolase Starch + H2O <=> Dextrin + Starch+++R02112///1,4-alpha-D-Glucan maltohydrolase Starch <=> Dextrin + Maltose+++R11262///maltodextrin maltohydrolase Maltodextrin + H2O <=> Maltose	NA
5570782	GO:0008061///chitin binding	IPR001223///Glycoside hydrolase family 18, catalytic domain+++IPR011583///Chitinase II+++IPR017853///Glycoside hydrolase superfamily+++IPR029070///Chitinase insertion domain superfamily	PF00704///Glycosyl hydrolases family 18	NA	NA	NA
5570898	GO:0003824///catalytic activity+++GO:0004348///glucosylceramidase activity+++GO:0004553///hydrolase activity, hydrolyzing O-glycosyl compounds	IPR006775///Glycosyl-hydrolase family 116, catalytic region+++IPR008928///Six-hairpin glycosidase superfamily+++IPR012341///Six-hairpin glycosidase-like superfamily+++IPR014551///Beta-glucosidase GBA2-type+++IPR024462///Glycosyl-hydrolase family 116, N-terminal	PF04685///Glycosyl-hydrolase family 116, catalytic region+++PF12215///beta-glucosidase 2, glycosyl-hydrolase family 116 N-term	00511///Other glycan degradation+++00600///Sphingolipid metabolism+++01100///Metabolic pathways	R01498///D-Glucosyl-N-acylsphingosine glucohydrolase beta-D-Glucosyl-(1<->1)-ceramide + H2O <=> D-Glucose + N-Acylsphingosine	R-DME-1660662///Glycosphingolipid metabolism
5571588	GO:0004553///hydrolase activity, hydrolyzing O-glycosyl compounds	IPR000757///Glycoside hydrolase family 16+++IPR013320///Concanavalin A-like lectin/glucanase domain superfamily	PF00722///Glycosyl hydrolases family 16	04624///Toll and Imd signaling pathway	NA	NA
5571709	GO:0004553///hydrolase activity, hydrolyzing O-glycosyl compounds	IPR001360///Glycoside hydrolase family 1+++IPR017853///Glycoside hydrolase superfamily+++IPR018120///Glycoside hydrolase family 1, active site+++IPR033132///Glycosyl hydrolases family 1, N-terminal conserved site	PF00232///Glycosyl hydrolase family 1	00052///Galactose metabolism+++01100///Metabolic pathways+++04973///Carbohydrate digestion and absorption	R01678///Lactose galactohydrolase Lactose + H2O <=> alpha-D-Glucose + D-Galactose+++R06114///NA Lactose + H2O <=> D-Glucose + D-Galactose	R-HSA-189085///Digestion of dietary carbohydrate+++R-HSA-5659898///Intestinal saccharidase deficiencies
5571710	GO:0004553///hydrolase activity, hydrolyzing O-glycosyl compounds	IPR001360///Glycoside hydrolase family 1+++IPR017853///Glycoside hydrolase superfamily+++IPR018120///Glycoside hydrolase family 1, active site	PF00232///Glycosyl hydrolase family 1	00052///Galactose metabolism+++01100///Metabolic pathways+++04973///Carbohydrate digestion and absorption	R01678///Lactose galactohydrolase Lactose + H2O <=> alpha-D-Glucose + D-Galactose+++R06114///NA Lactose + H2O <=> D-Glucose + D-Galactose	NA
5571731	GO:0003713///transcription coactivator activity+++GO:0004553///hydrolase activity, hydrolyzing O-glycosyl compounds	IPR001579///Glycoside hydrolase, chitinase active site+++IPR026638///Nuclear receptor coactivator 6+++IPR032715///Nuclear receptor coactivator 6, putative nucleic acid-binding region	PF13820///Putative nucleic acid-binding region	NA	NA	NA
5571922	GO:0016787///hydrolase activity	IPR000246///Peptidase T2, asparaginase 2+++IPR029055///Nucleophile aminohydrolases, N-terminal	PF01112///Asparaginase	00511///Other glycan degradation+++04142///Lysosome	NA	NA
5571998	GO:0008270///zinc ion binding+++GO:0008745///N-acetylmuramoyl-L-alanine amidase activity+++GO:0042834///peptidoglycan binding	IPR002502///N-acetylmuramoyl-L-alanine amidase domain+++IPR006619///Peptidoglycan recognition protein family domain, metazoa/bacteria+++IPR015510///Peptidoglycan recognition protein+++IPR017331///Peptidoglycan recognition protein, PGRP-S+++IPR036505///N-acetylmuramoyl-L-alanine amidase/PGRP domain superfamily	PF01510///N-acetylmuramoyl-L-alanine amidase	NA	R04112///N-Acetylmuramoyl-Ala amidohydrolase N-Acetylmuramoyl-Ala + H2O <=> N-Acetylmuramate + L-Alanine	R-DME-6798695///Neutrophil degranulation+++R-DME-6803157///Antimicrobial peptides
5572078	NA	IPR002553///Clathrin/coatomer adaptor, adaptin-like, N-terminal+++IPR008152///Clathrin adaptor, alpha/beta/gamma-adaptin, appendage, Ig-like subdomain+++IPR008153///Gamma-adaptin ear (GAE) domain+++IPR011989///Armadillo-like helical+++IPR013041///Clathrin adaptor, appendage, Ig-like subdomain superfamily+++IPR016024///Armadillo-type fold	PF01602///Adaptin N terminal region+++PF02883///Adaptin C-terminal domain	04142///Lysosome+++05170///Human immunodeficiency virus 1 infection	NA	R-MMU-2132295///MHC class II antigen presentation+++R-MMU-432720///Lysosome Vesicle Biogenesis+++R-MMU-432722///Golgi Associated Vesicle Biogenesis
5572124	GO:0008061///chitin binding	IPR002557///Chitin binding domain+++IPR036508///Chitin binding domain superfamily	PF01607///Chitin binding Peritrophin-A domain	NA	NA	NA
5572224	GO:0003824///catalytic activity+++GO:0004555///alpha,alpha-trehalase activity+++GO:0016787///hydrolase activity+++GO:0016798///hydrolase activity, acting on glycosyl bonds	IPR001661///Glycoside hydrolase, family 37+++IPR008928///Six-hairpin glycosidase superfamily+++IPR012341///Six-hairpin glycosidase-like superfamily+++IPR018232///Glycoside hydrolase, family 37, conserved site	PF01204///Trehalase	00500///Starch and sucrose metabolism+++01100///Metabolic pathways	R00010///alpha,alpha-trehalose glucohydrolase alpha,alpha-Trehalose + H2O <=> 2 D-Glucose	NA
5573490	GO:0003824///catalytic activity	IPR006047///Glycosyl hydrolase, family 13, catalytic domain+++IPR013780///Glycosyl hydrolase, all-beta+++IPR017853///Glycoside hydrolase superfamily	PF00128///Alpha amylase, catalytic domain	00052///Galactose metabolism+++00500///Starch and sucrose metabolism+++01100///Metabolic pathways	R00028///maltose glucohydrolase Maltose + H2O <=> 2 D-Glucose+++R00801///sucrose glucohydrolase Sucrose + H2O <=> D-Fructose + D-Glucose+++R00802///sucrose alpha-glucohydrolase Sucrose + H2O <=> beta-D-Fructose + alpha-D-Glucose+++R06087///NA Sucrose + H2O <=> D-Fructose + D-Glucose+++R06088///NA Sucrose + H2O <=> beta-D-Fructose + alpha-D-Glucose	NA
5573497	GO:0003824///catalytic activity	IPR006047///Glycosyl hydrolase, family 13, catalytic domain+++IPR013780///Glycosyl hydrolase, all-beta+++IPR017853///Glycoside hydrolase superfamily	PF00128///Alpha amylase, catalytic domain	00052///Galactose metabolism+++00500///Starch and sucrose metabolism+++01100///Metabolic pathways	R00028///maltose glucohydrolase Maltose + H2O <=> 2 D-Glucose+++R00801///sucrose glucohydrolase Sucrose + H2O <=> D-Fructose + D-Glucose+++R00802///sucrose alpha-glucohydrolase Sucrose + H2O <=> beta-D-Fructose + alpha-D-Glucose+++R06087///NA Sucrose + H2O <=> D-Fructose + D-Glucose+++R06088///NA Sucrose + H2O <=> beta-D-Fructose + alpha-D-Glucose	NA
5573692	GO:0004560///alpha-L-fucosidase activity+++GO:0016787///hydrolase activity+++GO:0016798///hydrolase activity, acting on glycosyl bonds	IPR000933///Glycoside hydrolase, family 29+++IPR016286///Alpha-L-fucosidase, metazoa-type+++IPR017853///Glycoside hydrolase superfamily+++IPR031919///Alpha-L-fucosidase, C-terminal	PF01120///Alpha-L-fucosidase+++PF16757///Alpha-L-fucosidase C-terminal domain	00511///Other glycan degradation	NA	R-DME-381426///Regulation of Insulin-like Growth Factor (IGF) transport and uptake by Insulin-like Growth Factor Binding Proteins (IGFBPs)+++R-DME-6798695///Neutrophil degranulation+++R-DME-8957275///Post-translational protein phosphorylation+++R-DME-975578///Reactions specific to the complex N-glycan synthesis pathway
5573729	GO:0016787///hydrolase activity+++GO:0042586///peptide deformylase activity+++GO:0046872///metal ion binding	IPR023635///Peptide deformylase+++IPR036821///Peptide deformylase superfamily	PF01327///Polypeptide deformylase	NA	NA	NA
5574162	GO:0008061///chitin binding	IPR001223///Glycoside hydrolase family 18, catalytic domain+++IPR011583///Chitinase II+++IPR017853///Glycoside hydrolase superfamily+++IPR029070///Chitinase insertion domain superfamily	PF00704///Glycosyl hydrolases family 18	00520///Amino sugar and nucleotide sugar metabolism+++01100///Metabolic pathways	R01206///[1,4-(N-Acetyl-beta-D-glucosaminyl)]n glycanohydrolase Chitin + H2O <=> N-Acetyl-D-glucosamine + Chitin+++R02334///[1,4-(N-Acetyl-beta-D-glucosaminyl)]n glycanohydrolase Chitin + H2O <=> Chitobiose + Chitin	NA
5574188	GO:0022857///transmembrane transporter activity	IPR005828///Major facilitator, sugar transporter-like+++IPR005829///Sugar transporter, conserved site+++IPR020846///Major facilitator superfamily domain+++IPR036259///MFS transporter superfamily	PF00083///Sugar (and other) transporter	NA	NA	NA
5574316	GO:0005509///calcium ion binding+++GO:0005543///phospholipid binding+++GO:0019992///diacylglycerol binding	IPR000008///C2 domain+++IPR002219///Protein kinase C-like, phorbol ester/diacylglycerol-binding domain+++IPR010439///Calcium-dependent secretion activator domain+++IPR014770///Munc13 homology 1+++IPR014772///Mammalian uncoordinated homology 13, domain 2+++IPR019558///Mammalian uncoordinated homology 13, subgroup, domain 2+++IPR027080///Protein Unc-13+++IPR035892///C2 domain superfamily+++IPR03730…	PF00130///Phorbol esters/diacylglycerol binding domain (C1 domain)+++PF00168///C2 domain+++PF06292///Domain of Unknown Function (DUF1041)+++PF10540///Munc13 (mammalian uncoordinated) homology domain	04721///Synaptic vesicle cycle	NA	R-HSA-181429///Serotonin Neurotransmitter Release Cycle+++R-HSA-181430///Norepinephrine Neurotransmitter Release Cycle+++R-HSA-210500///Glutamate Neurotransmitter Release Cycle+++R-HSA-212676///Dopamine Neurotransmitter Release Cycle+++R-HSA-264642///Acetylcholine Neurotransmitter Release Cycle
5574530	NA	IPR001680///WD40 repeat+++IPR015943///WD40/YVTN repeat-like-containing domain superfamily+++IPR017986///WD40-repeat-containing domain+++IPR019775///WD40 repeat, conserved site+++IPR036322///WD40-repeat-containing domain superfamily	NA	NA	NA	R-HSA-390471///Association of TriC/CCT with target proteins during biosynthesis+++R-HSA-8951664///Neddylation
5574694	GO:0008061///chitin binding	IPR002557///Chitin binding domain+++IPR036508///Chitin binding domain superfamily	PF01607///Chitin binding Peritrophin-A domain	NA	NA	NA
5574696	GO:0008061///chitin binding	IPR002557///Chitin binding domain+++IPR036508///Chitin binding domain superfamily	PF01607///Chitin binding Peritrophin-A domain	NA	NA	NA
5574971	GO:0004407///histone deacetylase activity+++GO:0016787///hydrolase activity+++GO:0032041///NAD-dependent histone deacetylase activity (H3-K14 specific)+++GO:0046872///metal ion binding	IPR000286///Histone deacetylase family+++IPR017320///Histone deacetylase class II, eukaryotic+++IPR023696///Ureohydrolase domain superfamily+++IPR023801///Histone deacetylase domain+++IPR037138///Histone deacetylase domain superfamily	PF00850///Histone deacetylase domain	04371///Apelin signaling pathway+++05034///Alcoholism+++05203///Viral carcinogenesis	NA	R-RNO-4090294///SUMOylation of intracellular receptors+++R-RNO-4551638///SUMOylation of chromatin organization proteins+++R-RNO-8951936///RUNX3 regulates p14-ARF
5575306	GO:0008061///chitin binding	IPR002557///Chitin binding domain+++IPR036508///Chitin binding domain superfamily	PF01607///Chitin binding Peritrophin-A domain	NA	NA	NA
5575307	GO:0008061///chitin binding	IPR002557///Chitin binding domain+++IPR036508///Chitin binding domain superfamily	PF01607///Chitin binding Peritrophin-A domain	NA	NA	NA
5575308	GO:0008061///chitin binding	IPR002557///Chitin binding domain+++IPR036508///Chitin binding domain superfamily	PF01607///Chitin binding Peritrophin-A domain	NA	NA	NA
5575309	GO:0008061///chitin binding	IPR002557///Chitin binding domain+++IPR036508///Chitin binding domain superfamily	PF01607///Chitin binding Peritrophin-A domain	NA	NA	NA
5575310	GO:0006030///chitin metabolic process	IPR002557///Chitin binding domain+++IPR036508///Chitin binding domain superfamily	PF01607///Chitin binding Peritrophin-A domain
5575311	GO:0008061///chitin binding	IPR002557///Chitin binding domain+++IPR036508///Chitin binding domain superfamily	PF01607///Chitin binding Peritrophin-A domain	NA	NA	NA
5575312	GO:0008061///chitin binding	IPR002557///Chitin binding domain+++IPR036508///Chitin binding domain superfamily	PF01607///Chitin binding Peritrophin-A domain	NA	NA	NA
5575313	GO:0008061///chitin binding	IPR002557///Chitin binding domain+++IPR036508///Chitin binding domain superfamily	PF01607///Chitin binding Peritrophin-A domain	NA	NA	NA
5575314	GO:0008061///chitin binding	IPR002557///Chitin binding domain+++IPR036508///Chitin binding domain superfamily	PF01607///Chitin binding Peritrophin-A domain	NA	NA	NA
5575523	GO:0008061///chitin binding	IPR002557///Chitin binding domain+++IPR036508///Chitin binding domain superfamily	PF01607///Chitin binding Peritrophin-A domain	04011///MAPK signaling pathway - yeast	NA	NA
5575705	GO:0008061///chitin binding	IPR002557///Chitin binding domain+++IPR036508///Chitin binding domain superfamily	PF01607///Chitin binding Peritrophin-A domain	NA	NA	NA
5575995	NA	IPR000533///Tropomyosin	PF00261///Tropomyosin+++PF12718///Tropomyosin like	04260///Cardiac muscle contraction+++04261///Adrenergic signaling in cardiomyocytes+++05206///MicroRNAs in cancer+++05410///Hypertrophic cardiomyopathy (HCM)+++05414///Dilated cardiomyopathy (DCM)	NA	R-DME-445355///Smooth Muscle Contraction
5576032	GO:0004553///hydrolase activity, hydrolyzing O-glycosyl compounds+++GO:0008061///chitin binding+++GO:0016787///hydrolase activity+++GO:0016798///hydrolase activity, acting on glycosyl bonds	IPR001223///Glycoside hydrolase family 18, catalytic domain+++IPR001579///Glycoside hydrolase, chitinase active site+++IPR002557///Chitin binding domain+++IPR011583///Chitinase II+++IPR017853///Glycoside hydrolase superfamily+++IPR029070///Chitinase insertion domain superfamily+++IPR036508///Chitin binding domain superfamily	PF00704///Glycosyl hydrolases family 18+++PF01607///Chitin binding Peritrophin-A domain	00520///Amino sugar and nucleotide sugar metabolism+++01100///Metabolic pathways	R01206///[1,4-(N-Acetyl-beta-D-glucosaminyl)]n glycanohydrolase Chitin + H2O <=> N-Acetyl-D-glucosamine + Chitin+++R02334///[1,4-(N-Acetyl-beta-D-glucosaminyl)]n glycanohydrolase Chitin + H2O <=> Chitobiose + Chitin	NA
5576373	GO:0004553///hydrolase activity, hydrolyzing O-glycosyl compounds+++GO:0008061///chitin binding+++GO:0016787///hydrolase activity+++GO:0016798///hydrolase activity, acting on glycosyl bonds	IPR001223///Glycoside hydrolase family 18, catalytic domain+++IPR001579///Glycoside hydrolase, chitinase active site+++IPR002557///Chitin binding domain+++IPR011583///Chitinase II+++IPR017853///Glycoside hydrolase superfamily+++IPR029070///Chitinase insertion domain superfamily+++IPR036508///Chitin binding domain superfamily	PF00704///Glycosyl hydrolases family 18+++PF01607///Chitin binding Peritrophin-A domain	00520///Amino sugar and nucleotide sugar metabolism+++01100///Metabolic pathways	R01206///[1,4-(N-Acetyl-beta-D-glucosaminyl)]n glycanohydrolase Chitin + H2O <=> N-Acetyl-D-glucosamine + Chitin+++R02334///[1,4-(N-Acetyl-beta-D-glucosaminyl)]n glycanohydrolase Chitin + H2O <=> Chitobiose + Chitin	NA
5576382	GO:0022857///transmembrane transporter activity	IPR005828///Major facilitator, sugar transporter-like+++IPR020846///Major facilitator superfamily domain+++IPR036259///MFS transporter superfamily	PF00083///Sugar (and other) transporter	NA	NA	NA
5576623	GO:0008061///chitin binding	IPR002557///Chitin binding domain+++IPR036508///Chitin binding domain superfamily	PF01607///Chitin binding Peritrophin-A domain	NA	NA	NA
5576624	GO:0008061///chitin binding	IPR002557///Chitin binding domain+++IPR036508///Chitin binding domain superfamily	PF01607///Chitin binding Peritrophin-A domain	NA	NA	NA
5576627	GO:0008061///chitin binding	IPR002557///Chitin binding domain+++IPR036508///Chitin binding domain superfamily	PF01607///Chitin binding Peritrophin-A domain	NA	NA	NA
5576927	GO:0003677///DNA binding+++GO:0003700///DNA-binding transcription factor activity+++GO:0043565///sequence-specific DNA binding	IPR001356///Homeobox domain+++IPR005542///PBX+++IPR009057///Homeobox-like domain superfamily+++IPR017970///Homeobox, conserved site	PF00046///Homeodomain+++PF03792///PBC domain	04927///Cortisol synthesis and secretion+++04934///Cushing syndrome+++05202///Transcriptional misregulation in cancer	NA	NA
5577056	GO:0008061///chitin binding	IPR002557///Chitin binding domain+++IPR036508///Chitin binding domain superfamily	PF01607///Chitin binding Peritrophin-A domain	04391///Hippo signaling pathway - fly+++04392///Hippo signaling pathway - multiple species	NA	NA
5577450	NA	IPR004302///Cellulose/chitin-binding protein, N-terminal	PF03067///Lytic polysaccharide mono-oxygenase, cellulose-degrading	NA	NA	NA
5577552	GO:0004568///chitinase activity	IPR000726///Glycoside hydrolase, family 19, catalytic+++IPR023346///Lysozyme-like domain superfamily	PF00182///Chitinase class I	00520///Amino sugar and nucleotide sugar metabolism+++01100///Metabolic pathways	R01206///[1,4-(N-Acetyl-beta-D-glucosaminyl)]n glycanohydrolase Chitin + H2O <=> N-Acetyl-D-glucosamine + Chitin+++R02334///[1,4-(N-Acetyl-beta-D-glucosaminyl)]n glycanohydrolase Chitin + H2O <=> Chitobiose + Chitin	NA
5577767	GO:0008061///chitin binding	IPR002557///Chitin binding domain+++IPR036508///Chitin binding domain superfamily	PF01607///Chitin binding Peritrophin-A domain	NA	NA	NA
5577801	GO:0004553///hydrolase activity, hydrolyzing O-glycosyl compounds+++GO:0008061///chitin binding	IPR001223///Glycoside hydrolase family 18, catalytic domain+++IPR001579///Glycoside hydrolase, chitinase active site+++IPR011583///Chitinase II+++IPR017853///Glycoside hydrolase superfamily+++IPR029070///Chitinase insertion domain superfamily	PF00704///Glycosyl hydrolases family 18	00520///Amino sugar and nucleotide sugar metabolism+++01100///Metabolic pathways	R01206///[1,4-(N-Acetyl-beta-D-glucosaminyl)]n glycanohydrolase Chitin + H2O <=> N-Acetyl-D-glucosamine + Chitin+++R02334///[1,4-(N-Acetyl-beta-D-glucosaminyl)]n glycanohydrolase Chitin + H2O <=> Chitobiose + Chitin	NA
5577944	GO:0003824///catalytic activity+++GO:0004556///alpha-amylase activity+++GO:0043169///cation binding+++GO:0103025///alpha-amylase activity (releasing maltohexaose)	IPR006046///Alpha amylase+++IPR006047///Glycosyl hydrolase, family 13, catalytic domain+++IPR006048///Alpha-amylase/branching enzyme, C-terminal all beta+++IPR013780///Glycosyl hydrolase, all-beta+++IPR017853///Glycoside hydrolase superfamily+++IPR031319///Alpha-amylase, C-terminal domain	PF00128///Alpha amylase, catalytic domain+++PF02806///Alpha amylase, C-terminal all-beta domain	00500///Starch and sucrose metabolism+++01100///Metabolic pathways+++04973///Carbohydrate digestion and absorption	R02108///1,4-alpha-D-Glucan glucanohydrolase Starch + H2O <=> Dextrin + Starch+++R02112///1,4-alpha-D-Glucan maltohydrolase Starch <=> Dextrin + Maltose+++R11262///maltodextrin maltohydrolase Maltodextrin + H2O <=> Maltose	NA
5578264	GO:0008061///chitin binding	IPR002557///Chitin binding domain+++IPR036508///Chitin binding domain superfamily	PF01607///Chitin binding Peritrophin-A domain	04611///Platelet activation+++04926///Relaxin signaling pathway+++04974///Protein digestion and absorption	NA	NA
5578387	GO:0003824///catalytic activity+++GO:0004571///mannosyl-oligosaccharide 1,2-alpha-mannosidase activity+++GO:0005509///calcium ion binding+++GO:0016787///hydrolase activity+++GO:0016798///hydrolase activity, acting on glycosyl bonds	IPR001382///Glycoside hydrolase family 47+++IPR012341///Six-hairpin glycosidase-like superfamily+++IPR036026///Seven-hairpin glycosidases	PF01532///Glycosyl hydrolase family 47	00510///N-Glycan biosynthesis+++00513///Various types of N-glycan biosynthesis+++01100///Metabolic pathways+++04141///Protein processing in endoplasmic reticulum	R05982///NA G00011 + 4 H2O <=> G00012 + 4 D-Mannose+++R06722///alpha 1,2-mannosyloligosaccharide alpha-D-mannohydrolase H2O + G00011 <=> D-Mannose + G10694	R-DME-964827///Progressive trimming of alpha-1,2-linked mannose residues from Man9/8/7GlcNAc2 to produce Man5GlcNAc2
5578661	GO:0008061///chitin binding	IPR002557///Chitin binding domain+++IPR036508///Chitin binding domain superfamily	PF01607///Chitin binding Peritrophin-A domain	NA	NA	NA
5578825	NA	IPR008979///Galactose-binding-like domain superfamily+++IPR017853///Glycoside hydrolase superfamily	NA	00511///Other glycan degradation+++04142///Lysosome	NA	NA
5579496	GO:0008061///chitin binding	IPR002557///Chitin binding domain+++IPR036508///Chitin binding domain superfamily	PF01607///Chitin binding Peritrophin-A domain	NA	NA	NA
5580113	GO:0004067///asparaginase activity+++GO:0016787///hydrolase activity	IPR000246///Peptidase T2, asparaginase 2+++IPR029055///Nucleophile aminohydrolases, N-terminal+++IPR033844///Asparaginase-like 1, metazoa	PF01112///Asparaginase	NA	NA	R-DME-71182///Phenylalanine and tyrosine catabolism
23687459	GO:0016491///oxidoreductase activity	IPR002347///Short-chain dehydrogenase/reductase SDR+++IPR020904///Short-chain dehydrogenase/reductase, conserved site+++IPR036291///NAD(P)-binding domain superfamily	PF00106///short chain dehydrogenase	NA	NA	NA
23687487	GO:0004190///aspartic-type endopeptidase activity+++GO:0008061///chitin binding	IPR001995///Peptidase A2A, retrovirus, catalytic+++IPR002557///Chitin binding domain+++IPR021109///Aspartic peptidase domain superfamily+++IPR036508///Chitin binding domain superfamily	PF01607///Chitin binding Peritrophin-A domain	NA	NA	NA
23687932	GO:0004553///hydrolase activity, hydrolyzing O-glycosyl compounds+++GO:0004566///beta-glucuronidase activity+++GO:0016787///hydrolase activity+++GO:0016798///hydrolase activity, acting on glycosyl bonds	IPR006101///Glycoside hydrolase, family 2+++IPR006102///Glycoside hydrolase, family 2, immunoglobulin-like beta-sandwich+++IPR006103///Glycoside hydrolase family 2, catalytic domain+++IPR006104///Glycosyl hydrolases family 2, sugar binding domain+++IPR008979///Galactose-binding-like domain superfamily+++IPR013783///Immunoglobulin-like fold+++IPR017853///Glycoside hydrolase superfamily+++IPR023230…	PF00703///Glycosyl hydrolases family 2+++PF02836///Glycosyl hydrolases family 2, TIM barrel domain+++PF02837///Glycosyl hydrolases family 2, sugar binding domain	00040///Pentose and glucuronate interconversions+++00531///Glycosaminoglycan degradation+++00860///Porphyrin and chlorophyll metabolism+++00944///Flavone and flavonol biosynthesis+++00983///Drug metabolism - other enzymes+++01100///Metabolic pathways+++01110///Biosynthesis of secondary metabolites+++04142///Lysosome	R01478///beta-D-glucuronoside glucuronosohydrolase H2O + beta-D-Glucuronoside <=> D-Glucuronate + Alcohol+++R04979///Bilirubin beta-diglucuronide glucuronosohydrolase Bilirubin beta-diglucuronide + 2 H2O + 3 Reduced acceptor <=> D-Urobilinogen + 2 D-Glucuronate + 3 Acceptor+++R07818///NA G13040 + H2O <=> G09660 + D-Glucuronate+++R08127///beta-D-glucuronoside glucuronosohydrolase Luteolin 7-O-[bet…	NA
110674054	NA	NA	NA	04151///PI3K-Akt signaling pathway+++04510///Focal adhesion+++04512///ECM-receptor interaction+++04926///Relaxin signaling pathway+++04974///Protein digestion and absorption+++04974///Protein digestion and absorption	NA	R-HSA-109688///Cleavage of Growing Transcript in the Termination Region +++R-HSA-159231///Transport of Mature mRNA Derived from an Intronless Transcript+++R-HSA-72163///mRNA Splicing - Major Pathway+++R-HSA-72187///mRNA 3'-end processing+++R-HSA-77595///Processing of Intronless Pre-mRNAs
110676201	GO:0004553///hydrolase activity, hydrolyzing O-glycosyl compounds+++GO:0016787///hydrolase activity+++GO:0016798///hydrolase activity, acting on glycosyl bonds	IPR001360///Glycoside hydrolase family 1+++IPR017853///Glycoside hydrolase superfamily+++IPR018120///Glycoside hydrolase family 1, active site+++IPR033132///Glycosyl hydrolases family 1, N-terminal conserved site	PF00232///Glycosyl hydrolase family 1	00052///Galactose metabolism+++01100///Metabolic pathways+++04973///Carbohydrate digestion and absorption	R01678///Lactose galactohydrolase Lactose + H2O <=> alpha-D-Glucose + D-Galactose+++R06114///NA Lactose + H2O <=> D-Glucose + D-Galactose	R-HSA-189085///Digestion of dietary carbohydrate+++R-HSA-5659898///Intestinal saccharidase deficiencies
110676294	GO:0003796///lysozyme activity	IPR000974///Glycoside hydrolase, family 22, lysozyme+++IPR001916///Glycoside hydrolase, family 22+++IPR019799///Glycoside hydrolase, family 22, conserved site+++IPR023346///Lysozyme-like domain superfamily	PF00062///C-type lysozyme/alpha-lactalbumin family	04970///Salivary secretion	NA	NA
110676393
110677124
110677879
110678667
110678739

## Sheet: lipid metabolism
gene_id	go_f	interpro	pfam	kegg_pathway	kegg_reaction		reactome
5563687	NA	IPR000253///Forkhead-associated (FHA) domain+++IPR008984///SMAD/FHA domain superfamily	PF00498///FHA domain	00062///Fatty acid elongation+++00140///Steroid hormone biosynthesis+++01040///Biosynthesis of unsaturated fatty acids+++01100///Metabolic pathways+++01110///Biosynthesis of secondary metabolites+++01212///Fatty acid metabolism	R02352///Estradiol-17beta:NAD+ 17-oxidoreductase Estradiol-17beta + NAD+ <=> Estrone + NADH + H++++R02353///Estradiol-17beta:NADP+ 17-oxidoreductase Estradiol-17beta + NADP+ <=> Estrone + NADPH + H++++R04681///Estriol:NAD+ 17-oxidoreductase Estriol + NAD+ <=> 16alpha-Hydroxyestrone + NADH + H++++R04682///Estriol:NADP+ 17-oxidoreductase Estriol + NADP+ <=> 16alpha-Hydroxyestrone + NADPH + H++++R07…		R-HSA-114508///Effects of PIP2 hydrolysis+++R-MMU-114508///Effects of PIP2 hydrolysis
5563729	GO:0016620///oxidoreductase activity, acting on the aldehyde or oxo group of donors, NAD or NADP as acceptor	IPR015590///Aldehyde dehydrogenase domain+++IPR016160///Aldehyde dehydrogenase, cysteine active site+++IPR016161///Aldehyde/histidinol dehydrogenase+++IPR016162///Aldehyde dehydrogenase, N-terminal+++IPR016163///Aldehyde dehydrogenase, C-terminal+++IPR029510///Aldehyde dehydrogenase, glutamic acid active site	PF00171///Aldehyde dehydrogenase family	00010///Glycolysis / Gluconeogenesis+++00053///Ascorbate and aldarate metabolism+++00071///Fatty acid degradation+++00280///Valine, leucine and isoleucine degradation+++00310///Lysine degradation+++00330///Arginine and proline metabolism+++00340///Histidine metabolism+++00380///Tryptophan metabolism+++00410///beta-Alanine metabolism+++00561///Glycerolipid metabolism+++00620///Pyruvate metabolism+…	R00264///2,5-dioxopentanoate:NADP+ 5-oxidoreductase 2,5-Dioxopentanoate + NADP+ + H2O <=> 2-Oxoglutarate + NADPH + H++++R00631///aldehyde:NAD+ oxidoreductase Aldehyde + NAD+ + H2O <=> Fatty acid + NADH + H++++R00710///Acetaldehyde:NAD+ oxidoreductase Acetaldehyde + NAD+ + H2O <=> Acetate + NADH + H++++R00904///3-aminopropanal:NAD+ oxidoreductase 3-Aminopropanal + NAD+ + H2O <=> beta-Alanine + NAD…		NA
5563762	GO:0004623///phospholipase A2 activity	IPR016090///Phospholipase A2 domain+++IPR033113///Phospholipase A2, histidine active site+++IPR036444///Phospholipase A2 domain superfamily	PF05826///Phospholipase A2	00564///Glycerophospholipid metabolism+++00565///Ether lipid metabolism+++00590///Arachidonic acid metabolism+++00591///Linoleic acid metabolism+++00592///alpha-Linolenic acid metabolism+++01100///Metabolic pathways+++01110///Biosynthesis of secondary metabolites+++04014///Ras signaling pathway+++04270///Vascular smooth muscle contraction+++04972///Pancreatic secretion+++04975///Fat digestion and…	R01315///phosphatidylcholine 2-acylhydrolase Phosphatidylcholine + H2O <=> 1-Acyl-sn-glycero-3-phosphocholine + Fatty acid+++R01317///phosphatidylcholine 2-acylhydrolase Phosphatidylcholine + H2O <=> 1-Acyl-sn-glycero-3-phosphocholine + Arachidonate+++R02053///phosphatidylethanolamine 2-acylhydrolase Phosphatidylethanolamine + H2O <=> 1-Acyl-sn-glycero-3-phosphoethanolamine + Fatty acid+++R07064/…		NA
5563869	GO:0016740///transferase activity+++GO:0102336///3-oxo-arachidoyl-CoA synthase activity+++GO:0102337///3-oxo-cerotoyl-CoA synthase activity+++GO:0102338///3-oxo-lignoceronyl-CoA synthase activity+++GO:0102756///very-long-chain 3-ketoacyl-CoA synthase activity	IPR002076///ELO family	PF01151///GNS1/SUR4 family	00062///Fatty acid elongation+++01040///Biosynthesis of unsaturated fatty acids+++01100///Metabolic pathways+++01110///Biosynthesis of secondary metabolites+++01212///Fatty acid metabolism	R09419///acyl-CoA:malonyl-CoA C-acyltransferase (decarboxylating) Malonyl-CoA + Acyl-CoA <=> 3-Oxoacyl-CoA + CoA + CO2+++R10825///very-long-chain acyl-CoA:malonyl-CoA C-acyltransferase (decarboxylating) Very-long-chain acyl-CoA + Malonyl-CoA <=> Very-long-chain 3-oxoacyl-CoA + CO2 + CoA		R-DME-192456///Digestion of dietary lipid+++R-DME-6809371///Formation of the cornified envelope
5563880	GO:0016780///phosphotransferase activity, for other substituted phosphate groups	IPR000462///CDP-alcohol phosphatidyltransferase	PF01066///CDP-alcohol phosphatidyltransferase	00564///Glycerophospholipid metabolism+++01100///Metabolic pathways	R02030///CDP-diacylglycerol:phosphatidylglycerol 3-phosphatidyltransferase Phosphatidylglycerol + CDP-diacylglycerol <=> Cardiolipin + CMP		NA
5563904	GO:0003824///catalytic activity	IPR001753///Enoyl-CoA hydratase/isomerase+++IPR014748///Enoyl-CoA hydratase, C-terminal+++IPR018376///Enoyl-CoA hydratase/isomerase, conserved site+++IPR029045///ClpP/crotonase-like domain superfamily	PF00378///Enoyl-CoA hydratase/isomerase	00062///Fatty acid elongation+++00071///Fatty acid degradation+++00280///Valine, leucine and isoleucine degradation+++00310///Lysine degradation+++00380///Tryptophan metabolism+++00410///beta-Alanine metabolism+++00627///Aminobenzoate degradation+++00640///Propanoate metabolism+++00650///Butanoate metabolism+++00930///Caprolactam degradation+++01100///Metabolic pathways+++01110///Biosynthesis of …	R02685///(3S)-3-hydroxyacyl-CoA hydro-lyase (3S)-3-Hydroxyacyl-CoA <=> trans-2,3-Dehydroacyl-CoA + H2O+++R03026///(S)-3-hydroxybutanoyl-CoA hydro-lyase (S)-3-Hydroxybutanoyl-CoA <=> Crotonoyl-CoA + H2O+++R03045///3-Hydroxypropionyl-CoA hydro-lyase 3-Hydroxypropionyl-CoA <=> Propenoyl-CoA + H2O+++R04137///3-hydroxyisovaleryl-CoA hydro-lyase 3-Hydroxyisovaleryl-CoA <=> 3-Methylcrotonyl-CoA + H2O+++…		NA
5563935	GO:0015020///glucuronosyltransferase activity+++GO:0016740///transferase activity+++GO:0016757///transferase activity, transferring glycosyl groups+++GO:0016758///transferase activity, transferring hexosyl groups	IPR002213///UDP-glucuronosyl/UDP-glucosyltransferase+++IPR035595///UDP-glycosyltransferase family, conserved site	PF00201///UDP-glucoronosyl and UDP-glucosyl transferase	00040///Pentose and glucuronate interconversions+++00053///Ascorbate and aldarate metabolism+++00140///Steroid hormone biosynthesis+++00830///Retinol metabolism+++00860///Porphyrin and chlorophyll metabolism+++00980///Metabolism of xenobiotics by cytochrome P450+++00982///Drug metabolism - cytochrome P450+++00983///Drug metabolism - other enzymes+++01100///Metabolic pathways+++01110///Biosynthesi…	R01383///UDPglucuronate beta-D-glucuronosyltransferase (acceptor-unspecific) UDP-glucuronate + ROH <=> UDP + beta-D-Glucuronoside+++R02358///UDPglucuronate beta-D-glucuronosyltransferase(acceptor-unspecific) Estrone + UDP-glucuronate <=> Estrone glucuronide + UDP+++R02389///UDPglucuronate beta-D-glucuronosyltransferase(acceptor-unspecific) 2 UDP-glucuronate + Bilirubin <=> 2 UDP + Bilirubin beta-…		NA
5563937	GO:0016740///transferase activity+++GO:0016757///transferase activity, transferring glycosyl groups+++GO:0016758///transferase activity, transferring hexosyl groups	IPR002213///UDP-glucuronosyl/UDP-glucosyltransferase+++IPR035595///UDP-glycosyltransferase family, conserved site	PF00201///UDP-glucoronosyl and UDP-glucosyl transferase	00040///Pentose and glucuronate interconversions+++00053///Ascorbate and aldarate metabolism+++00140///Steroid hormone biosynthesis+++00830///Retinol metabolism+++00860///Porphyrin and chlorophyll metabolism+++00980///Metabolism of xenobiotics by cytochrome P450+++00982///Drug metabolism - cytochrome P450+++00983///Drug metabolism - other enzymes+++01100///Metabolic pathways+++01110///Biosynthesi…	R01383///UDPglucuronate beta-D-glucuronosyltransferase (acceptor-unspecific) UDP-glucuronate + ROH <=> UDP + beta-D-Glucuronoside+++R02358///UDPglucuronate beta-D-glucuronosyltransferase(acceptor-unspecific) Estrone + UDP-glucuronate <=> Estrone glucuronide + UDP+++R02389///UDPglucuronate beta-D-glucuronosyltransferase(acceptor-unspecific) 2 UDP-glucuronate + Bilirubin <=> 2 UDP + Bilirubin beta-…		NA
5564068	GO:0052689///carboxylic ester hydrolase activity	IPR000734///Triacylglycerol lipase family+++IPR013818///Lipase/vitellogenin+++IPR029058///Alpha/Beta hydrolase fold+++IPR033906///Lipase, N-terminal	PF00151///Lipase	00561///Glycerolipid metabolism+++01100///Metabolic pathways+++04972///Pancreatic secretion+++04975///Fat digestion and absorption+++04977///Vitamin digestion and absorption	R02250///triacylglycerol acylhydrolase Triacylglycerol + H2O <=> 1,2-Diacyl-sn-glycerol + Fatty acid+++R02687///1,2-diacyl-sn-glycerol acylhydrolase 1,2-Diacyl-sn-glycerol + H2O <=> 1-Acylglycerol + Fatty acid		NA
5564084	GO:0016491///oxidoreductase activity+++GO:0080019///fatty-acyl-CoA reductase (alcohol-forming) activity+++GO:0102965///alcohol-forming fatty acyl-CoA reductase activity	IPR013120///Male sterility, NAD-binding+++IPR026055///Fatty acyl-CoA reductase+++IPR033640///Fatty acyl-CoA reductase, C-terminal+++IPR036291///NAD(P)-binding domain superfamily	PF03015///Male sterility protein+++PF07993///Male sterility protein	00073///Cutin, suberine and wax biosynthesis+++04146///Peroxisome+++04212///Longevity regulating pathway - worm	R09470///long-chain-primary-alcohol:NADP+ oxidoreductase (CoA-acylating) Long-chain acyl-CoA + 2 NADPH + 2 H+ <=> Primary alcohol + 2 NADP+ + CoA		R-MMU-1482801///Acyl chain remodelling of PS+++R-MMU-1482925///Acyl chain remodelling of PG
5564133	GO:0016491///oxidoreductase activity	IPR018170///Aldo/keto reductase, conserved site+++IPR020471///Aldo/keto reductase+++IPR023210///NADP-dependent oxidoreductase domain+++IPR036812///NADP-dependent oxidoreductase domain superfamily	PF00248///Aldo/keto reductase family	00040///Pentose and glucuronate interconversions+++00051///Fructose and mannose metabolism+++00052///Galactose metabolism+++00561///Glycerolipid metabolism+++00790///Folate biosynthesis+++01100///Metabolic pathways	R01036///Glycerol:NAD+ oxidoreductase Glycerol + NAD+ <=> D-Glyceraldehyde + NADH + H++++R01041///glycerol:NADP+ oxidoreductase Glycerol + NADP+ <=> D-Glyceraldehyde + NADPH + H++++R01093///galactitol:NAD+ 1-oxidoreductase D-Galactose + NADH + H+ <=> Galactitol + NAD++++R01095///galactitol:NADP+ 1-oxidoreductase D-Galactose + NADPH + H+ <=> Galactitol + NADP++++R01431///xylitol:NADP+ oxidoreducta…		R-DME-8848584///Wax biosynthesis
5564273	GO:0015020///glucuronosyltransferase activity+++GO:0016740///transferase activity+++GO:0016757///transferase activity, transferring glycosyl groups+++GO:0016758///transferase activity, transferring hexosyl groups	IPR002213///UDP-glucuronosyl/UDP-glucosyltransferase+++IPR035595///UDP-glycosyltransferase family, conserved site	PF00201///UDP-glucoronosyl and UDP-glucosyl transferase	00040///Pentose and glucuronate interconversions+++00053///Ascorbate and aldarate metabolism+++00140///Steroid hormone biosynthesis+++00830///Retinol metabolism+++00860///Porphyrin and chlorophyll metabolism+++00980///Metabolism of xenobiotics by cytochrome P450+++00982///Drug metabolism - cytochrome P450+++00983///Drug metabolism - other enzymes+++01100///Metabolic pathways+++01110///Biosynthesi…	R01383///UDPglucuronate beta-D-glucuronosyltransferase (acceptor-unspecific) UDP-glucuronate + ROH <=> UDP + beta-D-Glucuronoside+++R02358///UDPglucuronate beta-D-glucuronosyltransferase(acceptor-unspecific) Estrone + UDP-glucuronate <=> Estrone glucuronide + UDP+++R02389///UDPglucuronate beta-D-glucuronosyltransferase(acceptor-unspecific) 2 UDP-glucuronate + Bilirubin <=> 2 UDP + Bilirubin beta-…		NA
5564390	GO:0036374///glutathione hydrolase activity	IPR000101///Gamma-glutamyltranspeptidase+++IPR029055///Nucleophile aminohydrolases, N-terminal	PF01019///Gamma-glutamyltranspeptidase	00430///Taurine and hypotaurine metabolism+++00460///Cyanoamino acid metabolism+++00480///Glutathione metabolism+++00590///Arachidonic acid metabolism+++01100///Metabolic pathways	R00494///glutathione gamma-glutamylaminopeptidase Glutathione + H2O <=> Cys-Gly + L-Glutamate+++R01262///glutathione:L-amino-acid 5-glutamyltransferase Glutathione + L-Amino acid <=> Cys-Gly + (5-L-Glutamyl)-L-amino acid+++R01687///(5-L-glutamyl)-peptide:taurine 5-glutamyltransferase (5-L-Glutamyl)-peptide + Taurine <=> Peptide + 5-L-Glutamyl-taurine+++R03916///(5-glutamyl)-peptide:amino-acid 5-g…		NA
5564575	GO:0016787///hydrolase activity	IPR002018///Carboxylesterase, type B+++IPR019826///Carboxylesterase type B, active site+++IPR029058///Alpha/Beta hydrolase fold	PF00135///Carboxylesterase family	00564///Glycerophospholipid metabolism+++04725///Cholinergic synapse	R01026///Acetylcholine aectylhydrolase Acetylcholine + H2O <=> Choline + Acetate		R-MMU-75105///Fatty acyl-CoA biosynthesis
5565034	GO:0008146///sulfotransferase activity	IPR000863///Sulfotransferase domain+++IPR027417///P-loop containing nucleoside triphosphate hydrolase	PF00685///Sulfotransferase domain	00140///Steroid hormone biosynthesis	R02350///3'-Phosphoadenylylsulfate:estrone 3-sulfotransferase 3'-Phosphoadenylyl sulfate + Estrone <=> Adenosine 3',5'-bisphosphate + Estrone 3-sulfate		NA
5565066	GO:0004553///hydrolase activity, hydrolyzing O-glycosyl compounds+++GO:0004565///beta-galactosidase activity+++GO:0016787///hydrolase activity+++GO:0016798///hydrolase activity, acting on glycosyl bonds	IPR001944///Glycoside hydrolase, family 35+++IPR008979///Galactose-binding-like domain superfamily+++IPR017853///Glycoside hydrolase superfamily+++IPR019801///Glycoside hydrolase, family 35, conserved site+++IPR026283///Beta-galactosidase 1-like+++IPR031330///Glycoside hydrolase 35, catalytic domain	PF01301///Glycosyl hydrolases family 35	00052///Galactose metabolism+++00511///Other glycan degradation+++00531///Glycosaminoglycan degradation+++00600///Sphingolipid metabolism+++00604///Glycosphingolipid biosynthesis - ganglio series+++01100///Metabolic pathways+++04142///Lysosome	R01678///Lactose galactohydrolase Lactose + H2O <=> alpha-D-Glucose + D-Galactose+++R03355///beta-D-Galactosyl-1,4-beta-D-glucosylceramide galactohydrolase beta-D-Galactosyl-(1->4)-beta-D-glucosyl-(1<->1)-ceramide + H2O <=> beta-D-Glucosyl-(1<->1)-ceramide + D-Galactose+++R04633///D-Galactosyl-N-acetyl-D-galactosaminyl-(N-acetylneuraminyl)-D- galactosyl-D-glucosylceramide galactohydrolase D-Galac…		NA
5565282	GO:0003995///acyl-CoA dehydrogenase activity+++GO:0050660///flavin adenine dinucleotide binding	IPR006089///Acyl-CoA dehydrogenase, conserved site+++IPR006091///Acyl-CoA oxidase/dehydrogenase, central domain+++IPR009075///Acyl-CoA dehydrogenase/oxidase C-terminal+++IPR009100///Acyl-CoA dehydrogenase/oxidase, N-terminal and middle domain superfamily+++IPR013786///Acyl-CoA dehydrogenase/oxidase, N-terminal+++IPR036250///Acyl-CoA dehydrogenase-like, C-terminal+++IPR037069///Acyl-CoA dehydrogen…	PF00441///Acyl-CoA dehydrogenase, C-terminal domain+++PF02770///Acyl-CoA dehydrogenase, middle domain+++PF02771///Acyl-CoA dehydrogenase, N-terminal domain	00071///Fatty acid degradation+++00310///Lysine degradation+++00362///Benzoate degradation+++00380///Tryptophan metabolism+++01100///Metabolic pathways+++01120///Microbial metabolism in diverse environments+++01130///Biosynthesis of antibiotics	R02487///glutaryl-CoA:electron-transfer flavoprotein 2,3-oxidoreductase (decarboxylating) Glutaryl-CoA + FAD <=> FADH2 + Crotonoyl-CoA + CO2+++R02488///glutaryl-CoA:electron-transfer flavoprotein 2,3-oxidoreductase (decarboxylating) Glutaryl-CoA + Electron-transferring flavoprotein <=> Crotonoyl-CoA + Reduced electron-transferring flavoprotein + CO2+++R10074///glutaryl-CoA:electron-transfer flavo…		R-HSA-2029485///Role of phospholipids in phagocytosis
5565619	NA	IPR002347///Short-chain dehydrogenase/reductase SDR+++IPR036291///NAD(P)-binding domain superfamily	PF13561///Enoyl-(Acyl carrier protein) reductase	00140///Steroid hormone biosynthesis+++01100///Metabolic pathways	R01836///testosterone:NAD+ 17-oxidoreductase Testosterone + NAD+ <=> Androstenedione + NADH + H++++R02352///Estradiol-17beta:NAD+ 17-oxidoreductase Estradiol-17beta + NAD+ <=> Estrone + NADH + H++++R02353///Estradiol-17beta:NADP+ 17-oxidoreductase Estradiol-17beta + NADP+ <=> Estrone + NADPH + H++++R04681///Estriol:NAD+ 17-oxidoreductase Estriol + NAD+ <=> 16alpha-Hydroxyestrone + NADH + H++++R04…		R-HSA-1483115///Hydrolysis of LPC
5565636	GO:0016787///hydrolase activity+++GO:0016788///hydrolase activity, acting on ester bonds	IPR000073///Alpha/beta hydrolase fold-1+++IPR025483///Lipase, eukaryotic+++IPR029058///Alpha/Beta hydrolase fold	PF00561///alpha/beta hydrolase fold	00100///Steroid biosynthesis+++04142///Lysosome+++04979///Cholesterol metabolism	R01462///cholesterol ester acylhydrolase Cholesterol ester + H2O <=> Cholesterol + Fatty acid		R-MMU-156590///Glutathione conjugation+++R-MMU-5661270///Formation of xylulose-5-phosphate
5565704	GO:0000166///nucleotide binding+++GO:0003824///catalytic activity+++GO:0005524///ATP binding+++GO:0008444///CDP-diacylglycerol-glycerol-3-phosphate 3-phosphatidyltransferase activity+++GO:0016740///transferase activity	IPR001736///Phospholipase D/Transphosphatidylase+++IPR016270///CDP-alcohol phosphatidyltransferase class-II family+++IPR025202///Phospholipase D-like domain	PF13091///PLD-like domain	00564///Glycerophospholipid metabolism+++01100///Metabolic pathways	R01801///CDP-diacylglycerol:sn-glycerol-3-phosphate 3-phosphatidyltransferase CDP-diacylglycerol + sn-Glycerol 3-phosphate <=> CMP + Phosphatidylglycerophosphate		NA
5565720	GO:0016740///transferase activity+++GO:0102336///3-oxo-arachidoyl-CoA synthase activity+++GO:0102337///3-oxo-cerotoyl-CoA synthase activity+++GO:0102338///3-oxo-lignoceronyl-CoA synthase activity+++GO:0102756///very-long-chain 3-ketoacyl-CoA synthase activity	IPR002076///ELO family+++IPR030457///ELO family, conserved site	PF01151///GNS1/SUR4 family	00062///Fatty acid elongation+++01040///Biosynthesis of unsaturated fatty acids+++01100///Metabolic pathways+++01110///Biosynthesis of secondary metabolites+++01212///Fatty acid metabolism	R09419///acyl-CoA:malonyl-CoA C-acyltransferase (decarboxylating) Malonyl-CoA + Acyl-CoA <=> 3-Oxoacyl-CoA + CoA + CO2+++R10825///very-long-chain acyl-CoA:malonyl-CoA C-acyltransferase (decarboxylating) Very-long-chain acyl-CoA + Malonyl-CoA <=> Very-long-chain 3-oxoacyl-CoA + CO2 + CoA		NA
5565723	GO:0102336///3-oxo-arachidoyl-CoA synthase activity+++GO:0102337///3-oxo-cerotoyl-CoA synthase activity+++GO:0102338///3-oxo-lignoceronyl-CoA synthase activity+++GO:0102756///very-long-chain 3-ketoacyl-CoA synthase activity	IPR002076///ELO family+++IPR030457///ELO family, conserved site	PF01151///GNS1/SUR4 family	00062///Fatty acid elongation+++01040///Biosynthesis of unsaturated fatty acids+++01100///Metabolic pathways+++01110///Biosynthesis of secondary metabolites+++01212///Fatty acid metabolism	R09419///acyl-CoA:malonyl-CoA C-acyltransferase (decarboxylating) Malonyl-CoA + Acyl-CoA <=> 3-Oxoacyl-CoA + CoA + CO2+++R10825///very-long-chain acyl-CoA:malonyl-CoA C-acyltransferase (decarboxylating) Very-long-chain acyl-CoA + Malonyl-CoA <=> Very-long-chain 3-oxoacyl-CoA + CO2 + CoA		NA
5565724	GO:0102336///3-oxo-arachidoyl-CoA synthase activity+++GO:0102337///3-oxo-cerotoyl-CoA synthase activity+++GO:0102338///3-oxo-lignoceronyl-CoA synthase activity+++GO:0102756///very-long-chain 3-ketoacyl-CoA synthase activity	IPR002076///ELO family+++IPR030457///ELO family, conserved site	PF01151///GNS1/SUR4 family	00062///Fatty acid elongation+++01040///Biosynthesis of unsaturated fatty acids+++01100///Metabolic pathways+++01110///Biosynthesis of secondary metabolites+++01212///Fatty acid metabolism	R09419///acyl-CoA:malonyl-CoA C-acyltransferase (decarboxylating) Malonyl-CoA + Acyl-CoA <=> 3-Oxoacyl-CoA + CoA + CO2+++R10825///very-long-chain acyl-CoA:malonyl-CoA C-acyltransferase (decarboxylating) Very-long-chain acyl-CoA + Malonyl-CoA <=> Very-long-chain 3-oxoacyl-CoA + CO2 + CoA		NA
5565887	GO:0016491///oxidoreductase activity	IPR002347///Short-chain dehydrogenase/reductase SDR+++IPR020904///Short-chain dehydrogenase/reductase, conserved site+++IPR036291///NAD(P)-binding domain superfamily	PF00106///short chain dehydrogenase	00062///Fatty acid elongation+++00140///Steroid hormone biosynthesis+++01040///Biosynthesis of unsaturated fatty acids+++01100///Metabolic pathways+++01110///Biosynthesis of secondary metabolites+++01212///Fatty acid metabolism	R02352///Estradiol-17beta:NAD+ 17-oxidoreductase Estradiol-17beta + NAD+ <=> Estrone + NADH + H++++R02353///Estradiol-17beta:NADP+ 17-oxidoreductase Estradiol-17beta + NADP+ <=> Estrone + NADPH + H++++R04681///Estriol:NAD+ 17-oxidoreductase Estriol + NAD+ <=> 16alpha-Hydroxyestrone + NADH + H++++R04682///Estriol:NADP+ 17-oxidoreductase Estriol + NADP+ <=> 16alpha-Hydroxyestrone + NADPH + H++++R07…		NA
5565891	GO:0016740///transferase activity+++GO:0030170///pyridoxal phosphate binding	IPR001917///Aminotransferase, class-II, pyridoxal-phosphate binding site+++IPR004839///Aminotransferase, class I/classII+++IPR015421///Pyridoxal phosphate-dependent transferase, major domain+++IPR015422///Pyridoxal phosphate-dependent transferase domain 1+++IPR015424///Pyridoxal phosphate-dependent transferase	PF00155///Aminotransferase class I and II	00600///Sphingolipid metabolism+++01100///Metabolic pathways+++04071///Sphingolipid signaling pathway+++04138///Autophagy - yeast	R01281///Palmitoyl-CoA:L-serine C-palmitoyltransferase (decarboxylating) Palmitoyl-CoA + L-Serine <=> 3-Dehydrosphinganine + CoA + CO2		R-DME-192456///Digestion of dietary lipid+++R-DME-6809371///Formation of the cornified envelope
5565896	GO:0015020///glucuronosyltransferase activity+++GO:0016740///transferase activity+++GO:0016757///transferase activity, transferring glycosyl groups+++GO:0016758///transferase activity, transferring hexosyl groups	IPR002213///UDP-glucuronosyl/UDP-glucosyltransferase+++IPR035595///UDP-glycosyltransferase family, conserved site	PF00201///UDP-glucoronosyl and UDP-glucosyl transferase	00040///Pentose and glucuronate interconversions+++00053///Ascorbate and aldarate metabolism+++00140///Steroid hormone biosynthesis+++00830///Retinol metabolism+++00860///Porphyrin and chlorophyll metabolism+++00980///Metabolism of xenobiotics by cytochrome P450+++00982///Drug metabolism - cytochrome P450+++00983///Drug metabolism - other enzymes+++01100///Metabolic pathways+++01110///Biosynthesi…	R01383///UDPglucuronate beta-D-glucuronosyltransferase (acceptor-unspecific) UDP-glucuronate + ROH <=> UDP + beta-D-Glucuronoside+++R02358///UDPglucuronate beta-D-glucuronosyltransferase(acceptor-unspecific) Estrone + UDP-glucuronate <=> Estrone glucuronide + UDP+++R02389///UDPglucuronate beta-D-glucuronosyltransferase(acceptor-unspecific) 2 UDP-glucuronate + Bilirubin <=> 2 UDP + Bilirubin beta-…		R-DME-1442490///Collagen degradation+++R-DME-1483213///Synthesis of PE+++R-DME-71064///Lysine catabolism
5566120	GO:0003824///catalytic activity+++GO:0004553///hydrolase activity, hydrolyzing O-glycosyl compounds+++GO:0016787///hydrolase activity+++GO:0016798///hydrolase activity, acting on glycosyl bonds	IPR000111///Glycoside hydrolase family 27/36, conserved site+++IPR002241///Glycoside hydrolase, family 27+++IPR013780///Glycosyl hydrolase, all-beta+++IPR013785///Aldolase-type TIM barrel+++IPR017853///Glycoside hydrolase superfamily+++IPR035373///Alpha galactosidase A, C-terminal beta-sandwich domain	PF16499///Alpha galactosidase A+++PF17450///Alpha galactosidase A C-terminal beta sandwich domain	00052///Galactose metabolism+++00561///Glycerolipid metabolism+++00600///Sphingolipid metabolism+++00603///Glycosphingolipid biosynthesis - globo and isoglobo series+++01100///Metabolic pathways+++04142///Lysosome	R01101///melibiose galactohydrolase Melibiose + H2O <=> D-Galactose + D-Glucose+++R01103///Raffinose galactohydrolase Raffinose + H2O <=> D-Galactose + Sucrose+++R01104///Galactosylglycerol galactohydrolase 3-beta-D-Galactosyl-sn-glycerol + H2O <=> D-Galactose + Glycerol+++R01194///3-O-alpha-D-Galactosyl-1D-myo-inositol galactohydrolase; 1-alpha-D-Galactosyl-myo-inositol alpha-D-Galactosyl-(1->3)…		R-HSA-77310///Beta oxidation of lauroyl-CoA to decanoyl-CoA-CoA+++R-HSA-77346///Beta oxidation of decanoyl-CoA to octanoyl-CoA-CoA+++R-HSA-77348///Beta oxidation of octanoyl-CoA to hexanoyl-CoA+++R-HSA-77350///Beta oxidation of hexanoyl-CoA to butanoyl-CoA+++R-HSA-77352///Beta oxidation of butanoyl-CoA to acetyl-CoA+++R-MMU-77310///Beta oxidation of lauroyl-CoA to decanoyl-CoA-CoA
5566254	NA	IPR008166///Glycosyltransferase family 92	PF01697///Glycosyltransferase family 92	00564///Glycerophospholipid metabolism+++00565///Ether lipid metabolism+++00590///Arachidonic acid metabolism+++00591///Linoleic acid metabolism+++00592///alpha-Linolenic acid metabolism+++01100///Metabolic pathways+++01110///Biosynthesis of secondary metabolites+++04014///Ras signaling pathway+++04270///Vascular smooth muscle contraction+++04750///Inflammatory mediator regulation of TRP channels	R01315///phosphatidylcholine 2-acylhydrolase Phosphatidylcholine + H2O <=> 1-Acyl-sn-glycero-3-phosphocholine + Fatty acid+++R01317///phosphatidylcholine 2-acylhydrolase Phosphatidylcholine + H2O <=> 1-Acyl-sn-glycero-3-phosphocholine + Arachidonate+++R02053///phosphatidylethanolamine 2-acylhydrolase Phosphatidylethanolamine + H2O <=> 1-Acyl-sn-glycero-3-phosphoethanolamine + Fatty acid+++R07064/…		R-DME-192456///Digestion of dietary lipid+++R-DME-6809371///Formation of the cornified envelope
5566270	GO:0003854///3-beta-hydroxy-delta5-steroid dehydrogenase activity+++GO:0016616///oxidoreductase activity, acting on the CH-OH group of donors, NAD or NADP as acceptor	IPR002225///3-beta hydroxysteroid dehydrogenase/isomerase+++IPR036291///NAD(P)-binding domain superfamily	PF01073///3-beta hydroxysteroid dehydrogenase/isomerase family	00140///Steroid hormone biosynthesis+++01100///Metabolic pathways+++04913///Ovarian steroidogenesis+++04925///Aldosterone synthesis and secretion+++04927///Cortisol synthesis and secretion+++04934///Cushing syndrome	R01837///3beta-Hydroxyandrost-5-en-17-one:NAD+ 3-oxidoreductase/delta5-delta-4 isomerase Dehydroepiandrosterone + NAD+ <=> Androstenedione + NADH + H++++R02216///Pregnenolone:NAD+ 3-oxidoreductase Pregnenolone + NAD+ <=> Progesterone + NADH + H++++R02499///Testosterone delta5-delat4-isomerase; Androst-5-ene-3beta,17beta-diol:NAD+ Testosterone + H+ + NADH <=> Androstenediol + NAD++++R02840///Corti…		R-DME-6798695///Neutrophil degranulation+++R-DME-6811436///COPI-independent Golgi-to-ER retrograde traffic
5566299	GO:0016491///oxidoreductase activity+++GO:0080019///fatty-acyl-CoA reductase (alcohol-forming) activity+++GO:0102965///alcohol-forming fatty acyl-CoA reductase activity	IPR013120///Male sterility, NAD-binding+++IPR026055///Fatty acyl-CoA reductase+++IPR033640///Fatty acyl-CoA reductase, C-terminal+++IPR036291///NAD(P)-binding domain superfamily	PF03015///Male sterility protein+++PF07993///Male sterility protein	00073///Cutin, suberine and wax biosynthesis+++04146///Peroxisome+++04212///Longevity regulating pathway - worm	R09470///long-chain-primary-alcohol:NADP+ oxidoreductase (CoA-acylating) Long-chain acyl-CoA + 2 NADPH + 2 H+ <=> Primary alcohol + 2 NADP+ + CoA		NA
5566612	GO:0070840///dynein complex binding	IPR001680///WD40 repeat+++IPR006594///LIS1 homology motif+++IPR015943///WD40/YVTN repeat-like-containing domain superfamily+++IPR017252///Dynein regulator LIS1+++IPR017986///WD40-repeat-containing domain+++IPR019775///WD40 repeat, conserved site+++IPR020472///G-protein beta WD-40 repeat+++IPR036322///WD40-repeat-containing domain superfamily+++IPR037190///LIS1, N-terminal	PF00400///WD domain, G-beta repeat+++PF08513///LisH	00565///Ether lipid metabolism+++01100///Metabolic pathways	R04452///1-Alkyl-2-acetyl-sn-glycero-3-phosphocholine acetohydrolase 2-Acetyl-1-alkyl-sn-glycero-3-phosphocholine + H2O <=> 1-Organyl-2-lyso-sn-glycero-3-phosphocholine + Acetate		NA
5566800	GO:0003824///catalytic activity	IPR004821///Cytidyltransferase-like domain+++IPR014729///Rossmann-like alpha/beta/alpha sandwich fold	PF01467///Cytidylyltransferase-like	00440///Phosphonate and phosphinate metabolism+++00564///Glycerophospholipid metabolism+++01100///Metabolic pathways	R02038///CTP:ethanolamine-phosphate cytidylyltransferase CTP + Ethanolamine phosphate <=> Diphosphate + CDP-ethanolamine+++R04247///CTP:ethanolamine-phosphate cytidylyltransferase CTP + 2-Aminoethylphosphonate <=> Diphosphate + CMP-2-aminoethylphosphonate		NA
5566852	NA	IPR022742///Serine aminopeptidase, S33+++IPR029058///Alpha/Beta hydrolase fold	PF12146///Serine aminopeptidase, S33	00062///Fatty acid elongation	R01274///palmitoyl-CoA hydrolase Palmitoyl-CoA + H2O <=> CoA + Hexadecanoic acid		NA
5567182	GO:0080019///fatty-acyl-CoA reductase (alcohol-forming) activity+++GO:0102965///alcohol-forming fatty acyl-CoA reductase activity	IPR013120///Male sterility, NAD-binding+++IPR026055///Fatty acyl-CoA reductase+++IPR033640///Fatty acyl-CoA reductase, C-terminal+++IPR036291///NAD(P)-binding domain superfamily	PF03015///Male sterility protein+++PF07993///Male sterility protein	00073///Cutin, suberine and wax biosynthesis+++04146///Peroxisome+++04212///Longevity regulating pathway - worm	R09470///long-chain-primary-alcohol:NADP+ oxidoreductase (CoA-acylating) Long-chain acyl-CoA + 2 NADPH + 2 H+ <=> Primary alcohol + 2 NADP+ + CoA		R-CEL-6798163///Choline catabolism+++R-CEL-71064///Lysine catabolism
5567186	GO:0080019///fatty-acyl-CoA reductase (alcohol-forming) activity+++GO:0102965///alcohol-forming fatty acyl-CoA reductase activity	IPR013120///Male sterility, NAD-binding+++IPR026055///Fatty acyl-CoA reductase+++IPR033640///Fatty acyl-CoA reductase, C-terminal+++IPR036291///NAD(P)-binding domain superfamily	PF03015///Male sterility protein+++PF07993///Male sterility protein	00073///Cutin, suberine and wax biosynthesis+++04146///Peroxisome+++04212///Longevity regulating pathway - worm	R09470///long-chain-primary-alcohol:NADP+ oxidoreductase (CoA-acylating) Long-chain acyl-CoA + 2 NADPH + 2 H+ <=> Primary alcohol + 2 NADP+ + CoA		R-MMU-1660662///Glycosphingolipid metabolism
5567614	GO:0000062///fatty-acyl-CoA binding	IPR000582///Acyl-CoA-binding protein, ACBP+++IPR014352///FERM/acyl-CoA-binding protein superfamily+++IPR022408///Acyl-CoA-binding protein, ACBP, conserved site+++IPR035984///Acyl-CoA binding protein superfamily	PF00887///Acyl CoA binding protein	00071///Fatty acid degradation+++04146///Peroxisome	R04756///cis,cis-3,6-Dodecadienoyl-CoA delta3-cis-delta2-trans-isomerase cis,cis-3,6-Dodecadienoyl-CoA <=> trans,cis-Lauro-2,6-dienoyl-CoA		NA
5567724	NA	IPR018881///Uncharacterised protein family UPF0565	PF10561///Uncharacterised protein family UPF0565	00590///Arachidonic acid metabolism+++00790///Folate biosynthesis+++00980///Metabolism of xenobiotics by cytochrome P450+++01100///Metabolic pathways	R02581///(5Z,13E)-(15S)-9alpha,11alpha,15-trihydroxyprosta-5,13-dienoate:NADP+ 9-oxidoreductase; Prostaglandin Prostaglandin F2alpha + NADP+ <=> Prostaglandin E2 + NADPH + H++++R02975///7,8-Dihydrobiopterin:NADP+ oxidoreductase 7,8-Dihydrobiopterin + NADP+ <=> Sepiapterin + NADPH + H++++R04285///6-Lactoyl-5,6,7,8-tetrahydropterin:NADP+ 2'-oxidoreductase 6-Lactoyl-5,6,7,8-tetrahydropterin + NADP+ …		R-HSA-77108///Utilization of Ketone Bodies
5567883	GO:0008146///sulfotransferase activity	IPR000863///Sulfotransferase domain+++IPR027417///P-loop containing nucleoside triphosphate hydrolase	PF00685///Sulfotransferase domain	00140///Steroid hormone biosynthesis	R02350///3'-Phosphoadenylylsulfate:estrone 3-sulfotransferase 3'-Phosphoadenylyl sulfate + Estrone <=> Adenosine 3',5'-bisphosphate + Estrone 3-sulfate		R-MMU-163765///ChREBP activates metabolic gene expression+++R-MMU-199220///Vitamin B5 (pantothenate) metabolism+++R-MMU-75105///Fatty acyl-CoA biosynthesis
5567885	GO:0008146///sulfotransferase activity	IPR000863///Sulfotransferase domain+++IPR027417///P-loop containing nucleoside triphosphate hydrolase	PF00685///Sulfotransferase domain	00140///Steroid hormone biosynthesis	R02350///3'-Phosphoadenylylsulfate:estrone 3-sulfotransferase 3'-Phosphoadenylyl sulfate + Estrone <=> Adenosine 3',5'-bisphosphate + Estrone 3-sulfate		R-RNO-163765///ChREBP activates metabolic gene expression+++R-RNO-199220///Vitamin B5 (pantothenate) metabolism+++R-RNO-75105///Fatty acyl-CoA biosynthesis
5567887	GO:0008146///sulfotransferase activity	IPR000863///Sulfotransferase domain+++IPR027417///P-loop containing nucleoside triphosphate hydrolase	PF00685///Sulfotransferase domain	00140///Steroid hormone biosynthesis	R02350///3'-Phosphoadenylylsulfate:estrone 3-sulfotransferase 3'-Phosphoadenylyl sulfate + Estrone <=> Adenosine 3',5'-bisphosphate + Estrone 3-sulfate		R-RNO-1660661///Sphingolipid de novo biosynthesis
5567893	GO:0008146///sulfotransferase activity	IPR000863///Sulfotransferase domain+++IPR027417///P-loop containing nucleoside triphosphate hydrolase	PF00685///Sulfotransferase domain	00140///Steroid hormone biosynthesis	R02350///3'-Phosphoadenylylsulfate:estrone 3-sulfotransferase 3'-Phosphoadenylyl sulfate + Estrone <=> Adenosine 3',5'-bisphosphate + Estrone 3-sulfate		R-DME-75896///Plasmalogen biosynthesis+++R-DME-9033241///Peroxisomal protein import
5568049	GO:0016491///oxidoreductase activity	IPR002347///Short-chain dehydrogenase/reductase SDR+++IPR020904///Short-chain dehydrogenase/reductase, conserved site+++IPR036291///NAD(P)-binding domain superfamily	PF00106///short chain dehydrogenase	00062///Fatty acid elongation+++00140///Steroid hormone biosynthesis+++01040///Biosynthesis of unsaturated fatty acids+++01100///Metabolic pathways+++01110///Biosynthesis of secondary metabolites+++01212///Fatty acid metabolism	R02352///Estradiol-17beta:NAD+ 17-oxidoreductase Estradiol-17beta + NAD+ <=> Estrone + NADH + H++++R02353///Estradiol-17beta:NADP+ 17-oxidoreductase Estradiol-17beta + NADP+ <=> Estrone + NADPH + H++++R04681///Estriol:NAD+ 17-oxidoreductase Estriol + NAD+ <=> 16alpha-Hydroxyestrone + NADH + H++++R04682///Estriol:NADP+ 17-oxidoreductase Estriol + NADP+ <=> 16alpha-Hydroxyestrone + NADPH + H++++R07…		R-DME-1483148///Synthesis of PG+++R-DME-1483226///Synthesis of PI
5568202	GO:0003824///catalytic activity+++GO:0016740///transferase activity+++GO:0016746///transferase activity, transferring acyl groups+++GO:0016747///transferase activity, transferring acyl groups other than amino-acyl groups	IPR002155///Thiolase+++IPR016039///Thiolase-like+++IPR020613///Thiolase, conserved site+++IPR020615///Thiolase, acyl-enzyme intermediate active site+++IPR020616///Thiolase, N-terminal+++IPR020617///Thiolase, C-terminal	PF00108///Thiolase, N-terminal domain+++PF02803///Thiolase, C-terminal domain	00071///Fatty acid degradation+++00072///Synthesis and degradation of ketone bodies+++00280///Valine, leucine and isoleucine degradation+++00310///Lysine degradation+++00362///Benzoate degradation+++00380///Tryptophan metabolism+++00620///Pyruvate metabolism+++00630///Glyoxylate and dicarboxylate metabolism+++00640///Propanoate metabolism+++00650///Butanoate metabolism+++00720///Carbon fixation p…	R00238///acetyl-CoA:acetyl-CoA C-acetyltransferase 2 Acetyl-CoA <=> CoA + Acetoacetyl-CoA+++R01177///butanoyl-CoA:acetyl-CoA C-butanoyltransferase Acetyl-CoA + Butanoyl-CoA <=> CoA + 3-Oxohexanoyl-CoA		NA
5568375	GO:0052689///carboxylic ester hydrolase activity	IPR000734///Triacylglycerol lipase family+++IPR013818///Lipase/vitellogenin+++IPR029058///Alpha/Beta hydrolase fold	PF00151///Lipase	00561///Glycerolipid metabolism+++01100///Metabolic pathways+++04972///Pancreatic secretion+++04975///Fat digestion and absorption+++04977///Vitamin digestion and absorption	R02250///triacylglycerol acylhydrolase Triacylglycerol + H2O <=> 1,2-Diacyl-sn-glycerol + Fatty acid+++R02687///1,2-diacyl-sn-glycerol acylhydrolase 1,2-Diacyl-sn-glycerol + H2O <=> 1-Acylglycerol + Fatty acid		R-HSA-1660661///Sphingolipid de novo biosynthesis
5568498	GO:0003824///catalytic activity+++GO:0016740///transferase activity+++GO:0016746///transferase activity, transferring acyl groups+++GO:0016747///transferase activity, transferring acyl groups other than amino-acyl groups	IPR002155///Thiolase+++IPR016039///Thiolase-like+++IPR020610///Thiolase, active site+++IPR020613///Thiolase, conserved site+++IPR020615///Thiolase, acyl-enzyme intermediate active site+++IPR020616///Thiolase, N-terminal+++IPR020617///Thiolase, C-terminal	PF00108///Thiolase, N-terminal domain+++PF02803///Thiolase, C-terminal domain	00071///Fatty acid degradation+++00072///Synthesis and degradation of ketone bodies+++00280///Valine, leucine and isoleucine degradation+++00310///Lysine degradation+++00362///Benzoate degradation+++00380///Tryptophan metabolism+++00620///Pyruvate metabolism+++00630///Glyoxylate and dicarboxylate metabolism+++00640///Propanoate metabolism+++00650///Butanoate metabolism+++00720///Carbon fixation p…	R00238///acetyl-CoA:acetyl-CoA C-acetyltransferase 2 Acetyl-CoA <=> CoA + Acetoacetyl-CoA+++R01177///butanoyl-CoA:acetyl-CoA C-butanoyltransferase Acetyl-CoA + Butanoyl-CoA <=> CoA + 3-Oxohexanoyl-CoA		NA
5568635	NA	IPR000326///Phosphatidic acid phosphatase type 2/haloperoxidase+++IPR036938///Phosphatidic acid phosphatase type 2/haloperoxidase superfamily	PF01569///PAP2 superfamily	00561///Glycerolipid metabolism+++00564///Glycerophospholipid metabolism+++00565///Ether lipid metabolism+++00600///Sphingolipid metabolism+++01100///Metabolic pathways+++01110///Biosynthesis of secondary metabolites+++04072///Phospholipase D signaling pathway+++04666///Fc gamma R-mediated phagocytosis+++04975///Fat digestion and absorption	R02239///1,2-diacyl-sn-glycerol 3-phosphate phosphohydrolase Phosphatidate + H2O <=> 1,2-Diacyl-sn-glycerol + Orthophosphate+++R04162///1-Alkyl-2-acyl-sn-glycero-3-phosphate phosphohydrolase 2-Acyl-1-alkyl-sn-glycero-3-phosphate + H2O <=> 1-Alkyl-2-acylglycerol + Orthophosphate+++R06520///3-sn-phosphatidate phosphohydrolase Sphinganine 1-phosphate + H2O <=> Sphinganine + Orthophosphate+++R06521//…		R-MMU-75109///Triglyceride biosynthesis
5568636	NA	IPR000326///Phosphatidic acid phosphatase type 2/haloperoxidase+++IPR036938///Phosphatidic acid phosphatase type 2/haloperoxidase superfamily	PF01569///PAP2 superfamily	00561///Glycerolipid metabolism+++00564///Glycerophospholipid metabolism+++00565///Ether lipid metabolism+++00600///Sphingolipid metabolism+++01100///Metabolic pathways+++01110///Biosynthesis of secondary metabolites+++04072///Phospholipase D signaling pathway+++04666///Fc gamma R-mediated phagocytosis+++04975///Fat digestion and absorption	R02239///1,2-diacyl-sn-glycerol 3-phosphate phosphohydrolase Phosphatidate + H2O <=> 1,2-Diacyl-sn-glycerol + Orthophosphate+++R04162///1-Alkyl-2-acyl-sn-glycero-3-phosphate phosphohydrolase 2-Acyl-1-alkyl-sn-glycero-3-phosphate + H2O <=> 1-Alkyl-2-acylglycerol + Orthophosphate+++R06520///3-sn-phosphatidate phosphohydrolase Sphinganine 1-phosphate + H2O <=> Sphinganine + Orthophosphate+++R06521//…		NA
5568692	GO:0052689///carboxylic ester hydrolase activity	IPR000734///Triacylglycerol lipase family+++IPR013818///Lipase/vitellogenin+++IPR029058///Alpha/Beta hydrolase fold+++IPR033906///Lipase, N-terminal	PF00151///Lipase	00561///Glycerolipid metabolism+++01100///Metabolic pathways+++04972///Pancreatic secretion+++04975///Fat digestion and absorption+++04977///Vitamin digestion and absorption	R02250///triacylglycerol acylhydrolase Triacylglycerol + H2O <=> 1,2-Diacyl-sn-glycerol + Fatty acid+++R02687///1,2-diacyl-sn-glycerol acylhydrolase 1,2-Diacyl-sn-glycerol + H2O <=> 1-Acylglycerol + Fatty acid		R-DME-1660662///Glycosphingolipid metabolism
5568700	GO:0052689///carboxylic ester hydrolase activity	IPR000734///Triacylglycerol lipase family+++IPR013818///Lipase/vitellogenin+++IPR029058///Alpha/Beta hydrolase fold+++IPR033906///Lipase, N-terminal	PF00151///Lipase	00561///Glycerolipid metabolism+++01100///Metabolic pathways+++04972///Pancreatic secretion+++04975///Fat digestion and absorption+++04977///Vitamin digestion and absorption	R02250///triacylglycerol acylhydrolase Triacylglycerol + H2O <=> 1,2-Diacyl-sn-glycerol + Fatty acid+++R02687///1,2-diacyl-sn-glycerol acylhydrolase 1,2-Diacyl-sn-glycerol + H2O <=> 1-Acylglycerol + Fatty acid		NA
5568895	GO:0016491///oxidoreductase activity+++GO:0080019///fatty-acyl-CoA reductase (alcohol-forming) activity+++GO:0102965///alcohol-forming fatty acyl-CoA reductase activity	IPR013120///Male sterility, NAD-binding+++IPR026055///Fatty acyl-CoA reductase+++IPR033640///Fatty acyl-CoA reductase, C-terminal+++IPR036291///NAD(P)-binding domain superfamily	PF03015///Male sterility protein+++PF07993///Male sterility protein	00073///Cutin, suberine and wax biosynthesis+++04146///Peroxisome+++04212///Longevity regulating pathway - worm	R09470///long-chain-primary-alcohol:NADP+ oxidoreductase (CoA-acylating) Long-chain acyl-CoA + 2 NADPH + 2 H+ <=> Primary alcohol + 2 NADP+ + CoA		NA
5568896	GO:0016491///oxidoreductase activity+++GO:0080019///fatty-acyl-CoA reductase (alcohol-forming) activity+++GO:0102965///alcohol-forming fatty acyl-CoA reductase activity	IPR013120///Male sterility, NAD-binding+++IPR026055///Fatty acyl-CoA reductase+++IPR033640///Fatty acyl-CoA reductase, C-terminal+++IPR036291///NAD(P)-binding domain superfamily	PF03015///Male sterility protein+++PF07993///Male sterility protein	00073///Cutin, suberine and wax biosynthesis+++04146///Peroxisome+++04212///Longevity regulating pathway - worm	R09470///long-chain-primary-alcohol:NADP+ oxidoreductase (CoA-acylating) Long-chain acyl-CoA + 2 NADPH + 2 H+ <=> Primary alcohol + 2 NADP+ + CoA		NA
5568897	GO:0004768///stearoyl-CoA 9-desaturase activity+++GO:0016491///oxidoreductase activity+++GO:0016717///oxidoreductase activity, acting on paired donors, with oxidation of a pair of donors resulting in the reduction of molecular oxygen to two molecules of water	IPR005804///Fatty acid desaturase domain+++IPR009160///Acyl-CoA desaturase, haem/steroid binding domain-containing+++IPR015876///Acyl-CoA desaturase	PF00487///Fatty acid desaturase	01040///Biosynthesis of unsaturated fatty acids+++01212///Fatty acid metabolism+++03320///PPAR signaling pathway+++04152///AMPK signaling pathway+++04212///Longevity regulating pathway - worm	R02222///steroyl-CoA,hydrogen-donor:oxygen oxidoreductase Stearoyl-CoA + 2 Ferrocytochrome b5 + Oxygen + 2 H+ <=> Oleoyl-CoA + 2 Ferricytochrome b5 + 2 H2O+++R12173///palmitoyl-CoA,ferrocytochrome-b5:oxygen oxidoreductase (9,10-dehydrogenating) Palmitoyl-CoA + 2 Ferrocytochrome b5 + Oxygen + 2 H+ <=> Palmitoleoyl-CoA + 2 Ferricytochrome b5 + 2 H2O		NA
5569007	GO:0080019///fatty-acyl-CoA reductase (alcohol-forming) activity+++GO:0102965///alcohol-forming fatty acyl-CoA reductase activity	IPR013120///Male sterility, NAD-binding+++IPR026055///Fatty acyl-CoA reductase+++IPR033640///Fatty acyl-CoA reductase, C-terminal+++IPR036291///NAD(P)-binding domain superfamily	PF03015///Male sterility protein+++PF07993///Male sterility protein	00073///Cutin, suberine and wax biosynthesis+++04146///Peroxisome+++04212///Longevity regulating pathway - worm	R09470///long-chain-primary-alcohol:NADP+ oxidoreductase (CoA-acylating) Long-chain acyl-CoA + 2 NADPH + 2 H+ <=> Primary alcohol + 2 NADP+ + CoA		R-DME-8848584///Wax biosynthesis
5569266	GO:0016491///oxidoreductase activity+++GO:0016717///oxidoreductase activity, acting on paired donors, with oxidation of a pair of donors resulting in the reduction of molecular oxygen to two molecules of water	IPR005804///Fatty acid desaturase domain+++IPR015876///Acyl-CoA desaturase	PF00487///Fatty acid desaturase	01040///Biosynthesis of unsaturated fatty acids+++01212///Fatty acid metabolism+++03320///PPAR signaling pathway+++04152///AMPK signaling pathway+++04212///Longevity regulating pathway - worm	R02222///steroyl-CoA,hydrogen-donor:oxygen oxidoreductase Stearoyl-CoA + 2 Ferrocytochrome b5 + Oxygen + 2 H+ <=> Oleoyl-CoA + 2 Ferricytochrome b5 + 2 H2O+++R12173///palmitoyl-CoA,ferrocytochrome-b5:oxygen oxidoreductase (9,10-dehydrogenating) Palmitoyl-CoA + 2 Ferrocytochrome b5 + Oxygen + 2 H+ <=> Palmitoleoyl-CoA + 2 Ferricytochrome b5 + 2 H2O		R-DME-75105///Fatty acyl-CoA biosynthesis
5569445	GO:0008474///palmitoyl-(protein) hydrolase activity+++GO:0016790///thiolester hydrolase activity+++GO:0098599///palmitoyl hydrolase activity	IPR002472///Palmitoyl protein thioesterase+++IPR029058///Alpha/Beta hydrolase fold+++IPR030295///Lysosomal thioesterase PPT2	PF02089///Palmitoyl protein thioesterase	00062///Fatty acid elongation+++01100///Metabolic pathways+++01212///Fatty acid metabolism+++04142///Lysosome	R01274///palmitoyl-CoA hydrolase Palmitoyl-CoA + H2O <=> CoA + Hexadecanoic acid		R-MMU-75105///Fatty acyl-CoA biosynthesis
5570152	GO:0080019///fatty-acyl-CoA reductase (alcohol-forming) activity+++GO:0102965///alcohol-forming fatty acyl-CoA reductase activity	IPR013120///Male sterility, NAD-binding+++IPR026055///Fatty acyl-CoA reductase+++IPR033640///Fatty acyl-CoA reductase, C-terminal+++IPR036291///NAD(P)-binding domain superfamily	PF03015///Male sterility protein+++PF07993///Male sterility protein	00073///Cutin, suberine and wax biosynthesis+++04146///Peroxisome+++04212///Longevity regulating pathway - worm	R09470///long-chain-primary-alcohol:NADP+ oxidoreductase (CoA-acylating) Long-chain acyl-CoA + 2 NADPH + 2 H+ <=> Primary alcohol + 2 NADP+ + CoA		R-DME-8848584///Wax biosynthesis
5570229	GO:0003824///catalytic activity+++GO:0004312///fatty acid synthase activity+++GO:0016491///oxidoreductase activity+++GO:0016740///transferase activity+++GO:0016788///hydrolase activity, acting on ester bonds+++GO:0031177///phosphopantetheine binding	IPR001031///Thioesterase+++IPR001227///Acyl transferase domain superfamily+++IPR009081///Phosphopantetheine binding ACP domain+++IPR011032///GroES-like superfamily+++IPR013968///Polyketide synthase, ketoreductase domain+++IPR014030///Beta-ketoacyl synthase, N-terminal+++IPR014031///Beta-ketoacyl synthase, C-terminal+++IPR014043///Acyl transferase+++IPR016035///Acyl transferase/acyl hydrolase/lyso…	PF00109///Beta-ketoacyl synthase, N-terminal domain+++PF00550///Phosphopantetheine attachment site+++PF00698///Acyl transferase domain+++PF00975///Thioesterase domain+++PF02801///Beta-ketoacyl synthase, C-terminal domain+++PF08659///KR domain+++PF13602///Zinc-binding dehydrogenase+++PF14765///Polyketide synthase dehydratase+++PF16197///Ketoacyl-synthetase C-terminal extension	00061///Fatty acid biosynthesis+++01100///Metabolic pathways+++01212///Fatty acid metabolism+++04152///AMPK signaling pathway+++04910///Insulin signaling pathway	R01404///acyl-[acyl-carrier protein]:NADP+ oxidoreductase Acyl-[acyl-carrier protein] + NADP+ <=> trans-2,3-Dehydroacyl-[acyl-carrier protein] + NADPH + H++++R01624///acetyl-CoA:[acyl-carrier-protein] S-acetyltransferase Acetyl-CoA + Acyl-carrier protein <=> CoA + Acetyl-[acyl-carrier protein]+++R01626///Malonyl-CoA:[acyl-carrier-protein] S-malonyltransferase Malonyl-CoA + Acyl-carrier protein <=…		NA
5570274	GO:0016740///transferase activity+++GO:0102336///3-oxo-arachidoyl-CoA synthase activity+++GO:0102337///3-oxo-cerotoyl-CoA synthase activity+++GO:0102338///3-oxo-lignoceronyl-CoA synthase activity+++GO:0102756///very-long-chain 3-ketoacyl-CoA synthase activity	IPR002076///ELO family+++IPR030457///ELO family, conserved site	PF01151///GNS1/SUR4 family	00062///Fatty acid elongation+++01040///Biosynthesis of unsaturated fatty acids+++01100///Metabolic pathways+++01110///Biosynthesis of secondary metabolites+++01212///Fatty acid metabolism	R09419///acyl-CoA:malonyl-CoA C-acyltransferase (decarboxylating) Malonyl-CoA + Acyl-CoA <=> 3-Oxoacyl-CoA + CoA + CO2+++R10825///very-long-chain acyl-CoA:malonyl-CoA C-acyltransferase (decarboxylating) Very-long-chain acyl-CoA + Malonyl-CoA <=> Very-long-chain 3-oxoacyl-CoA + CO2 + CoA		R-DME-8848584///Wax biosynthesis
5570298	GO:0052689///carboxylic ester hydrolase activity	IPR000734///Triacylglycerol lipase family+++IPR013818///Lipase/vitellogenin+++IPR029058///Alpha/Beta hydrolase fold+++IPR033906///Lipase, N-terminal	PF00151///Lipase	00561///Glycerolipid metabolism+++01100///Metabolic pathways+++04972///Pancreatic secretion+++04975///Fat digestion and absorption+++04977///Vitamin digestion and absorption	R02250///triacylglycerol acylhydrolase Triacylglycerol + H2O <=> 1,2-Diacyl-sn-glycerol + Fatty acid+++R02687///1,2-diacyl-sn-glycerol acylhydrolase 1,2-Diacyl-sn-glycerol + H2O <=> 1-Acylglycerol + Fatty acid		R-DME-8848584///Wax biosynthesis
5570789	GO:0015020///glucuronosyltransferase activity+++GO:0016740///transferase activity+++GO:0016757///transferase activity, transferring glycosyl groups+++GO:0016758///transferase activity, transferring hexosyl groups	IPR002213///UDP-glucuronosyl/UDP-glucosyltransferase+++IPR035595///UDP-glycosyltransferase family, conserved site	PF00201///UDP-glucoronosyl and UDP-glucosyl transferase	00040///Pentose and glucuronate interconversions+++00053///Ascorbate and aldarate metabolism+++00140///Steroid hormone biosynthesis+++00830///Retinol metabolism+++00860///Porphyrin and chlorophyll metabolism+++00980///Metabolism of xenobiotics by cytochrome P450+++00982///Drug metabolism - cytochrome P450+++00983///Drug metabolism - other enzymes+++01100///Metabolic pathways+++01110///Biosynthesi…	R01383///UDPglucuronate beta-D-glucuronosyltransferase (acceptor-unspecific) UDP-glucuronate + ROH <=> UDP + beta-D-Glucuronoside+++R02358///UDPglucuronate beta-D-glucuronosyltransferase(acceptor-unspecific) Estrone + UDP-glucuronate <=> Estrone glucuronide + UDP+++R02389///UDPglucuronate beta-D-glucuronosyltransferase(acceptor-unspecific) 2 UDP-glucuronate + Bilirubin <=> 2 UDP + Bilirubin beta-…		NA
5570898	GO:0003824///catalytic activity+++GO:0004348///glucosylceramidase activity+++GO:0004553///hydrolase activity, hydrolyzing O-glycosyl compounds	IPR006775///Glycosyl-hydrolase family 116, catalytic region+++IPR008928///Six-hairpin glycosidase superfamily+++IPR012341///Six-hairpin glycosidase-like superfamily+++IPR014551///Beta-glucosidase GBA2-type+++IPR024462///Glycosyl-hydrolase family 116, N-terminal	PF04685///Glycosyl-hydrolase family 116, catalytic region+++PF12215///beta-glucosidase 2, glycosyl-hydrolase family 116 N-term	00511///Other glycan degradation+++00600///Sphingolipid metabolism+++01100///Metabolic pathways	R01498///D-Glucosyl-N-acylsphingosine glucohydrolase beta-D-Glucosyl-(1<->1)-ceramide + H2O <=> D-Glucose + N-Acylsphingosine		NA
5571019	GO:0016740///transferase activity+++GO:0016758///transferase activity, transferring hexosyl groups	IPR002213///UDP-glucuronosyl/UDP-glucosyltransferase	PF00201///UDP-glucoronosyl and UDP-glucosyl transferase	00040///Pentose and glucuronate interconversions+++00053///Ascorbate and aldarate metabolism+++00140///Steroid hormone biosynthesis+++00830///Retinol metabolism+++00860///Porphyrin and chlorophyll metabolism+++00980///Metabolism of xenobiotics by cytochrome P450+++00982///Drug metabolism - cytochrome P450+++00983///Drug metabolism - other enzymes+++01100///Metabolic pathways+++01110///Biosynthesi…	R01383///UDPglucuronate beta-D-glucuronosyltransferase (acceptor-unspecific) UDP-glucuronate + ROH <=> UDP + beta-D-Glucuronoside+++R02358///UDPglucuronate beta-D-glucuronosyltransferase(acceptor-unspecific) Estrone + UDP-glucuronate <=> Estrone glucuronide + UDP+++R02389///UDPglucuronate beta-D-glucuronosyltransferase(acceptor-unspecific) 2 UDP-glucuronate + Bilirubin <=> 2 UDP + Bilirubin beta-…		NA
5571189	GO:0016747///transferase activity, transferring acyl groups other than amino-acyl groups	IPR007130///Diacylglycerol acyltransferase	PF03982///Diacylglycerol acyltransferase	00561///Glycerolipid metabolism+++04975///Fat digestion and absorption	R03755///acyl-CoA:2-acylglycerol O-acyltransferase Acyl-CoA + 1-Acylglycerol <=> CoA + 1,2-Diacyl-sn-glycerol+++R03756///2,3-dehydroacyl-CoA:2-acylglycerol O-acyltransferase 2,3-Dehydroacyl-CoA + 1-Acylglycerol <=> CoA + 1,2-Diacyl-sn-glycerol		NA
5571203	GO:0008146///sulfotransferase activity	IPR000863///Sulfotransferase domain+++IPR027417///P-loop containing nucleoside triphosphate hydrolase	PF00685///Sulfotransferase domain	00140///Steroid hormone biosynthesis	R02350///3'-Phosphoadenylylsulfate:estrone 3-sulfotransferase 3'-Phosphoadenylyl sulfate + Estrone <=> Adenosine 3',5'-bisphosphate + Estrone 3-sulfate		R-MMU-191273///Cholesterol biosynthesis
5571461	GO:0003677///DNA binding	IPR001356///Homeobox domain+++IPR006634///TRAM/LAG1/CLN8 homology domain+++IPR009057///Homeobox-like domain superfamily+++IPR016439///Sphingosine N-acyltransferase Lag1/Lac1-like	PF00046///Homeodomain+++PF03798///TLC domain	00600///Sphingolipid metabolism+++01100///Metabolic pathways+++04071///Sphingolipid signaling pathway	R01496///acyl-CoA:sphingosine N-acyltransferase Acyl-CoA + Sphingosine <=> CoA + N-Acylsphingosine+++R06517///acyl-CoA:sphingosine N-acyltransferase Acyl-CoA + Sphinganine <=> CoA + Dihydroceramide		NA
5572161	GO:0016740///transferase activity+++GO:0102336///3-oxo-arachidoyl-CoA synthase activity+++GO:0102337///3-oxo-cerotoyl-CoA synthase activity+++GO:0102338///3-oxo-lignoceronyl-CoA synthase activity+++GO:0102756///very-long-chain 3-ketoacyl-CoA synthase activity	IPR002076///ELO family	PF01151///GNS1/SUR4 family	00062///Fatty acid elongation+++01040///Biosynthesis of unsaturated fatty acids+++01100///Metabolic pathways+++01110///Biosynthesis of secondary metabolites+++01212///Fatty acid metabolism	R09419///acyl-CoA:malonyl-CoA C-acyltransferase (decarboxylating) Malonyl-CoA + Acyl-CoA <=> 3-Oxoacyl-CoA + CoA + CO2+++R10825///very-long-chain acyl-CoA:malonyl-CoA C-acyltransferase (decarboxylating) Very-long-chain acyl-CoA + Malonyl-CoA <=> Very-long-chain 3-oxoacyl-CoA + CO2 + CoA		R-RNO-70895///Branched-chain amino acid catabolism
5573011	GO:0004605///phosphatidate cytidylyltransferase activity+++GO:0016740///transferase activity+++GO:0016772///transferase activity, transferring phosphorus-containing groups+++GO:0016779///nucleotidyltransferase activity	IPR000374///Phosphatidate cytidylyltransferase+++IPR016720///Phosphatidate cytidylyltransferase, eukaryota	PF01148///Cytidylyltransferase family	00564///Glycerophospholipid metabolism+++01100///Metabolic pathways+++01110///Biosynthesis of secondary metabolites+++04070///Phosphatidylinositol signaling system	R01799///CTP:phosphatidate cytidyltransferase CTP + Phosphatidate <=> Diphosphate + CDP-diacylglycerol		NA
5573336	GO:0003824///catalytic activity+++GO:0008609///alkylglycerone-phosphate synthase activity+++GO:0016491///oxidoreductase activity+++GO:0016740///transferase activity+++GO:0050660///flavin adenine dinucleotide binding+++GO:0071949///FAD binding	IPR004113///FAD-linked oxidase, C-terminal+++IPR006094///FAD linked oxidase, N-terminal+++IPR016164///FAD-linked oxidase-like, C-terminal+++IPR016166///FAD-binding domain, PCMH-type+++IPR016169///FAD-binding, type PCMH, subdomain 2+++IPR016171///Vanillyl-alcohol oxidase, C-terminal subdomain 2+++IPR025650///Alkyldihydroxyacetonephosphate synthase+++IPR036318///FAD-binding, type PCMH-like superfam…	PF01565///FAD binding domain +++PF02913///FAD linked oxidases, C-terminal domain	00565///Ether lipid metabolism+++01100///Metabolic pathways+++04146///Peroxisome	R04311///1-Acyl-glycerone-3-phosphate:long-chain-alcohol O-3-phospho-2-oxopropanyltransferase Acylglycerone phosphate + Long-chain alcohol <=> O-Alkylglycerone phosphate + Long-chain acid anion		R-GGA-156584///Cytosolic sulfonation of small molecules
5573625	GO:0003824///catalytic activity+++GO:0030170///pyridoxal phosphate binding	IPR004839///Aminotransferase, class I/classII+++IPR015421///Pyridoxal phosphate-dependent transferase, major domain+++IPR015422///Pyridoxal phosphate-dependent transferase domain 1+++IPR015424///Pyridoxal phosphate-dependent transferase	PF00155///Aminotransferase class I and II	00600///Sphingolipid metabolism+++01100///Metabolic pathways+++04071///Sphingolipid signaling pathway+++04138///Autophagy - yeast	R01281///Palmitoyl-CoA:L-serine C-palmitoyltransferase (decarboxylating) Palmitoyl-CoA + L-Serine <=> 3-Dehydrosphinganine + CoA + CO2		NA
5573927	GO:0003824///catalytic activity+++GO:0004312///fatty acid synthase activity+++GO:0016491///oxidoreductase activity+++GO:0016740///transferase activity+++GO:0016788///hydrolase activity, acting on ester bonds+++GO:0031177///phosphopantetheine binding	IPR001031///Thioesterase+++IPR001227///Acyl transferase domain superfamily+++IPR009081///Phosphopantetheine binding ACP domain+++IPR011032///GroES-like superfamily+++IPR013149///Alcohol dehydrogenase, C-terminal+++IPR013968///Polyketide synthase, ketoreductase domain+++IPR014030///Beta-ketoacyl synthase, N-terminal+++IPR014031///Beta-ketoacyl synthase, C-terminal+++IPR016035///Acyl transferase/ac…	PF00109///Beta-ketoacyl synthase, N-terminal domain+++PF00550///Phosphopantetheine attachment site+++PF00975///Thioesterase domain+++PF02801///Beta-ketoacyl synthase, C-terminal domain+++PF08659///KR domain+++PF13602///Zinc-binding dehydrogenase+++PF14765///Polyketide synthase dehydratase+++PF16197///Ketoacyl-synthetase C-terminal extension	00061///Fatty acid biosynthesis+++01100///Metabolic pathways+++01212///Fatty acid metabolism+++04152///AMPK signaling pathway+++04910///Insulin signaling pathway	R01404///acyl-[acyl-carrier protein]:NADP+ oxidoreductase Acyl-[acyl-carrier protein] + NADP+ <=> trans-2,3-Dehydroacyl-[acyl-carrier protein] + NADPH + H++++R01624///acetyl-CoA:[acyl-carrier-protein] S-acetyltransferase Acetyl-CoA + Acyl-carrier protein <=> CoA + Acetyl-[acyl-carrier protein]+++R01626///Malonyl-CoA:[acyl-carrier-protein] S-malonyltransferase Malonyl-CoA + Acyl-carrier protein <=…		NA
5573931	GO:0003824///catalytic activity+++GO:0004312///fatty acid synthase activity+++GO:0016491///oxidoreductase activity+++GO:0016740///transferase activity+++GO:0016788///hydrolase activity, acting on ester bonds+++GO:0031177///phosphopantetheine binding	IPR001031///Thioesterase+++IPR001227///Acyl transferase domain superfamily+++IPR009081///Phosphopantetheine binding ACP domain+++IPR011032///GroES-like superfamily+++IPR013149///Alcohol dehydrogenase, C-terminal+++IPR013968///Polyketide synthase, ketoreductase domain+++IPR014030///Beta-ketoacyl synthase, N-terminal+++IPR014031///Beta-ketoacyl synthase, C-terminal+++IPR016035///Acyl transferase/ac…	PF00107///Zinc-binding dehydrogenase+++PF00109///Beta-ketoacyl synthase, N-terminal domain+++PF00550///Phosphopantetheine attachment site+++PF00975///Thioesterase domain+++PF02801///Beta-ketoacyl synthase, C-terminal domain+++PF08659///KR domain+++PF14765///Polyketide synthase dehydratase+++PF16197///Ketoacyl-synthetase C-terminal extension	00061///Fatty acid biosynthesis+++01100///Metabolic pathways+++01212///Fatty acid metabolism+++04152///AMPK signaling pathway+++04910///Insulin signaling pathway	R01404///acyl-[acyl-carrier protein]:NADP+ oxidoreductase Acyl-[acyl-carrier protein] + NADP+ <=> trans-2,3-Dehydroacyl-[acyl-carrier protein] + NADPH + H++++R01624///acetyl-CoA:[acyl-carrier-protein] S-acetyltransferase Acetyl-CoA + Acyl-carrier protein <=> CoA + Acetyl-[acyl-carrier protein]+++R01626///Malonyl-CoA:[acyl-carrier-protein] S-malonyltransferase Malonyl-CoA + Acyl-carrier protein <=…		NA
5574420	GO:0008260///3-oxoacid CoA-transferase activity+++GO:0008410///CoA-transferase activity+++GO:0016740///transferase activity	IPR004163///Coenzyme A transferase binding site+++IPR004164///Coenzyme A transferase active site+++IPR004165///Coenzyme A transferase family I+++IPR012791///3-oxoacid CoA-transferase, subunit B+++IPR012792///3-oxoacid CoA-transferase, subunit A+++IPR014388///3-oxoacid CoA-transferase+++IPR037171///NagB/RpiA transferase-like	PF01144///Coenzyme A transferase	00072///Synthesis and degradation of ketone bodies+++00280///Valine, leucine and isoleucine degradation+++00650///Butanoate metabolism	R00410///succinyl-CoA:acetoacetate CoA-transferase Succinyl-CoA + Acetoacetate <=> Succinate + Acetoacetyl-CoA		NA
5574512	NA	IPR002347///Short-chain dehydrogenase/reductase SDR+++IPR036291///NAD(P)-binding domain superfamily	PF00106///short chain dehydrogenase	00062///Fatty acid elongation+++00140///Steroid hormone biosynthesis+++01040///Biosynthesis of unsaturated fatty acids+++01100///Metabolic pathways+++01110///Biosynthesis of secondary metabolites+++01212///Fatty acid metabolism	R02352///Estradiol-17beta:NAD+ 17-oxidoreductase Estradiol-17beta + NAD+ <=> Estrone + NADH + H++++R02353///Estradiol-17beta:NADP+ 17-oxidoreductase Estradiol-17beta + NADP+ <=> Estrone + NADPH + H++++R04681///Estriol:NAD+ 17-oxidoreductase Estriol + NAD+ <=> 16alpha-Hydroxyestrone + NADH + H++++R04682///Estriol:NADP+ 17-oxidoreductase Estriol + NADP+ <=> 16alpha-Hydroxyestrone + NADPH + H++++R07…		NA
5574574	GO:0004767///sphingomyelin phosphodiesterase activity+++GO:0016787///hydrolase activity+++GO:0016798///hydrolase activity, acting on glycosyl bonds+++GO:0046872///metal ion binding	IPR004843///Calcineurin-like phosphoesterase domain, ApaH type+++IPR011160///Sphingomyelin phosphodiesterase+++IPR029052///Metallo-dependent phosphatase-like	PF00149///Calcineurin-like phosphoesterase	00600///Sphingolipid metabolism+++01100///Metabolic pathways+++04071///Sphingolipid signaling pathway+++04142///Lysosome+++04217///Necroptosis	R02541///Sphingomyelin cholinephosphohydrolase Sphingomyelin + H2O <=> N-Acylsphingosine + Choline phosphate		NA
5575285	GO:0016620///oxidoreductase activity, acting on the aldehyde or oxo group of donors, NAD or NADP as acceptor	IPR015590///Aldehyde dehydrogenase domain+++IPR016161///Aldehyde/histidinol dehydrogenase+++IPR016162///Aldehyde dehydrogenase, N-terminal+++IPR016163///Aldehyde dehydrogenase, C-terminal+++IPR029510///Aldehyde dehydrogenase, glutamic acid active site	PF00171///Aldehyde dehydrogenase family	00010///Glycolysis / Gluconeogenesis+++00053///Ascorbate and aldarate metabolism+++00071///Fatty acid degradation+++00260///Glycine, serine and threonine metabolism+++00280///Valine, leucine and isoleucine degradation+++00310///Lysine degradation+++00330///Arginine and proline metabolism+++00340///Histidine metabolism+++00380///Tryptophan metabolism+++00410///beta-Alanine metabolism+++00561///Gly…	R00631///aldehyde:NAD+ oxidoreductase Aldehyde + NAD+ + H2O <=> Fatty acid + NADH + H++++R00710///Acetaldehyde:NAD+ oxidoreductase Acetaldehyde + NAD+ + H2O <=> Acetate + NADH + H++++R00904///3-aminopropanal:NAD+ oxidoreductase 3-Aminopropanal + NAD+ + H2O <=> beta-Alanine + NADH + H++++R01752///D-Glyceraldehyde:NAD+ oxidoreductase D-Glyceraldehyde + NAD+ + H2O <=> D-Glycerate + NADH + H++++R0198…		NA
5575420	GO:0036374///glutathione hydrolase activity	IPR000101///Gamma-glutamyltranspeptidase+++IPR029055///Nucleophile aminohydrolases, N-terminal	PF01019///Gamma-glutamyltranspeptidase	00430///Taurine and hypotaurine metabolism+++00460///Cyanoamino acid metabolism+++00480///Glutathione metabolism+++00590///Arachidonic acid metabolism+++01100///Metabolic pathways	R00494///glutathione gamma-glutamylaminopeptidase Glutathione + H2O <=> Cys-Gly + L-Glutamate+++R01262///glutathione:L-amino-acid 5-glutamyltransferase Glutathione + L-Amino acid <=> Cys-Gly + (5-L-Glutamyl)-L-amino acid+++R01687///(5-L-glutamyl)-peptide:taurine 5-glutamyltransferase (5-L-Glutamyl)-peptide + Taurine <=> Peptide + 5-L-Glutamyl-taurine+++R03916///(5-glutamyl)-peptide:amino-acid 5-g…		NA
5575521	GO:0016746///transferase activity, transferring acyl groups	IPR002123///Phospholipid/glycerol acyltransferase	PF01553///Acyltransferase	00561///Glycerolipid metabolism+++00564///Glycerophospholipid metabolism+++01100///Metabolic pathways+++01110///Biosynthesis of secondary metabolites+++04072///Phospholipase D signaling pathway+++04975///Fat digestion and absorption	R02241///acyl-CoA:1-acyl-sn-glycerol-3-phosphate 2-O-acyltransferase Phosphatidate + CoA <=> 1-Acyl-sn-glycerol 3-phosphate + Acyl-CoA+++R09381///acyl-ACP:1-acyl-sn-glycerol-3-phosphate 2-O-acyltransferase Acyl-[acyl-carrier protein] + 1-Acyl-sn-glycerol 3-phosphate <=> Acyl-carrier protein + Phosphatidate		R-BTA-1483213///Synthesis of PE
5575560	GO:0016740///transferase activity+++GO:0102336///3-oxo-arachidoyl-CoA synthase activity+++GO:0102337///3-oxo-cerotoyl-CoA synthase activity+++GO:0102338///3-oxo-lignoceronyl-CoA synthase activity+++GO:0102756///very-long-chain 3-ketoacyl-CoA synthase activity	IPR002076///ELO family	PF01151///GNS1/SUR4 family	00062///Fatty acid elongation+++01040///Biosynthesis of unsaturated fatty acids+++01100///Metabolic pathways+++01110///Biosynthesis of secondary metabolites+++01212///Fatty acid metabolism	R09419///acyl-CoA:malonyl-CoA C-acyltransferase (decarboxylating) Malonyl-CoA + Acyl-CoA <=> 3-Oxoacyl-CoA + CoA + CO2+++R10825///very-long-chain acyl-CoA:malonyl-CoA C-acyltransferase (decarboxylating) Very-long-chain acyl-CoA + Malonyl-CoA <=> Very-long-chain 3-oxoacyl-CoA + CO2 + CoA		NA
5575606	GO:0016740///transferase activity+++GO:0016757///transferase activity, transferring glycosyl groups+++GO:0016758///transferase activity, transferring hexosyl groups	IPR002213///UDP-glucuronosyl/UDP-glucosyltransferase+++IPR035595///UDP-glycosyltransferase family, conserved site	PF00201///UDP-glucoronosyl and UDP-glucosyl transferase	00040///Pentose and glucuronate interconversions+++00053///Ascorbate and aldarate metabolism+++00140///Steroid hormone biosynthesis+++00830///Retinol metabolism+++00860///Porphyrin and chlorophyll metabolism+++00980///Metabolism of xenobiotics by cytochrome P450+++00982///Drug metabolism - cytochrome P450+++00983///Drug metabolism - other enzymes+++01100///Metabolic pathways+++01110///Biosynthesi…	R01383///UDPglucuronate beta-D-glucuronosyltransferase (acceptor-unspecific) UDP-glucuronate + ROH <=> UDP + beta-D-Glucuronoside+++R02358///UDPglucuronate beta-D-glucuronosyltransferase(acceptor-unspecific) Estrone + UDP-glucuronate <=> Estrone glucuronide + UDP+++R02389///UDPglucuronate beta-D-glucuronosyltransferase(acceptor-unspecific) 2 UDP-glucuronate + Bilirubin <=> 2 UDP + Bilirubin beta-…		R-DME-8848584///Wax biosynthesis
5576024	NA	IPR013830///SGNH hydrolase-type esterase domain+++IPR036514///SGNH hydrolase superfamily	PF13472///GDSL-like Lipase/Acylhydrolase family	00565///Ether lipid metabolism+++01100///Metabolic pathways	R04452///1-Alkyl-2-acetyl-sn-glycero-3-phosphocholine acetohydrolase 2-Acetyl-1-alkyl-sn-glycero-3-phosphocholine + H2O <=> 1-Organyl-2-lyso-sn-glycero-3-phosphocholine + Acetate		NA
5576144	GO:0016787///hydrolase activity+++GO:0016788///hydrolase activity, acting on ester bonds	IPR000073///Alpha/beta hydrolase fold-1+++IPR025483///Lipase, eukaryotic+++IPR029058///Alpha/Beta hydrolase fold	PF00561///alpha/beta hydrolase fold	00100///Steroid biosynthesis+++04142///Lysosome+++04979///Cholesterol metabolism	R01462///cholesterol ester acylhydrolase Cholesterol ester + H2O <=> Cholesterol + Fatty acid		NA
5576217	GO:0003857///3-hydroxyacyl-CoA dehydrogenase activity+++GO:0016491///oxidoreductase activity+++GO:0070403///NAD+ binding	IPR006108///3-hydroxyacyl-CoA dehydrogenase, C-terminal+++IPR006176///3-hydroxyacyl-CoA dehydrogenase, NAD binding+++IPR006180///3-hydroxyacyl-CoA dehydrogenase, conserved site+++IPR008927///6-phosphogluconate dehydrogenase-like, C-terminal domain superfamily+++IPR013328///6-phosphogluconate dehydrogenase, domain 2+++IPR022694///3-hydroxyacyl-CoA dehydrogenase+++IPR036291///NAD(P)-binding domain …	PF00725///3-hydroxyacyl-CoA dehydrogenase, C-terminal domain+++PF02737///3-hydroxyacyl-CoA dehydrogenase, NAD binding domain	00062///Fatty acid elongation+++00071///Fatty acid degradation+++00280///Valine, leucine and isoleucine degradation+++00281///Geraniol degradation+++00310///Lysine degradation+++00380///Tryptophan metabolism+++00650///Butanoate metabolism+++00930///Caprolactam degradation+++01100///Metabolic pathways+++01110///Biosynthesis of secondary metabolites+++01120///Microbial metabolism in diverse environ…	R01778///(3S)-3-hydroxyacyl-CoA:NAD+ oxidoreductase (3S)-3-Hydroxyacyl-CoA + NAD+ <=> 3-Oxoacyl-CoA + NADH + H++++R01975///(S)-3-Hydroxybutanoyl-CoA:NAD+ oxidoreductase (S)-3-Hydroxybutanoyl-CoA + NAD+ <=> Acetoacetyl-CoA + NADH + H++++R04203///(2S,3S)-3-hydroxy-2-methylbutanoyl-CoA:NAD+ oxidoreductase (2S,3S)-3-Hydroxy-2-methylbutanoyl-CoA + NAD+ <=> 2-Methylacetoacetyl-CoA + NADH + H++++R04737/…		NA
5576312	GO:0003824///catalytic activity+++GO:0008483///transaminase activity+++GO:0030170///pyridoxal phosphate binding	IPR005814///Aminotransferase class-III+++IPR015421///Pyridoxal phosphate-dependent transferase, major domain+++IPR015422///Pyridoxal phosphate-dependent transferase domain 1+++IPR015424///Pyridoxal phosphate-dependent transferase	PF00202///Aminotransferase class-III	00564///Glycerophospholipid metabolism+++01100///Metabolic pathways	R00748///ethanolamine-phosphate phosphate-lyase (deaminating; acetaldehyde-forming) Ethanolamine phosphate + H2O <=> Acetaldehyde + Ammonia + Orthophosphate		NA
5576494	GO:0016788///hydrolase activity, acting on ester bonds	IPR006693///Partial AB-hydrolase lipase domain+++IPR025483///Lipase, eukaryotic+++IPR029058///Alpha/Beta hydrolase fold	PF04083///Partial alpha/beta-hydrolase lipase region	00100///Steroid biosynthesis+++04142///Lysosome+++04979///Cholesterol metabolism	R01462///cholesterol ester acylhydrolase Cholesterol ester + H2O <=> Cholesterol + Fatty acid		R-RNO-1660661///Sphingolipid de novo biosynthesis
5576970	GO:0016758///transferase activity, transferring hexosyl groups	IPR002213///UDP-glucuronosyl/UDP-glucosyltransferase	PF00201///UDP-glucoronosyl and UDP-glucosyl transferase	00040///Pentose and glucuronate interconversions+++00053///Ascorbate and aldarate metabolism+++00140///Steroid hormone biosynthesis+++00830///Retinol metabolism+++00860///Porphyrin and chlorophyll metabolism+++00980///Metabolism of xenobiotics by cytochrome P450+++00982///Drug metabolism - cytochrome P450+++00983///Drug metabolism - other enzymes+++01100///Metabolic pathways+++01110///Biosynthesi…	R01383///UDPglucuronate beta-D-glucuronosyltransferase (acceptor-unspecific) UDP-glucuronate + ROH <=> UDP + beta-D-Glucuronoside+++R02358///UDPglucuronate beta-D-glucuronosyltransferase(acceptor-unspecific) Estrone + UDP-glucuronate <=> Estrone glucuronide + UDP+++R02389///UDPglucuronate beta-D-glucuronosyltransferase(acceptor-unspecific) 2 UDP-glucuronate + Bilirubin <=> 2 UDP + Bilirubin beta-…		NA
5577067	GO:0016740///transferase activity+++GO:0102336///3-oxo-arachidoyl-CoA synthase activity+++GO:0102337///3-oxo-cerotoyl-CoA synthase activity+++GO:0102338///3-oxo-lignoceronyl-CoA synthase activity+++GO:0102756///very-long-chain 3-ketoacyl-CoA synthase activity	IPR002076///ELO family	PF01151///GNS1/SUR4 family	00062///Fatty acid elongation+++01040///Biosynthesis of unsaturated fatty acids+++01100///Metabolic pathways+++01110///Biosynthesis of secondary metabolites+++01212///Fatty acid metabolism	R09419///acyl-CoA:malonyl-CoA C-acyltransferase (decarboxylating) Malonyl-CoA + Acyl-CoA <=> 3-Oxoacyl-CoA + CoA + CO2+++R10825///very-long-chain acyl-CoA:malonyl-CoA C-acyltransferase (decarboxylating) Very-long-chain acyl-CoA + Malonyl-CoA <=> Very-long-chain 3-oxoacyl-CoA + CO2 + CoA		NA
5577068	GO:0015020///glucuronosyltransferase activity+++GO:0016740///transferase activity+++GO:0016757///transferase activity, transferring glycosyl groups+++GO:0016758///transferase activity, transferring hexosyl groups	IPR002213///UDP-glucuronosyl/UDP-glucosyltransferase+++IPR035595///UDP-glycosyltransferase family, conserved site	PF00201///UDP-glucoronosyl and UDP-glucosyl transferase	00040///Pentose and glucuronate interconversions+++00053///Ascorbate and aldarate metabolism+++00140///Steroid hormone biosynthesis+++00830///Retinol metabolism+++00860///Porphyrin and chlorophyll metabolism+++00980///Metabolism of xenobiotics by cytochrome P450+++00982///Drug metabolism - cytochrome P450+++00983///Drug metabolism - other enzymes+++01100///Metabolic pathways+++01110///Biosynthesi…	R01383///UDPglucuronate beta-D-glucuronosyltransferase (acceptor-unspecific) UDP-glucuronate + ROH <=> UDP + beta-D-Glucuronoside+++R02358///UDPglucuronate beta-D-glucuronosyltransferase(acceptor-unspecific) Estrone + UDP-glucuronate <=> Estrone glucuronide + UDP+++R02389///UDPglucuronate beta-D-glucuronosyltransferase(acceptor-unspecific) 2 UDP-glucuronate + Bilirubin <=> 2 UDP + Bilirubin beta-…		NA
5577070	GO:0015020///glucuronosyltransferase activity+++GO:0016740///transferase activity+++GO:0016757///transferase activity, transferring glycosyl groups+++GO:0016758///transferase activity, transferring hexosyl groups	IPR002213///UDP-glucuronosyl/UDP-glucosyltransferase+++IPR035595///UDP-glycosyltransferase family, conserved site	PF00201///UDP-glucoronosyl and UDP-glucosyl transferase	00040///Pentose and glucuronate interconversions+++00053///Ascorbate and aldarate metabolism+++00140///Steroid hormone biosynthesis+++00830///Retinol metabolism+++00860///Porphyrin and chlorophyll metabolism+++00980///Metabolism of xenobiotics by cytochrome P450+++00982///Drug metabolism - cytochrome P450+++00983///Drug metabolism - other enzymes+++01100///Metabolic pathways+++01110///Biosynthesi…	R01383///UDPglucuronate beta-D-glucuronosyltransferase (acceptor-unspecific) UDP-glucuronate + ROH <=> UDP + beta-D-Glucuronoside+++R02358///UDPglucuronate beta-D-glucuronosyltransferase(acceptor-unspecific) Estrone + UDP-glucuronate <=> Estrone glucuronide + UDP+++R02389///UDPglucuronate beta-D-glucuronosyltransferase(acceptor-unspecific) 2 UDP-glucuronate + Bilirubin <=> 2 UDP + Bilirubin beta-…		NA
5577178	GO:0042284///sphingolipid delta-4 desaturase activity	IPR005804///Fatty acid desaturase domain+++IPR011388///Sphingolipid delta4-desaturase+++IPR013866///Sphingolipid delta4-desaturase, N-terminal	PF00487///Fatty acid desaturase+++PF08557///Sphingolipid Delta4-desaturase (DES)	00600///Sphingolipid metabolism+++01100///Metabolic pathways+++04071///Sphingolipid signaling pathway	R06519///dihydroceramide,ferrocytochrome b5:oxygen oxidoreductase (4,5-dehydrogenating) Dihydroceramide + 2 Ferrocytochrome b5 + Oxygen + 2 H+ <=> N-Acylsphingosine + 2 Ferricytochrome b5 + 2 H2O		R-HSA-1483148///Synthesis of PG
5577411	GO:0016491///oxidoreductase activity	IPR018170///Aldo/keto reductase, conserved site+++IPR020471///Aldo/keto reductase+++IPR023210///NADP-dependent oxidoreductase domain+++IPR036812///NADP-dependent oxidoreductase domain superfamily	PF00248///Aldo/keto reductase family	00010///Glycolysis / Gluconeogenesis+++00040///Pentose and glucuronate interconversions+++00561///Glycerolipid metabolism+++00930///Caprolactam degradation+++01100///Metabolic pathways+++01110///Biosynthesis of secondary metabolites+++01120///Microbial metabolism in diverse environments+++01130///Biosynthesis of antibiotics+++01220///Degradation of aromatic compounds	R00746///Ethanol:NADP+ oxidoreductase Ethanol + NADP+ <=> Acetaldehyde + NADPH + H++++R01041///glycerol:NADP+ oxidoreductase Glycerol + NADP+ <=> D-Glyceraldehyde + NADPH + H++++R01481///L-gulonate:NADP+ 6-oxidoreductase L-Gulonate + NADP+ <=> D-Glucuronate + NADPH + H++++R05231///6-Hydroxyhexanoate:NADP+ oxidoreductase 6-Hydroxyhexanoic acid + NADP+ <=> Adipate semialdehyde + NADPH + H+		R-DME-192456///Digestion of dietary lipid+++R-DME-6809371///Formation of the cornified envelope
5577432	GO:0008374///O-acyltransferase activity	IPR003386///Lecithin:cholesterol/phospholipid:diacylglycerol acyltransferase+++IPR029058///Alpha/Beta hydrolase fold	PF02450///Lecithin:cholesterol acyltransferase	00564///Glycerophospholipid metabolism+++04142///Lysosome	R02746///1-Acyl-sn-glycero-3-phosphocholine acylhydrolase 1-Acyl-sn-glycero-3-phosphocholine + H2O <=> sn-Glycero-3-phosphocholine + Fatty acid		R-MMU-75105///Fatty acyl-CoA biosynthesis
5578011	NA	IPR000326///Phosphatidic acid phosphatase type 2/haloperoxidase+++IPR032462///Phosphatidate phosphatase PPAPDC1B+++IPR036938///Phosphatidic acid phosphatase type 2/haloperoxidase superfamily	PF01569///PAP2 superfamily	00561///Glycerolipid metabolism+++00564///Glycerophospholipid metabolism+++01110///Biosynthesis of secondary metabolites	R02239///1,2-diacyl-sn-glycerol 3-phosphate phosphohydrolase Phosphatidate + H2O <=> 1,2-Diacyl-sn-glycerol + Orthophosphate		R-BTA-71064///Lysine catabolism
5578161	GO:0016740///transferase activity+++GO:0102336///3-oxo-arachidoyl-CoA synthase activity+++GO:0102337///3-oxo-cerotoyl-CoA synthase activity+++GO:0102338///3-oxo-lignoceronyl-CoA synthase activity+++GO:0102756///very-long-chain 3-ketoacyl-CoA synthase activity	IPR002076///ELO family+++IPR030457///ELO family, conserved site	PF01151///GNS1/SUR4 family	00062///Fatty acid elongation+++01040///Biosynthesis of unsaturated fatty acids+++01100///Metabolic pathways+++01110///Biosynthesis of secondary metabolites+++01212///Fatty acid metabolism	R09419///acyl-CoA:malonyl-CoA C-acyltransferase (decarboxylating) Malonyl-CoA + Acyl-CoA <=> 3-Oxoacyl-CoA + CoA + CO2+++R10825///very-long-chain acyl-CoA:malonyl-CoA C-acyltransferase (decarboxylating) Very-long-chain acyl-CoA + Malonyl-CoA <=> Very-long-chain 3-oxoacyl-CoA + CO2 + CoA		NA
5578680	GO:0016491///oxidoreductase activity+++GO:0016717///oxidoreductase activity, acting on paired donors, with oxidation of a pair of donors resulting in the reduction of molecular oxygen to two molecules of water	IPR005804///Fatty acid desaturase domain+++IPR015876///Acyl-CoA desaturase	PF00487///Fatty acid desaturase	01040///Biosynthesis of unsaturated fatty acids+++01212///Fatty acid metabolism+++03320///PPAR signaling pathway+++04152///AMPK signaling pathway+++04212///Longevity regulating pathway - worm	R02222///steroyl-CoA,hydrogen-donor:oxygen oxidoreductase Stearoyl-CoA + 2 Ferrocytochrome b5 + Oxygen + 2 H+ <=> Oleoyl-CoA + 2 Ferricytochrome b5 + 2 H2O+++R12173///palmitoyl-CoA,ferrocytochrome-b5:oxygen oxidoreductase (9,10-dehydrogenating) Palmitoyl-CoA + 2 Ferrocytochrome b5 + Oxygen + 2 H+ <=> Palmitoleoyl-CoA + 2 Ferricytochrome b5 + 2 H2O		NA
5578682	GO:0016491///oxidoreductase activity+++GO:0016717///oxidoreductase activity, acting on paired donors, with oxidation of a pair of donors resulting in the reduction of molecular oxygen to two molecules of water	IPR015876///Acyl-CoA desaturase	NA	01040///Biosynthesis of unsaturated fatty acids+++01212///Fatty acid metabolism+++03320///PPAR signaling pathway+++04152///AMPK signaling pathway+++04212///Longevity regulating pathway - worm	R02222///steroyl-CoA,hydrogen-donor:oxygen oxidoreductase Stearoyl-CoA + 2 Ferrocytochrome b5 + Oxygen + 2 H+ <=> Oleoyl-CoA + 2 Ferricytochrome b5 + 2 H2O+++R12173///palmitoyl-CoA,ferrocytochrome-b5:oxygen oxidoreductase (9,10-dehydrogenating) Palmitoyl-CoA + 2 Ferrocytochrome b5 + Oxygen + 2 H+ <=> Palmitoleoyl-CoA + 2 Ferricytochrome b5 + 2 H2O		NA
5578684	GO:0016491///oxidoreductase activity+++GO:0016717///oxidoreductase activity, acting on paired donors, with oxidation of a pair of donors resulting in the reduction of molecular oxygen to two molecules of water	IPR005804///Fatty acid desaturase domain+++IPR015876///Acyl-CoA desaturase	PF00487///Fatty acid desaturase	01040///Biosynthesis of unsaturated fatty acids+++01212///Fatty acid metabolism+++03320///PPAR signaling pathway+++04152///AMPK signaling pathway+++04212///Longevity regulating pathway - worm	R02222///steroyl-CoA,hydrogen-donor:oxygen oxidoreductase Stearoyl-CoA + 2 Ferrocytochrome b5 + Oxygen + 2 H+ <=> Oleoyl-CoA + 2 Ferricytochrome b5 + 2 H2O+++R12173///palmitoyl-CoA,ferrocytochrome-b5:oxygen oxidoreductase (9,10-dehydrogenating) Palmitoyl-CoA + 2 Ferrocytochrome b5 + Oxygen + 2 H+ <=> Palmitoleoyl-CoA + 2 Ferricytochrome b5 + 2 H2O		R-HSA-174403///Glutathione synthesis and recycling+++R-HSA-2142691///Synthesis of Leukotrienes (LT) and Eoxins (EX)+++R-HSA-5423646///Aflatoxin activation and detoxification+++R-HSA-5579022///Defective GGT1 causes Glutathionuria (GLUTH)+++R-HSA-9035968///Defective GGT1 causes Glutathionuria (GLUTH)
5578908	GO:0016491///oxidoreductase activity+++GO:0080019///fatty-acyl-CoA reductase (alcohol-forming) activity+++GO:0102965///alcohol-forming fatty acyl-CoA reductase activity	IPR013120///Male sterility, NAD-binding+++IPR026055///Fatty acyl-CoA reductase+++IPR033640///Fatty acyl-CoA reductase, C-terminal+++IPR036291///NAD(P)-binding domain superfamily	PF03015///Male sterility protein+++PF07993///Male sterility protein	00073///Cutin, suberine and wax biosynthesis+++04146///Peroxisome+++04212///Longevity regulating pathway - worm	R09470///long-chain-primary-alcohol:NADP+ oxidoreductase (CoA-acylating) Long-chain acyl-CoA + 2 NADPH + 2 H+ <=> Primary alcohol + 2 NADP+ + CoA		NA
5578909	GO:0016491///oxidoreductase activity+++GO:0080019///fatty-acyl-CoA reductase (alcohol-forming) activity+++GO:0102965///alcohol-forming fatty acyl-CoA reductase activity	IPR013120///Male sterility, NAD-binding+++IPR026055///Fatty acyl-CoA reductase+++IPR033640///Fatty acyl-CoA reductase, C-terminal+++IPR036291///NAD(P)-binding domain superfamily	PF03015///Male sterility protein+++PF07993///Male sterility protein	00073///Cutin, suberine and wax biosynthesis+++04146///Peroxisome+++04212///Longevity regulating pathway - worm	R09470///long-chain-primary-alcohol:NADP+ oxidoreductase (CoA-acylating) Long-chain acyl-CoA + 2 NADPH + 2 H+ <=> Primary alcohol + 2 NADP+ + CoA		R-HSA-196108///Pregnenolone biosynthesis+++R-HSA-5652227///Fructose biosynthesis
5579046	GO:0004623///phospholipase A2 activity+++GO:0005509///calcium ion binding	IPR010711///Group XII secretory phospholipase A2 precursor+++IPR033113///Phospholipase A2, histidine active site+++IPR036444///Phospholipase A2 domain superfamily	PF06951///Group XII secretory phospholipase A2 precursor (PLA2G12)	00564///Glycerophospholipid metabolism+++00565///Ether lipid metabolism+++00590///Arachidonic acid metabolism+++00591///Linoleic acid metabolism+++00592///alpha-Linolenic acid metabolism+++01100///Metabolic pathways+++01110///Biosynthesis of secondary metabolites+++04014///Ras signaling pathway+++04270///Vascular smooth muscle contraction+++04972///Pancreatic secretion+++04975///Fat digestion and…	R01315///phosphatidylcholine 2-acylhydrolase Phosphatidylcholine + H2O <=> 1-Acyl-sn-glycero-3-phosphocholine + Fatty acid+++R01317///phosphatidylcholine 2-acylhydrolase Phosphatidylcholine + H2O <=> 1-Acyl-sn-glycero-3-phosphocholine + Arachidonate+++R02053///phosphatidylethanolamine 2-acylhydrolase Phosphatidylethanolamine + H2O <=> 1-Acyl-sn-glycero-3-phosphoethanolamine + Fatty acid+++R07064/…		R-DME-8848584///Wax biosynthesis
5579337	GO:0036374///glutathione hydrolase activity	IPR000101///Gamma-glutamyltranspeptidase+++IPR029055///Nucleophile aminohydrolases, N-terminal	PF01019///Gamma-glutamyltranspeptidase	00430///Taurine and hypotaurine metabolism+++00460///Cyanoamino acid metabolism+++00480///Glutathione metabolism+++00590///Arachidonic acid metabolism+++01100///Metabolic pathways	R00494///glutathione gamma-glutamylaminopeptidase Glutathione + H2O <=> Cys-Gly + L-Glutamate+++R01262///glutathione:L-amino-acid 5-glutamyltransferase Glutathione + L-Amino acid <=> Cys-Gly + (5-L-Glutamyl)-L-amino acid+++R01687///(5-L-glutamyl)-peptide:taurine 5-glutamyltransferase (5-L-Glutamyl)-peptide + Taurine <=> Peptide + 5-L-Glutamyl-taurine+++R03916///(5-glutamyl)-peptide:amino-acid 5-g…		R-HSA-192456///Digestion of dietary lipid
5579999	GO:0016491///oxidoreductase activity+++GO:0080019///fatty-acyl-CoA reductase (alcohol-forming) activity+++GO:0102965///alcohol-forming fatty acyl-CoA reductase activity	IPR013120///Male sterility, NAD-binding+++IPR026055///Fatty acyl-CoA reductase+++IPR033640///Fatty acyl-CoA reductase, C-terminal+++IPR036291///NAD(P)-binding domain superfamily	PF03015///Male sterility protein+++PF07993///Male sterility protein	00073///Cutin, suberine and wax biosynthesis+++04146///Peroxisome+++04212///Longevity regulating pathway - worm	R09470///long-chain-primary-alcohol:NADP+ oxidoreductase (CoA-acylating) Long-chain acyl-CoA + 2 NADPH + 2 H+ <=> Primary alcohol + 2 NADP+ + CoA		NA
5580249	GO:0008081///phosphoric diester hydrolase activity	IPR017946///PLC-like phosphodiesterase, TIM beta/alpha-barrel domain superfamily	NA	00072///Synthesis and degradation of ketone bodies+++00280///Valine, leucine and isoleucine degradation+++00650///Butanoate metabolism	R00410///succinyl-CoA:acetoacetate CoA-transferase Succinyl-CoA + Acetoacetate <=> Succinate + Acetoacetyl-CoA		NA
23687751	GO:0036374///glutathione hydrolase activity	IPR000101///Gamma-glutamyltranspeptidase+++IPR029055///Nucleophile aminohydrolases, N-terminal	PF01019///Gamma-glutamyltranspeptidase	00430///Taurine and hypotaurine metabolism+++00460///Cyanoamino acid metabolism+++00480///Glutathione metabolism+++00590///Arachidonic acid metabolism+++01100///Metabolic pathways	R00494///glutathione gamma-glutamylaminopeptidase Glutathione + H2O <=> Cys-Gly + L-Glutamate+++R01262///glutathione:L-amino-acid 5-glutamyltransferase Glutathione + L-Amino acid <=> Cys-Gly + (5-L-Glutamyl)-L-amino acid+++R01687///(5-L-glutamyl)-peptide:taurine 5-glutamyltransferase (5-L-Glutamyl)-peptide + Taurine <=> Peptide + 5-L-Glutamyl-taurine+++R03916///(5-glutamyl)-peptide:amino-acid 5-g…		R-CEL-77310///Beta oxidation of lauroyl-CoA to decanoyl-CoA-CoA
110677097	NA	NA	NA	00600///Sphingolipid metabolism+++01100///Metabolic pathways	R02541///Sphingomyelin cholinephosphohydrolase Sphingomyelin + H2O <=> N-Acylsphingosine + Choline phosphate		R-DME-1482925///Acyl chain remodelling of PG+++R-DME-1483076///Synthesis of CL
110680506	NA	NA	NA	00100///Steroid biosynthesis+++04142///Lysosome+++04979///Cholesterol metabolism	R01462///cholesterol ester acylhydrolase Cholesterol ester + H2O <=> Cholesterol + Fatty acid		NA
110681299	NA	NA	NA	00430///Taurine and hypotaurine metabolism+++00460///Cyanoamino acid metabolism+++00480///Glutathione metabolism+++00590///Arachidonic acid metabolism+++01100///Metabolic pathways	R00494///glutathione gamma-glutamylaminopeptidase Glutathione + H2O <=> Cys-Gly + L-Glutamate+++R01262///glutathione:L-amino-acid 5-glutamyltransferase Glutathione + L-Amino acid <=> Cys-Gly + (5-L-Glutamyl)-L-amino acid+++R01687///(5-L-glutamyl)-peptide:taurine 5-glutamyltransferase (5-L-Glutamyl)-peptide + Taurine <=> Peptide + 5-L-Glutamyl-taurine+++R03916///(5-glutamyl)-peptide:amino-acid 5-g…		NA
110681488	NA	IPR003033///SCP2 sterol-binding domain+++IPR036527///SCP2 sterol-binding domain superfamily+++IPR039543///Lipid-binding protein POX18/YhbT/NSL-TP1	NA	00120///Primary bile acid biosynthesis+++01040///Biosynthesis of unsaturated fatty acids+++01100///Metabolic pathways+++01212///Fatty acid metabolism+++04146///Peroxisome	R04809///(24R,25R)-3alpha,7alpha,24-trihydroxy-5beta-cholestanoyl-CoA hydro-lyase [(24E)-3alpha,7alpha-Dihydroxy-5beta-cholest-24-enoyl-CoA-forming] (24E)-3alpha,7alpha-Dihydroxy-5beta-cholest-24-enoyl-CoA + H2O <=> (24R,25R)-3alpha,7alpha,24-Trihydroxy-5beta-cholestanoyl-CoA+++R04810///(24R,25R)-3alpha,7alpha,24-trihydroxy-5beta-cholestanoyl-CoA:NAD+ oxidoreductase (24R,25R)-3alpha,7alpha,24-Tri…		R-HSA-5365859///RA biosynthesis pathway
110681517	NA	NA	NA	00561///Glycerolipid metabolism+++00564///Glycerophospholipid metabolism+++01100///Metabolic pathways+++01110///Biosynthesis of secondary metabolites+++04070///Phosphatidylinositol signaling system+++04072///Phospholipase D signaling pathway+++05231///Choline metabolism in cancer	R02240///ATP:1,2-diacylglycerol 3-phosphotransferase ATP + 1,2-Diacyl-sn-glycerol <=> ADP + Phosphatidate		NA
